# Supplementary material for: Human resources and curricula content for early child development implementation: multicountry mixed methods evaluation
Source: PubMed Central journal article supplement — BMJ Open. 2020 Apr 26;10(4):e032134. doi: 10.1136/bmjopen-2019-032134 (PMC7204990; doi:10.1136/bmjopen-2019-032134), 2020-04-26
Supplement: bmjopen-2019-032134.draft_revisions.pdf [file bmjopen-2019-032134.draft_revisions.pdf]

# BMJ Open

BMJ Open is committed to open peer review. As part of this commitment we make the peer review history of every article we publish publicly available.

When an article is published we post the peer reviewers' comments and the authors' responses online. We also post the versions of the paper that were used during peer review. These are the versions that the peer review comments apply to.

The versions of the paper that follow are the versions that were submitted during the peer review process. They are not the versions of record or the final published versions. They should not be cited or distributed as the published version of this manuscript.

BMJ Open is an open access journal and the full, final, typeset and author-corrected version of record of the manuscript is available on our site with no access controls, subscription charges or pay-per-view fees (<http://bmjopen.bmj.com>).

If you have any questions on BMJ Open's open peer review process please email [info.bmjopen@bmj.com](mailto:info.bmjopen@bmj.com)

# BMJ Open

## Human resources and curricula content for early child development implementation: multi-country mixed-methods evaluation

|                               |                                                                                                                                                                                                                                                                                                                                                                                                                                                                                                                                                                                                                                                                                                                                                                                                                                                                                                                                                                                                                                                                                                                                                                                                                                                                                                                                                                                                                                                                                                                                                                                                                                                                                                                                                                                                                                                                                                                                   |
|-------------------------------|-----------------------------------------------------------------------------------------------------------------------------------------------------------------------------------------------------------------------------------------------------------------------------------------------------------------------------------------------------------------------------------------------------------------------------------------------------------------------------------------------------------------------------------------------------------------------------------------------------------------------------------------------------------------------------------------------------------------------------------------------------------------------------------------------------------------------------------------------------------------------------------------------------------------------------------------------------------------------------------------------------------------------------------------------------------------------------------------------------------------------------------------------------------------------------------------------------------------------------------------------------------------------------------------------------------------------------------------------------------------------------------------------------------------------------------------------------------------------------------------------------------------------------------------------------------------------------------------------------------------------------------------------------------------------------------------------------------------------------------------------------------------------------------------------------------------------------------------------------------------------------------------------------------------------------------|
| Journal:                      | <i>BMJ Open</i>                                                                                                                                                                                                                                                                                                                                                                                                                                                                                                                                                                                                                                                                                                                                                                                                                                                                                                                                                                                                                                                                                                                                                                                                                                                                                                                                                                                                                                                                                                                                                                                                                                                                                                                                                                                                                                                                                                                   |
| Manuscript ID                 | bmjopen-2019-032134                                                                                                                                                                                                                                                                                                                                                                                                                                                                                                                                                                                                                                                                                                                                                                                                                                                                                                                                                                                                                                                                                                                                                                                                                                                                                                                                                                                                                                                                                                                                                                                                                                                                                                                                                                                                                                                                                                               |
| Article Type:                 | Research                                                                                                                                                                                                                                                                                                                                                                                                                                                                                                                                                                                                                                                                                                                                                                                                                                                                                                                                                                                                                                                                                                                                                                                                                                                                                                                                                                                                                                                                                                                                                                                                                                                                                                                                                                                                                                                                                                                          |
| Date Submitted by the Author: | 04-Jun-2019                                                                                                                                                                                                                                                                                                                                                                                                                                                                                                                                                                                                                                                                                                                                                                                                                                                                                                                                                                                                                                                                                                                                                                                                                                                                                                                                                                                                                                                                                                                                                                                                                                                                                                                                                                                                                                                                                                                       |
| Complete List of Authors:     | <p>Kohli-Lynch, Maya; London School of Hygiene and Tropical Medicine, Maternal, Adolescent, Reproductive and Child Health Centre; University of Bristol, School of Social and Community Medicine</p> <p>Ponce Hardy, Victoria; London School of Hygiene and Tropical Medicine, Maternal, Adolescent, Reproductive and Child Health Centre</p> <p>Bernal Salazar, Raquel; Universidad de Los Andes, Economics Department; Universidad de los Andes, Centro de Estudios de Desarrollo Economico (CEDE)</p> <p>Bhopal, Sunil; London School of Hygiene and Tropical Medicine, Maternal &amp; Child Health Intervention Research Group; Northern School of Paediatrics</p> <p>Brentani, Alexandra; Universidade de Sao Paulo, Departamento de Pediatria, Faculdade de Medicina</p> <p>Cavallera, Vanessa; World Health Organization, Department of Mental Health and Substance Abuse</p> <p>Goh, Esther; Bernard Van Leer Foundation</p> <p>Hamadani, Jena; icddr, Maternal and Child Health Division</p> <p>Hughes, Rob; London School of Hygiene and Tropical Medicine, Maternal &amp; Child Health Intervention Research Group; Children's Investment Fund Foundation</p> <p>Manji, Karim; Muhimbili University of Health and Allied Sciences, Department of Paediatrics and Child Health; Pediatrics</p> <p>Milner, Kate; London School of Hygiene and Tropical Medicine, Maternal, Adolescent, Reproductive and Child Health Centre; Murdoch Childrens Research Institute</p> <p>Radner, James; University of Toronto, Munk School of Global Affairs &amp; Public Policy; Harvard University, Center on the Developing Child</p> <p>Sharma, Sonia; Mobile Crèches, Sector IV</p> <p>Silver, Karlee; Grand Challenges Canada</p> <p>Lawn, Joy; London School of Hygiene and Tropical Medicine, Maternal, Adolescent, Reproductive and Child Health Centre</p> <p>Tann, Cally; London School of Hygiene and Tropical Medicine,</p> |
| Keywords:                     | early child development, implementation, health systems, child health, evaluation                                                                                                                                                                                                                                                                                                                                                                                                                                                                                                                                                                                                                                                                                                                                                                                                                                                                                                                                                                                                                                                                                                                                                                                                                                                                                                                                                                                                                                                                                                                                                                                                                                                                                                                                                                                                                                                 |
|                               |                                                                                                                                                                                                                                                                                                                                                                                                                                                                                                                                                                                                                                                                                                                                                                                                                                                                                                                                                                                                                                                                                                                                                                                                                                                                                                                                                                                                                                                                                                                                                                                                                                                                                                                                                                                                                                                                                                                                   |

1  
2  
3  
4  
5  
6  
7  
8  
9  
10  
11  
12  
13  
14  
15  
16  
17  
18  
19  
20  
21  
22  
23  
24  
25  
26  
27  
28  
29  
30  
31  
32  
33  
34  
35  
36  
37  
38  
39  
40  
41  
42  
43  
44  
45  
46  
47  
48  
49  
50  
51  
52  
53  
54  
55  
56  
57  
58  
59  
60

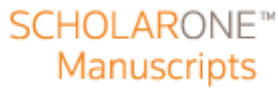

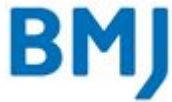

I, the Submitting Author has the right to grant and does grant on behalf of all authors of the Work (as defined in the below author licence), an exclusive licence and/or a non-exclusive licence for contributions from authors who are: i) UK Crown employees; ii) where BMJ has agreed a CC-BY licence shall apply, and/or iii) in accordance with the terms applicable for US Federal Government officers or employees acting as part of their official duties; on a worldwide, perpetual, irrevocable, royalty-free basis to BMJ Publishing Group Ltd ("BMJ") its licensees and where the relevant Journal is co-owned by BMJ to the co-owners of the Journal, to publish the Work in this journal and any other BMJ products and to exploit all rights, as set out in our [licence](#).

The Submitting Author accepts and understands that any supply made under these terms is made by BMJ to the Submitting Author unless you are acting as an employee on behalf of your employer or a postgraduate student of an affiliated institution which is paying any applicable article publishing charge ("APC") for Open Access articles. Where the Submitting Author wishes to make the Work available on an Open Access basis (and intends to pay the relevant APC), the terms of reuse of such Open Access shall be governed by a Creative Commons licence – details of these licences and which [Creative Commons](#) licence will apply to this Work are set out in our licence referred to above.

Other than as permitted in any relevant BMJ Author's Self Archiving Policies, I confirm this Work has not been accepted for publication elsewhere, is not being considered for publication elsewhere and does not duplicate material already published. I confirm all authors consent to publication of this Work and authorise the granting of this licence.

Paper Title: **Human resources and curricula content for early child development implementation: multi-country mixed-methods evaluation**

|                |                                                                                                                                                                                                                                                                                                                                                                                                                                                                                                                                                                                                                                                                                                                                                                                                                                                                                                                                                                                                                                                                                                                                                                                                                                                                                                                                                                                                                                                                                                                                                                                                                                                                                                                                                                                                                           |
|----------------|---------------------------------------------------------------------------------------------------------------------------------------------------------------------------------------------------------------------------------------------------------------------------------------------------------------------------------------------------------------------------------------------------------------------------------------------------------------------------------------------------------------------------------------------------------------------------------------------------------------------------------------------------------------------------------------------------------------------------------------------------------------------------------------------------------------------------------------------------------------------------------------------------------------------------------------------------------------------------------------------------------------------------------------------------------------------------------------------------------------------------------------------------------------------------------------------------------------------------------------------------------------------------------------------------------------------------------------------------------------------------------------------------------------------------------------------------------------------------------------------------------------------------------------------------------------------------------------------------------------------------------------------------------------------------------------------------------------------------------------------------------------------------------------------------------------------------|
| Author list:   |                                                                                                                                                                                                                                                                                                                                                                                                                                                                                                                                                                                                                                                                                                                                                                                                                                                                                                                                                                                                                                                                                                                                                                                                                                                                                                                                                                                                                                                                                                                                                                                                                                                                                                                                                                                                                           |
| First author:  | Maya Kohli-Lynch <sup>1,2</sup>                                                                                                                                                                                                                                                                                                                                                                                                                                                                                                                                                                                                                                                                                                                                                                                                                                                                                                                                                                                                                                                                                                                                                                                                                                                                                                                                                                                                                                                                                                                                                                                                                                                                                                                                                                                           |
| Second author: | Victoria Ponce Hardy <sup>1</sup>                                                                                                                                                                                                                                                                                                                                                                                                                                                                                                                                                                                                                                                                                                                                                                                                                                                                                                                                                                                                                                                                                                                                                                                                                                                                                                                                                                                                                                                                                                                                                                                                                                                                                                                                                                                         |
| Alphabetical:  | Raquel Bernal Salazar <sup>3,4</sup> , Sunil Bhopal <sup>5,6</sup> , Alexandra Brentani <sup>7</sup> , Vanessa Cavallera <sup>8</sup> , Esther Goh <sup>9</sup> , Jena Hamadani <sup>10</sup> , Rob Hughes <sup>5, 11</sup> , Karim Manji <sup>12</sup> , Kate M Milner <sup>1,13</sup> , James Radner <sup>14,15</sup> , Sonia Sharma <sup>16</sup> , Karlee Silver <sup>17</sup> , Joy E Lawn <sup>1</sup>                                                                                                                                                                                                                                                                                                                                                                                                                                                                                                                                                                                                                                                                                                                                                                                                                                                                                                                                                                                                                                                                                                                                                                                                                                                                                                                                                                                                              |
| Last author:   | Cally J Tann <sup>1,18</sup>                                                                                                                                                                                                                                                                                                                                                                                                                                                                                                                                                                                                                                                                                                                                                                                                                                                                                                                                                                                                                                                                                                                                                                                                                                                                                                                                                                                                                                                                                                                                                                                                                                                                                                                                                                                              |
| Affiliations   | <ol style="list-style-type: none"> <li>1. Maternal, Adolescent, Reproductive and Child Health Centre, London School of Hygiene &amp; Tropical Medicine, London, UK</li> <li>2. School of Social and Community Medicine, University of Bristol, Bristol, UK</li> <li>3. Economics Department, Universidad de los Andes, Bogota, Colombia</li> <li>4. Centre de Estudios de Desarrollo Economico (CEDE), Universidad de los Andes, Colombia</li> <li>5. Maternal &amp; Child Health Intervention Research Group, Department of Population Health, London School of Hygiene &amp; Tropical Medicine, London, UK</li> <li>6. Northern School of Paediatrics, Newcastle upon Tyne, UK</li> <li>7. Departamento de Pediatria, Faculdade de Medicina da Universidade de São Paulo, São Paulo, Brazil</li> <li>8. Department of Mental Health and Substance Abuse, World Health Organisation, Geneva, Switzerland</li> <li>9. Bernard van Leer Foundation, The Hague, The Netherlands</li> <li>10. Maternal and Child Health Division, International Centre for Diarrhoeal Disease Research, Dhaka, Bangladesh</li> <li>11. Children's Investment Fund Foundation, London, UK</li> <li>12. Department of Paediatrics and Child Health, Muhimbili University of Allied Health Allied Sciences, Dar es Salaam, Tanzania</li> <li>13. Murdoch Children's Research Institute, Melbourne, Australia</li> <li>14. Munk School of Global Affairs &amp; Public Policy, University of Toronto, Toronto, Canada</li> <li>15. Center on the Developing Child, Harvard University, Cambridge, Massachusetts, USA</li> <li>16. Mobile Crèches, Sector IV, New Delhi, India</li> <li>17. Grand Challenges Canada, Toronto, Ontario, Canada</li> <li>18. Neonatal Medicine, University College London Hospitals NHS Trust, London, UK</li> </ol> |

**Corresponding Author:** Cally Tann, c/- MARCH Centre, London School of Hygiene & Tropical Medicine, Keppel St, London WC1E7HT, United Kingdom, [cally.tann@lshtm.ac.uk](mailto:cally.tann@lshtm.ac.uk), + 44 (0)20 6636 8636

**Word count** (excluding title page, abstract, references, textboxes, tables, figures): 4,623

## ABSTRACT

**Background:** The World Health Organization recommends responsive caregiving and early learning (RCEL) interventions to improve early child development (ECD), and to achieve the Sustainable Development Goals' vision of a world where all children thrive. Implementation of RCEL programmes in low- and middle-income countries (LMIC) requires evidence to inform decisions about human resources and curricula content.

**Methods:** We undertook a mixed-methods evaluation of RCEL projects within the Grand Challenges Canada® Saving Brains® ECD portfolio. Quantitative data were collected through standardised reporting tools. Qualitative data were collected from ECD experts and stakeholders and analysed using thematic content analysis, informed by literature review.

**Results:** We evaluated 32 RCEL projects across 17 LMIC on four continents. Overall, 2,197 workers delivered ECD interventions to 25,909 families. Major themes regarding human resources included; worker characteristics, incentivisation, retention, training and supervision; and regarding curricula content; need for flexible adaptation of content and delivery, maintaining fidelity, and intervention duration and dosage. Lack of a universally agreed standard ECD package contributed to project heterogeneity, while need for contextual adaptation of curricula content, human resources management, and service delivery was highlighted. Incorporation of ECD into existing services may facilitate scale-up but overburdened workers plus potential reductions in service quality remain challenging. Supportive training and supervision, inducement, worker retention, dosage and delivery modality emerged as key implementation decisions.

**Conclusions and implications:** This mixed-method evaluation of a multi-country ECD portfolio identified themes for policymakers and programme leaders to consider in implementation of RCEL interventions in diverse LMIC settings, especially through routine government systems. Although this is the largest portfolio analysed to date, the level of scale remains limited, at ~25,000 people. High-quality process and costing evaluations in larger scale populations with comparable data are required to further inform decisions for implementation of RCEL projects at national and regional scale.

## ARTICLE SUMMARY

### Strengths and limitations of this study

- Scale-up of responsive caregiving and early learning (RCEL) interventions, a key domain in the WHO/UNICEF/World Bank Nurturing Care Framework, requires evidence to inform decisions about human resources and curricula content for implementation.
- This is the first paper to report on workforce data from the large multi-country Saving Brains® child development portfolio. We analysed data from 32 RCEL projects based in 17 low- and middle-income countries, including a total of 2,197 frontline workers who delivered early child development (ECD) interventions to over 25,000 children and parents.
- A lack of universally agreed standard package for ECD interventions contributed to project heterogeneity within the portfolio. The importance of contextual adaptation of curricula content, human resources management, and service delivery strategies was highlighted. Development of more standardised RCEL curricula and training content for scaling would address project heterogeneity and adaptation to context.
- Incorporation of ECD into existing services may allow for wider scale-up, but challenges related to already high workloads plus potential reductions in service quality remain.
- Rigorous evaluations are required to inform decisions for implementation of RCEL projects at scale. There are almost no cost data to plan services and we found no data on materials for workers' use.

## BACKGROUND

Optimal early child development (ECD) is central to the Sustainable Development Goals' (SDG) vision of a world in which children can *thrive*.(4, 5) ECD programmes have the potential to transform human capital across the life course, and scale-up of responsive caregiving and early learning (RCEL) is advocated by the World Health Organisation (WHO), UNICEF and World Bank, as a key part of the Nurturing Care Framework (NCF) launched in 2018 (see Panel 1).(1, 6-9) Programmes promoting RCEL have been found to be effective for ECD and related to longer term outcomes, including educational attainment and adult earnings.(1, 10)

### **Panel 1: Terms for responsive care & early learning for early child development**

Multiple terms are used to describe interventions that promote early child development. The WHO, UNICEF & World Bank's Nurturing Care Framework refers to a spectrum of requirements necessary for reaching full developmental potential, including: good health, security and safety, nutrition, responsive caregiving, and early learning.

In this paper, we use the concept of nurturing care, and specifically the term 'responsive care and early learning' (RCEL). RCEL describes the promotion of ECD through learning, play, and caregiving that is responsive to children's needs.(1-3) Similar terms include 'responsive care/caregiving', 'responsive stimulation', 'nurturing care', 'psychosocial stimulation', 'early learning' and 'play'.

However, there are limited data to guide practical implementation of RCEL programmes at scale, and a particular lack of data regarding human resources and curricula content.(11-13) Additionally, guidance for contextual adaptation of projects is crucial but complex for RCEL which involves sectors beyond health. These gaps present challenges to decision-makers and may result in small-scale projects making design choices that limit the potential for sustainable scaling.(1, 14, 15) Thus, analysis of implementation factors for scaling of RCEL projects, particularly human resources and curricula content, is needed.(11)

The *Lancet* series 'Advancing Early Child Development: from Science to Scale' (16) and the *Annals of the New York Academy of Sciences* series 'Implementation Research and Practice for Early Childhood Development' (17) described gaps in the literature relating to ECD programming. The *Archives of Diseases in Childhood* series 'Informing design and implementation for early child development programmes' (18-22) provided evidence from the Grand Challenges Canada® (GCC) Saving Brains® portfolio for decision points related to ECD programming but did not specifically address human resources and curricula content. This paper responds to this gap, building on *Radner et al's* exploration of lessons learned on scaling



1  
2  
3 from the Saving Brains portfolio to explore human resources and curricula content in a diverse  
4 range of RCEL programmes from the same portfolio,(23) We predominantly use a health  
5 sector perspective, and contextualise our findings within learning from multi-country  
6 evaluations of community-based maternal and newborn care and evaluations of mental health  
7 and nutrition programming.  
8  
9  
10  
11  
12

### 13 **Aims & objectives**

14  
15  
16 This paper aims to describe human resources and curricula content for implementation of  
17 RCEL projects across diverse low- and middle-income countries (LMIC), using data from the  
18 Saving Brains portfolio. We will address *who* delivers the project, including training, supervision  
19 and inducement; and *what* the specific curricula content is, including materials, intensity,  
20 quality, fidelity and adaptation. Objectives are to:  
21  
22  
23  
24  
25

- 26 1. Quantitatively analyse human resources and curricula content for RCEL projects in the  
27 Saving Brains portfolio.
- 28 2. Qualitatively analyse programme design and implementation decisions, focusing on  
29 themes related to human resources and curricula content.
- 30 3. Synthesise lessons learned and implications for future design and implementation of  
31 RCEL programmes at scale.  
32  
33  
34  
35  
36  
37

### 38 **METHODS**

39  
40  
41 We took a mixed-methods approach, incorporating quantitative data from an evaluation of  
42 projects in the Saving Brains portfolio alongside qualitative data from in-depth interviews (IDI)  
43 and focus group discussions (FGD) with ECD experts and Saving Brains project leads.  
44  
45  
46  
47

#### 48 **Overview of the Saving Brains Portfolio evaluation**

49  
50 An evaluation of the portfolio was undertaken in 2016-2017 by a team from the London School  
51 of Hygiene & Tropical Medicine in collaboration with the Saving Brains Platform team of  
52 experts, led by TruePoint Center/Harvard University and the WHO.(24) The team evaluated 39  
53 Saving Brains Seed and Transition-To-Scale (TTS) grants awarded between 2012 and 2016 to  
54 project leads from LMIC with variable design and implementation approaches. Seed grants  
55 focused on demonstration of 'proof of concept' over 18-24 months while TTS grants focused  
56  
57  
58  
59  
60

1  
2  
3 on progression towards scale in partnership with other organisations over 3 years. The  
4 portfolio evaluation used a conceptual evaluation framework (Web Appendix Figure A), based  
5 around the Medical Research Council Guidance on Evaluation of Complex Interventions and  
6 was developed around a portfolio-level 'theory of change' to systematically describe and  
7 assess human resource and curricula content implementation factors (Web appendix Figure  
8 B).(25)

## 14 **Objective 1. Quantitative data sources and analyses**

### 17 *Quantitative data sources*

18  
19  
20 Quantitative data on project design and implementation were collected from GCC pre-  
21 specified data collection tools (Web Appendix Table A). Service Delivery Forms (SDFs)  
22 comprised data regarding human resources and RCEL curricula and the Results-based  
23 Management and Accountability Framework (RMAF) comprised data on numbers of recipients  
24 and beneficiaries, child growth and development outcomes, parental and home environment  
25 outcomes, and funding, coverage and context of projects. Data were extracted from SDFs and  
26 RMAFs and imported into Microsoft Excel for cleaning, management and analysis (May-Nov  
27 2016).

### 30 *Quantitative analysis*

31  
32  
33 Descriptive statistics relating to frequency and mode of outcome measurement across the  
34 portfolio were generated using Stata 14 and Microsoft Excel. Data on occupation of workers  
35 delivering the RCEL projects were classified according to the International Standardised  
36 Classification of Occupations (ISCO 2008).(26) For quantitative analysis, projects were grouped  
37 to highlight differences in implementation design factors. Groupings were as follows i) all RCEL  
38 projects ii) standalone RCEL projects and iii) integrated RCEL projects, where 'integrated  
39 projects' were integrated with another domain of the NCF (other than RCEL) and 'standalone  
40 projects' were not.

## 43 **Objective 2: Qualitative data sources and analyses**

### 46 *Literature review and topic guides*

1  
2  
3 IDI and FGD were facilitated using topic guides, which were developed based on a literature  
4 review guided by the Consolidated Criteria for Reporting Qualitative Research (COREQ). The  
5 review explored implementation experiences relating to human resources and curricula  
6 content amongst ECD experts and Saving Brains project leads. Thematic areas of enquiry (Web  
7 Appendix Table B) were established based on the literature, stakeholder consultation, and  
8 analysis of written project proposals and progress reports submitted by project leads to GCC  
9 (Web Appendix Table A). Our analysis was also informed by examples from the literature of  
10 similar efforts to support decision-making for implementation in other maternal and newborn  
11 health (MNH) projects in LMIC.  
12  
13  
14  
15  
16  
17  
18  
19

20  
21 Medline and Embase were searched, with the following MeSH terms; 'Child development' OR  
22 'Developmental Disabilities' AND 'Developing Countries'. Additional articles were retrieved  
23 through reference lists of identified articles and publications from the Saving Brains  
24 community. Grey literature was searched via websites of major multilateral organisations  
25 engaged in ECD programming including the WHO, UNICEF, Save the Children Fund, the World  
26 Bank, World Vision International, other related organisations, and Google.  
27  
28  
29  
30  
31

### 32 *Qualitative data inputs from key informant interviews and focus group discussions*

33  
34

35 Key informants (n=19) were ECD experts implementing ECD programmes in LMICs (Web  
36 Appendix Table C). ECD experts were purposively selected from professional networks  
37 including national and international programmers and policy makers, ECD researchers, Saving  
38 Brains project leads, and members of the Saving Brains Platform and GCC. All key informants  
39 were invited to participate by email. IDI were conducted with key informants and FGD with  
40 Saving Brains project leads, with between 4 and 10 participants per FGD. All participants  
41 provided verbal informed consent and data collection was concluded once saturation was  
42 reached.  
43  
44  
45  
46  
47  
48  
49

50  
51 IDI and FGD were conducted in English (Jun-Oct 2016) and were audio recorded or transcribed  
52 by a member of the evaluation team. Each IDI lasted approximately 60 minutes while each FGD  
53 lasted between 60 and 90 minutes. All IDI and FGD were conducted face-to-face or via an  
54 online video link. Meetings of Saving Brains innovators and partners on prioritising research  
55 in ECD and strategies for implementation of interventions were audio recorded and/or  
56  
57  
58  
59  
60

1  
2  
3 transcribed. Audio recordings of IDI, FGD and meetings were submitted to a third party for  
4 transcription. Members of the Saving Brains evaluation team conducted IDI (MKL, KMM and  
5 VC) and facilitated FGD (CT, KMM, VC) alongside members of the Saving Brains platform.  
6  
7  
8

9  
10 Qualitative data also included Saving Brains project progress reports; written narratives on  
11 implementation challenges and mitigation strategies.  
12  
13

### 14 *Qualitative analysis*

15  
16  
17 Written project documents and transcribed IDI and FGD were de-identified, imported and  
18 coded in NVivo 11. Data were independently coded line-by-line by two members of the  
19 evaluation team (MKL, KMM). An inductive approach was used to create a coding framework,  
20 and thematic content analysis undertaken to explore themes related to human resources and  
21 curricula content until saturation was reached. Inter-rater coding reliability was high on review  
22 of NVivo 11 coding reports.  
23  
24  
25  
26  
27  
28

### 29 **Patient and Public Involvement**

30  
31 This evaluation was conducted without direct patient involvement and they did not contribute  
32 to the interpretation of results or writing and editing of this document. However, families were  
33 frequently involved in different aspects of the design and interpretation of individual projects  
34 within Saving Brains including, but not limited to, the materials used in intervention delivery  
35 and methods for incentivising participation.  
36  
37  
38  
39  
40

### 41 **Ethics approval**

42  
43 The study was approved by the London School of Hygiene & Tropical Medicine Ethics  
44 Committee. Individual Saving Brains projects had relevant ethics approval to conduct their  
45 project.  
46  
47  
48

## 49 **RESULTS**

### 50 **Overview: quantitative and qualitative results**

51  
52  
53 32 of the 39 Seed and TTS projects included some aspect of RCEL (Figure 1); the 7 non-RCEL  
54 projects were not included in this analysis. Of these 32 projects, 35% (n=11) projects were  
55  
56  
57  
58  
59  
60

1  
2  
3 standalone RCEL interventions and 66% (n=21) were integrated with interventions in 'health  
4 and nutrition' (10 projects), 'security and safety' (9 projects) or both (2 projects) (Figure 1).  
5  
6  
7

8 IDI were conducted with 66% (n=21) of Saving Brains project teams including all TTS projects.  
9 Saving Brains TTS project leads provided quantitative data on themes emerging from IDI and  
10 FGDs (Table 1). Emergent themes from the qualitative analysis are presented in Table 2.  
11  
12  
13  
14  
15  
16  
17  
18  
19  
20  
21  
22  
23  
24  
25  
26  
27  
28  
29  
30  
31  
32  
33  
34  
35  
36  
37  
38  
39  
40  
41  
42  
43  
44  
45  
46  
47  
48  
49  
50  
51  
52  
53  
54  
55  
56  
57  
58  
59  
60

For peer review only

**Table 1:** Description of the Saving Brains responsive care and early learning (RCEL) Transition-to-Scale projects: Summary of human resources and curricula content (N=4 projects)

| Project Name                                                              | Transition to scale of an integrated program of nutritional care and psychosocial stimulation to improved malnourished children's development | An integrated intervention targeted at deprived pre-school children in rural areas | Home visiting programs to improve early child development and maternal mental health                  | Saving Brains, Changing Mindsets                                                                  |
|---------------------------------------------------------------------------|-----------------------------------------------------------------------------------------------------------------------------------------------|------------------------------------------------------------------------------------|-------------------------------------------------------------------------------------------------------|---------------------------------------------------------------------------------------------------|
| <b>Lead Institution</b>                                                   | <b>International Centre for Diarrhoeal Disease Research (ICDDR,B)</b>                                                                         | <b>Universidad de los Andes (UDLA)</b>                                             | <b>Faculdade de Medicina da Universidade de Sao Paulo (USP)</b>                                       | <b>Mobile Crèches for Working Mothers' Children (MC)</b>                                          |
| <b>Country</b>                                                            | <b>Bangladesh</b>                                                                                                                             | <b>Colombia</b>                                                                    | <b>Brazil</b>                                                                                         | <b>India</b>                                                                                      |
| <b>Site</b>                                                               | Dhaka area: Narsingdi and Kishoreganj. Rural                                                                                                  | Central rural regions: Boyacá, Cundinamarca, Santander                             | Sao Paulo, urban slums in western area                                                                | Delhi area, Bangalore, Ahmedabad, Chandigarh                                                      |
| <b>Vision/ Goal/ Objectives</b>                                           | Integrate RCEL intervention for poor, underweight children into routine government health services                                            | Improve quality of a pre-existing public parenting programme in a scalable fashion | Evaluate the efficacy and cost-effectiveness of two alternative platforms for home visiting programme | Demonstrate scalability of workplace-based childcare for children of migrant construction workers |
| <b>No. participating children</b>                                         | 1,597                                                                                                                                         | 2,134                                                                              | 800                                                                                                   | 4,845                                                                                             |
| <b>HUMAN RESOURCES</b>                                                    |                                                                                                                                               |                                                                                    |                                                                                                       |                                                                                                   |
| <i>Type</i>                                                               | Assoc Health Professional                                                                                                                     | Lay community member as paraprofessional                                           | CHW and CDA                                                                                           | Personal care worker                                                                              |
| <i>Pre-existing / novel cadre</i>                                         | Pre-existing                                                                                                                                  | Pre-existing                                                                       | CHWs pre-existing, CDAs novel cadre                                                                   | Pre-existing                                                                                      |
| <i>Incentivisation, including remuneration</i>                            | Occasional small gifts.                                                                                                                       | Remunerated by government                                                          | 30% elevated salary pre-existing CHWs, salary-matched CDAs                                            | Salaried                                                                                          |
| <i>Qualification/ skill / competence</i>                                  | Technical qualification                                                                                                                       | Secondary education                                                                | No qualification needed                                                                               | Primary & Secondary education                                                                     |
| <i>Gender of workers</i>                                                  | Majority female                                                                                                                               | Majority female                                                                    | Exclusively female                                                                                    | Majority female                                                                                   |
| <i>Length of training</i>                                                 | 15 days                                                                                                                                       | 85 hrs over 3.5 weeks                                                              | 40 hrs initial (Reach Up) & 32 hrs refresher                                                          | 36 days                                                                                           |
| <i>No. of workers recruited (completing training, delivering project)</i> | 354 (320, 168)                                                                                                                                | 171 (171, 171)                                                                     | 15 (15,13)                                                                                            | 139 (83, 67)                                                                                      |
| <i>Frequency of supervision</i>                                           | Minimum once per month.                                                                                                                       | Every six weeks.                                                                   | Once per week.                                                                                        | Six months rigorous, then monthly.                                                                |
| <b>CURRICULA CONTENT</b>                                                  |                                                                                                                                               |                                                                                    |                                                                                                       |                                                                                                   |
| <i>Group vs individual</i>                                                | 2 or 4-5 dyads                                                                                                                                | 80% grp, 20% individual                                                            | All individual                                                                                        | 70% grp, 30% individual                                                                           |
| <i>Duration of intervention</i>                                           | 12 months                                                                                                                                     | 11 months                                                                          | 12 months                                                                                             | 3 months                                                                                          |
| <i>Average length of sessions</i>                                         | 50 mins                                                                                                                                       | 1 hr                                                                               | 1 hr                                                                                                  | 8 hrs (full creche day)                                                                           |
| <i>Number of sessions</i>                                                 | 25                                                                                                                                            | 55                                                                                 | 24                                                                                                    | 75                                                                                                |
| <i>Freq. of contacts per month</i>                                        | 2                                                                                                                                             | 3                                                                                  | 2                                                                                                     | 25                                                                                                |
| <i>Materials</i>                                                          | Play materials                                                                                                                                | Books, puzzles, images, and toys (recyclable materials)                            | Books, puzzles, images and toys (recyclable materials)                                                | Play materials, blocks, puzzles, big picture books, toys (low cost)                               |
| <i>Curriculum</i>                                                         | Adaptation of Reach Up                                                                                                                        | Adaptation of Reach Up                                                             | Adaptation of Reach Up                                                                                | Thematic curriculum on school readiness skills                                                    |
| <i>Use of digital media</i>                                               | None                                                                                                                                          | None                                                                               | None                                                                                                  | None                                                                                              |
| <i>Mechanism of behaviour change</i>                                      | <i>Mentoring</i>                                                                                                                              | Yes                                                                                | Yes                                                                                                   | Yes                                                                                               |
|                                                                           | <i>Problem-solving</i>                                                                                                                        | Yes                                                                                | Yes                                                                                                   | -                                                                                                 |
|                                                                           | <i>Didactic</i>                                                                                                                               | -                                                                                  | -                                                                                                     | -                                                                                                 |
|                                                                           | <i>Demonstrations</i>                                                                                                                         | Yes                                                                                | Yes                                                                                                   | Yes                                                                                               |
|                                                                           | <i>Service mapping</i>                                                                                                                        | -                                                                                  | -                                                                                                     | -                                                                                                 |
|                                                                           | <i>Empowerment</i>                                                                                                                            | Yes                                                                                | Yes                                                                                                   | Yes                                                                                               |
|                                                                           | <i>Peer support</i>                                                                                                                           | Yes                                                                                | Yes                                                                                                   | -                                                                                                 |
|                                                                           | <i>Media</i>                                                                                                                                  | -                                                                                  | -                                                                                                     | -                                                                                                 |
| <i>Materials</i>                                                          | Yes                                                                                                                                           | -                                                                                  | Yes                                                                                                   | -                                                                                                 |
| <b>Published references</b>                                               | (23, 27, 28)                                                                                                                                  | (23, 29)                                                                           | (23,25)                                                                                               | (23, 30)                                                                                          |

CDA=Child Development Agents, CHW=Community Health Worker

**Table 2:** Themes and sub-themes from quantitative and qualitative data analysis for 32 Saving Brains projects, and 19 key informant in-depth interviews regarding human resources and curricula content for ECD programming

|                              | Themes                                   | Sub-themes                                         |
|------------------------------|------------------------------------------|----------------------------------------------------|
| <b>Human Resources</b>       | 1. Characteristics / selection of worker | 1.1 Health vs other sector                         |
|                              |                                          | 1.2 Integration with existing programmes           |
|                              |                                          | 1.3 Pre-existing government worker vs novel worker |
|                              |                                          | 1.4 Professional vs lay worker                     |
|                              |                                          | 1.5 Qualities and qualifications                   |
|                              | 2. Inducement and retention              | 2.1 Modalities of incentivisation                  |
|                              |                                          | 2.2 Impact on pre-existing workers                 |
|                              | 3. Training and supervision              | 3.1 Content of training                            |
|                              |                                          | 3.2 Flexibility vs fidelity                        |
| 3.3 Education theory         |                                          |                                                    |
| 3.4 Supportive relationships |                                          |                                                    |
| <b>Curricula content</b>     | 4. Content and components                | 4.1 Defining critical components                   |
|                              |                                          | 4.2 Formative work and adaptation                  |
|                              |                                          | 4.3 Flexibility vs fidelity                        |
|                              |                                          | 4.4 Behaviour change                               |
|                              | 5. Delivery, duration and dosage         | 5.1 Adapting delivery to local context             |
|                              |                                          | 5.2 Intervention duration and dosage               |
|                              |                                          | 5.3 Retention of participants                      |

### Human resources in ECD projects: themes and sub-themes

Three major human resources themes and eleven sub-themes were identified (Table 2).

#### 1. Characteristics / selection of workers

Variation in workforce across the Saving Brains portfolio is summarised in Figure 2. The use of health or associate health professionals, such as community health workers (CHW), was common. Health professionals commonly delivered projects that included health and nutrition domains (Figure 2a). Lay community members were also common as frontline workers across all project types.

Integrating ECD projects into existing programmes was identified by informants as a key challenge.

1  
2  
3        *"Early child development is harder than anything because of its integrated nature.... ..we*  
4        *all decided that services had to be fully integrated....and this has imposed an operational*  
5        *burden that is very complicated."* – Saving Brains TTS project lead  
6  
7  
8  
9

10        Approximately one third of workers (34% n=11/32) had either only primary school-level or no  
11        education (Figure 2b). Tertiary-level education of workers was more common for RCEL projects  
12        which included health and nutrition domains (42%, n=5) (Figure 2b), likely reflecting the  
13        greater representation of healthcare professionals delivering these integrated interventions.  
14  
15  
16

17  
18        Soft skills including interpersonal and communication skills were identified as important by  
19        project leads.  
20  
21

22  
23        *"We have learned a lot about the type of person that can fill the health promoter role. It is*  
24        *important that he/she is committed to the project, responsible, and loves working with kids,*  
25        *especially this age group."* – Saving Brains Seed project lead  
26  
27  
28

29        *"Having a champion in the field is crucial for success...combination of strength and*  
30        *kindness; excellent interpersonal skills; problem solver; works with all stakeholders."* –  
31        Saving Brains TTS project lead  
32  
33  
34

35  
36        A key choice in ECD implementation was whether to use established or novel cadres of worker.  
37        In some projects, novel cadres of worker were recruited to support quality of implementation.  
38        However, limitations of this approach were acknowledged with regards to sustainability.  
39  
40  
41

42        *"...even after identifying and training them there is no assurance that the government*  
43        *will take up the process."* – Saving Brains TTS project lead  
44  
45  
46

47        Conversely, while a number of projects used pre-existing frontline workers, key informants also  
48        expressed concerns regarding direct control over recruitment, incentivisation, supervision, and  
49        training when shared with a partner organisation (Web Appendix Table D, ICDDR,B & USP).  
50        The increased burden, change in focus, and challenge in coordination for pre-existing salaried  
51        workers was also highlighted by experts and project teams.  
52  
53  
54  
55  
56  
57  
58  
59  
60



1  
2  
3  
4  
5  
6  
7  
8  
9  
10  
11  
12  
13  
14  
15  
16  
17  
18  
19  
20  
21  
22  
23  
24  
25  
26  
27  
28  
29  
30  
31  
32  
33  
34  
35  
36  
37  
38  
39  
40  
41  
42  
43  
44  
45  
46  
47  
48  
49  
50  
51  
52  
53  
54  
55  
56  
57  
58  
59  
60

*"It's a big challenge...you take a health worker and add a 24<sup>th</sup> task to her 23<sup>rd</sup> task, which are requested by six different funders with no coordination between any of them." - ECD Lead for an International NGO*

*"They think [to themselves], 'I'm dealing with dengue and Zika and you expect me to play with a child for an hour.'" - Saving Brains TTS project lead*

## 2. Provision of incentives based on performance (inducement)

Overall, most (61%) project workers were salaried (Figure 2c). However, lay community members were the least frequently remunerated worker type, with 20% of projects offering them no incentives, and a further 20% offering only a contribution to expenses (Figure 2c). Key informants expressed a range of opinions about remuneration of CHWs. Some cited elevated status within the community and personal satisfaction as a non-financial incentivisation. In contrast, concerns were expressed regarding sustainability and human rights implications of implementation models that relied on voluntary workers, who were often socially disadvantaged women. However, all health and most allied health professionals were salaried and financial remuneration for these groups was considered a key part of inducement.

*"Asking clinic staff to conduct the sessions meant additional tasks for them and they had to spend longer hours in the clinic. They therefore had expectations to be paid some wages for this extra task, but our goal was to integrate the activity into their daily routine hours to make it sustainable." - Saving Brains TTS project lead*

Staff recruitment and retention was a major recurring theme. Of the 2,598 workers recruited to deliver ECD interventions across the Saving Brains RCEL projects, 2,473 (95%) completed initial training and, of those trained, 2,197 (85%) ultimately delivered the intervention (Figure 2d). Across the portfolio, retention was most challenging amongst salaried staff who were mostly health staff with 67% of salaried workers trained delivering the intervention (Figure 2d). Specific reasons for drop-off were not available from existing data.

During programme planning, several teams described strategies including 'over-recruitment' to allow for anticipated staff attrition.

1  
2  
3 *"In this next phase, we trained many more promoters than we needed, approximately*  
4 *twice as many as we originally needed in order to have a healthy resource base."* – Saving  
5 Brains Seed project lead  
6  
7

8  
9  
10 *"It was hard to get [the staff], but we were very successful in keeping them. ... We paid*  
11 *them well which is something that I don't know that the government will be able to do.*  
12 *They also had a lot of support and a lot of training. They really appreciated all that they*  
13 *received from our team..."* – Saving Brains TTS project lead  
14  
15  
16

### 17 18 3. Training and supervision

19  
20 A wide variation in supervision frequency, duration and ratios, and training structure and  
21 duration was seen across projects (Table 3).  
22  
23

24  
25 **Table 3:** Supervision and training of workers delivering responsive care and early learning Saving Brain  
26 projects  
27

|                                                                      | Median      | Range  | Inter-quartile range |
|----------------------------------------------------------------------|-------------|--------|----------------------|
| <b>Number of days in training (N=31)</b>                             | 10          | 0-90   | 5-13.6               |
| <b>Number of trainees per workshop (N=31)</b>                        | 10          | 0-50   | 5-20                 |
| <b>Frequency of supervision (N=28)</b>                               | 2 per month | 0-10   | 1.5-4                |
| <b>Duration of supervision (N=27)</b>                                | 2 hours     | 0-8    | 1-4                  |
| <b>Ratio of supervisor to trainee during training session (N=20)</b> | 3:20        | 0.04-2 | 0.1-0.2              |

28  
29  
30 \*Data from Saving Brains standardised programme reporting 'Service Delivery Form'. Missing data for 1 project  
31 on number of days in training and number of trainees per workshop, 4 projects did not report on frequency of  
32 supervision and 5 projects on duration. 12 projects did not report on the ratio of supervisor to trainee.  
33  
34  
35  
36  
37  
38

39  
40  
41  
42  
43  
44 Training and supervision emerged as major themes during qualitative analysis (Table 2). Within  
45 training, the need to not only address details of ECD curricula but also a diverse range of  
46 related issues including pedagogy, strategies for managing the emotional load of work and  
47 administrative requirements, communication skills, and problem-solving abilities were  
48 identified. Several key informants also highlighted the value of observational supervision.  
49  
50  
51  
52

53  
54 *"...not only to see that content is delivered but that it is delivered in a way that parents*  
55 *will be responsive to."* – Saving Brains TTS project lead  
56  
57  
58  
59  
60

1  
2  
3 The importance of flexible training and supervision protocols that were feasible for staff who  
4 had multiple roles and were likely to be sustainable with scale-up was also emphasised.  
5  
6

7  
8 *"Ongoing training including proficiency evaluations and feedback build confidence in*  
9 *participating community health workers to apply the tools and methodologies to deal with*  
10 *mothers and children. We have learned this over the years of work with community health*  
11 *workers and plan to systematize the work into teaching protocols as part of the transition*  
12 *to scale phase."* – Saving Brains TTS project lead  
13  
14  
15  
16

17  
18 Key informants highlighted the need to develop formal structures for high-quality supportive  
19 training and supervision at all staff levels; this was particularly important in maintaining fidelity  
20 during intervention scale-up (Web Appendix Table D). In addition, discussions emphasised the  
21 importance of peer support amongst workers (Web Appendix Table D).  
22  
23  
24  
25

## 26 **Curricula content: themes and sub-themes**

27  
28  
29 Two major themes and seven sub-themes were identified with respect to curricula content  
30 (Table 2).  
31  
32

### 33 *4. Content and components*

34  
35  
36  
37 Improved understanding of the critical components of RCEL interventions was a major theme  
38 identified by key informants as crucial to sustainability and scale-up.  
39

40  
41  
42 Many projects provided general descriptions of content (e.g. parenting programme,  
43 responsive parenting, nutrition) or the original curriculum from which their project was  
44 developed (commonly the established Jamaican 'Reach Up' curricula) (Table 1). (21) However,  
45 for many the critical components were less well defined and described. Specifically, details of  
46 activities for different ages or developmental stages, child health or nutrition components,  
47 behavioural change approaches used, pedagogy, and materials were typically limited. Lack of  
48 an established and standardised framework for describing curricula content was identified by  
49 key informants as a barrier to improved reporting and understanding design factors  
50 responsible for impact.  
51  
52  
53  
54  
55  
56  
57  
58  
59  
60

1  
2  
3 The importance of formative research and piloting for development and adaptation of  
4 interventions to setting was highlighted.  
5  
6

7  
8 *"Project development is also really important...these projects are not 'off-the-shelf'*  
9 *'ready-to-go'."* – ECD expert  
10

11  
12 Additionally, the importance of balancing project flexibility, fidelity and content heterogeneity  
13 with clear, specific and structured curricula was emphasised.  
14  
15

16  
17 *"The other determinant of success I would say is... we were able to develop a*  
18 *contextualized project, delivery product and processes."* – Saving Brains Seed project lead  
19  
20

21  
22 Specific materials and activities often required guided cultural adaptation to maintain fidelity  
23 (Web Appendix Table D). However, it is important to note that key informants placed equal  
24 emphasis on behaviour change mechanisms as well as on specific curricula activities and  
25 materials.  
26  
27

28  
29  
30 *"Key components [were] inspiration, confidence... empathy, attachment of mothers and*  
31 *children to the deliverer...assessment for change."* – Saving Brains Seed project lead  
32  
33

### 34 35 5. Delivery, duration and dosage

36  
37 The importance of project delivery, duration and dosage emerged as a major theme in the  
38 analysis. Figure 3 summarises the method and duration of delivery of ECD interventions. The  
39 proportion using groups to deliver the intervention was highest amongst standalone RCEL  
40 projects and lowest amongst integrated approaches (Figure 3a). Duration of sessions generally  
41 lasted longer for groups than individual visits (Figure 3b).  
42  
43

44  
45  
46  
47 ECD investigators reported that the decision regarding group or individual delivery approach  
48 was influenced more by context, efficiency, and feasibility than effectiveness.  
49  
50

51  
52 *"Our problem...was trying to do something that we thought was evidence based, but that*  
53 *was not a good fit with the socio-political structures and the way people are comfortable*  
54 *in trying new things."* – Saving Brains Seed project lead  
55  
56  
57  
58  
59  
60

Key informants highlighted 'dosage' of the intervention as an important design decision. The median number of project sessions delivered, length of sessions, and length of intervention, ranged broadly (Table 4).

**Table 4:** Summary of project sessions including duration and intensity amongst responsive care and early learning Saving Brain projects (n=32)

|                                            | Median      | Range           | Inter-quartile range |
|--------------------------------------------|-------------|-----------------|----------------------|
| <b>Number of project sessions (N=29)</b>   | 24 sessions | 2-192 sessions  | 11-37 sessions       |
| <b>Total length of intervention (N=26)</b> | 12 months   | 1-24 months     | 8-12 months          |
| <b>Length of sessions (N=26)</b>           | 1 hour      | 10 mins-8 hours | 45-90 minutes        |

Data from Saving Brains standardised programme reporting 'Service Delivery Form'. Missing data on number of project sessions for three projects, and on total length of intervention and length of sessions for six projects.

The majority (60%, n=19) of projects were primarily targeted at the child or caregiver level as opposed to targeting families or the community more broadly. Geographical, political and economic factors were important in engaging target populations.

*"...some mothers find it difficult to come to the clinics for the fortnightly sessions. The reasons were lack of time, distance from the clinic, not allowed by the father or grandparents of the child and occasionally travelling outside the area."* – Saving Brains

TTS project lead

Project teams used a range of methods to incentivise caregivers to attend sessions. One TTS team trialled both provision of oil supplementation and 'motivational meetings' (Table 1, ICDDR,B); both methods were found to be effective but motivational meetings were adopted due to sustainability.

## DISCUSSION

This is the first paper to report on workforce data from a large multi-country child development portfolio, including 32 RCEL projects with 2,197 workers delivering interventions across 17 LMIC. This analysis addresses human resources and curricula content for implementation at scale; it is noted that these factors do not stand in isolation but interact with each other and other programme design factors as well as with local contexts. We build on the Saving Brains portfolio exploration by *Radner et al.*, which highlights that workforce decisions around delivery of RCEL programmes can have substantial bearings on programme

1  
2  
3 sustainability and impact, to further probe specifics of workforce choices in ECD programme  
4 implementation, particularly from a health sector perspective.(13, 23) Resultant themes and  
5 sub-themes resonate with and extend existing literature regarding workforce choices,  
6 particularly the community health workforce, for programme implementation in LMIC settings.  
7  
8  
9

10  
11 Workforce factors are one of the most critical impediments to implementation at scale. This is  
12 well recognised for ECD programmes, especially given intersectoral complexities. Our results  
13 suggest that whilst challenges exist for integrating ECD into existing services, introducing novel  
14 cadres of worker for standalone ECD programmes may be also challenging at scale. Within  
15 this analysis, challenges related to adding ECD workstreams to the existing workload of  
16 established frontline workers were clearly reported and may have contributed to poorer  
17 retention of salaried health workers, alongside rotation of health workers. This finding has  
18 been mirrored across the implementation literature in other areas of global health; for  
19 example, an economic analysis of community based maternal and newborn care (CBMNC)  
20 across seven countries highlighted trade-offs between improved cost-effectiveness associated  
21 with use of existing multipurpose workers and difficulties related to overburdening those  
22 workers.(31-35)  
23  
24  
25  
26  
27  
28  
29  
30  
31  
32  
33

34 Ongoing supportive supervision, not just initial training, was found to be crucial to intervention  
35 quality and fidelity, as has been found in global health more broadly. For example, quality  
36 supervision was emphasised as central to preservation of project quality as well as worker  
37 motivation in the CBMNC analyses, and was examined in more detail in several of these  
38 evaluations, including the cluster randomised controlled Goodstart (III) trial of maternal and  
39 newborn (MNH) care in South Africa.(32, 36) Similarly, supervision and training, and particularly  
40 the potential of e-supervision/training, were highlighted as key concerns for project feasibility  
41 in a review of interventions for children with intellectual disabilities (37) and additionally were  
42 found to be critical for sustainable scale and impact in both PRIME and a follow-up study of a  
43 cluster randomized trial of a psychosocial ECD project in Colombia.(33, 38, 39)  
44  
45  
46  
47  
48  
49  
50  
51  
52  
53

54 The challenge of retention of workers emerged as an important theme and is also not isolated  
55 to ECD. Within the Saving Brains portfolio, strategies used to mitigate against poor retention  
56 echoed findings in other global health implementation research including; over-recruitment,  
57 fast-track training, and provision of high-quality training and supervision.(33, 36, 39) *Andrew*  
58  
59  
60

1  
2  
3 *et al* suggest designing interventions according to geographical practicalities and other  
4 contextual factors to mitigate staff turnover, and thus optimise project quality and impact.(38)  
5  
6 There is appetite for shared learning to help tackle the human resource challenges highlighted  
7 in this paper, and resources such as the Early Childhood Workforce Initiative provide a useful  
8 platform for ECD policymakers and programmers globally to work together.(40, 41)  
9  
10

11  
12  
13 Regarding essential ECD intervention curricula and components for scale-up, commonalities  
14 were seen amongst the larger TTS projects which add to previous literature on this topic.(6,  
15 14) However, there is no agreed standard package for ECD set out by the UN, contributing to  
16 project heterogeneity and precluding clear guidance for policymakers and programmers on  
17 ECD intervention content. This lack of standardised content is in contrast to more biomedical  
18 programmes, such as antenatal and postnatal care packages, as well as broader mental health  
19 and nutrition programmes which, though similar to ECD in their intersectoral nature, do have  
20 some standardised content, such as the WHO and UNICEF's Infant and Young Child Feeding  
21 approach.(31, 42, 43) While lack of description of intervention content in this portfolio hinders  
22 specific recommendations for a standardised ECD curricula, our findings suggest that the focus  
23 of a standardised ECD curricula should be on engaging parents in activities which promote  
24 development, rather than providing information on developmental milestones, as is seen in  
25 many countries.  
26  
27  
28  
29  
30  
31  
32  
33  
34  
35  
36

37  
38 Even with a standard package, contextualisation would be important, and our findings  
39 underline the need for formative research. Across the Saving Brains portfolio, there was a  
40 noticeable lack of in-depth description of curricula content, despite key informants  
41 highlighting this as important for sustainability.(14, 15) A framework for describing  
42 contextualised content of RCEL projects using, for example, parameters described by *Aboud et*  
43 *al* (information, performance, problem-solving, social support, materials and media) would  
44 provide clarity in the literature and strengthen programme comparison and evaluation.(14, 44)  
45  
46 Further, as the NCF proposes, delineating ECD programmes more clearly into universal,  
47 targeted, and indicated packages to respond to the specific needs of children at particular  
48 developmental risk or with developmental disabilities would support better inclusion of  
49 children who otherwise risk not being reached by universal or conventional service models.(9,  
50 45-47) As *Boggs et al* highlight, improved developmental monitoring is critical, and ECD  
51 workers have a vital role to play in identifying the young children most at risk of developmental  
52  
53  
54  
55  
56  
57  
58  
59  
60

1  
2  
3 difficulty and referring for ECD intervention, as well as in intervention delivery.(21) While there  
4 is little published literature on early intervention to improve health and developmental  
5 outcomes for children with disabilities in LMIC, trials are underway and emerging models that  
6 have been adapted and that are being trialled in the context of the Zika epidemic may be  
7 informative.(48, 49)  
8  
9  
10  
11

12  
13 Regarding delivery strategy, group sessions were frequently favoured across the Portfolio,  
14 notably based on increased practicality, efficiency, and acceptability, rather than increased  
15 effectiveness.(23) Previous evidence for both ECD and health programmes supports the use of  
16 a combination of home visits and group sessions as more effective in terms of information  
17 consolidation and parental behavioural change.(10, 14, 50) Intervention dosage was variable  
18 across the Portfolio and the need for flexibility in this when adapting to different contexts, for  
19 example during implementation of the 'Reach Up' package in Brazil, frequently emerged  
20 during analysis.(51) Dosage variability was similarly reported during the Goodstart (III) trial and  
21 was attributed to contextual and workforce factors including occupation, remuneration, and  
22 community recognition of workers.(36)  
23  
24  
25  
26  
27  
28  
29  
30  
31

### 32 **Strengths and Limitations**

33  
34  
35 Many of the limitations of this evaluation are common to ECD programming more broadly.  
36 Several process-related metrics were not commonly reported including coverage, equity, and  
37 cost-effectiveness, likely influenced by the small-scale and 'proof of concept' nature of most  
38 projects.(39) The donor-facing system of data collection and reporting within the portfolio  
39 may have introduced bias, with investigators feeling obliged to report positively, however the  
40 open learning culture within the Saving Brains Platform acted to substantially reduce this.  
41 Grant awardees were selected by GCC and so projects and their aims may reflect funder  
42 priorities. Enhancing linkages between implementation processes and impacts within this  
43 portfolio and more broadly has the potential to strengthen evidence to inform policy and  
44 programming. Additionally, while this paper describes design decisions, there was not scope  
45 to explore the reasons behind these decisions. Exploration of these reasons may contribute to  
46 stronger and clearer evidence, policy and programming.  
47  
48  
49  
50  
51  
52  
53  
54  
55  
56  
57

### 58 **CONCLUSION**



1  
2  
3 We have reported on the largest study to date of workforce and curricula content for ECD from  
4 a large and varied portfolio of 32 projects, providing a new synthesis about implementation  
5 challenges and enablers for ECD programming. Clear themes have emerged with parallels to  
6 LMIC programmatic learning in other areas, such as global mental health and nutrition.  
7 Development of a more standardised package or planning guide for ECD programmes would  
8 mitigate some of the challenges reported here, but programmes still need to be adapted to  
9 context. Carrying out and learning from such adaptation could be supported by a common  
10 framework for describing content and delivery strategies. More systematic evaluations of  
11 implementation costs, including worker costs will be essential inputs for planning of routine  
12 ECD programmes, within and beyond the health sector. There is currently a policy window for  
13 investment in ECD, enabled by the NCF, and practical evidence and data are essential to ensure  
14 that those investments are as effective as possible to reach all children, everywhere.(9)  
15  
16  
17  
18  
19  
20  
21  
22  
23  
24  
25

#### 26 **AUTHOR CONTRIBUTIONSHIP STATEMENT**

27  
28  
29 The first draft of the paper was undertaken by CJT, MKL and VPH. Other specific contributions  
30 were made by RB, SB, AB, VC, EG, JH, RH, KM, KM, RD, KS, and JEL. The Expert Advisory Group  
31 (Pia Britto, Tarun Dua, EG, SGM, Melissa Gladstone, JH, RH, KM, James Radner, Muneera  
32 Rasheed, KS, Arjun Upadhyay) contributed to the conceptual process throughout. All authors  
33 reviewed and agreed on the final manuscript.  
34  
35  
36  
37  
38

#### 39 **ACKNOWLEDGEMENTS**

40  
41  
42 We thank all the investigators, participants and researchers involved in projects included in the  
43 Saving Brains portfolio and evaluation. We thank Grand Challenges Canada as funder of  
44 unpublished data. We thank the Expert Advisory Group for their guidance; and we are grateful  
45 to Claudia da Silva for administrative assistance.  
46  
47  
48  
49

#### 50 **COMPETING INTERESTS**

51  
52  
53 No competing interests.  
54  
55

#### 56 **FUNDING**

1  
2  
3 This paper has been made possible by funding support from the Bernard van Leer Foundation.  
4  
5 The Saving Brains impact and process evaluation was funded by Grand Challenges Canada.  
6  
7 Grand Challenges Canada is funded by the Government of Canada.  
8  
9

## 10 **DISCLAIMER**

11  
12 The authors alone are responsible for the views expressed in this article and they do not  
13  
14 necessarily represent the views, decisions or policies of the institution with which they are  
15  
16 affiliated.  
17

## 18 **Data sharing**

19  
20 Supplementary data have been published online and may also be accessed by emailing  
21  
22 cally.tann@lshtm.ac.uk.  
23  
24  
25  
26  
27  
28  
29  
30  
31  
32  
33  
34  
35  
36  
37  
38  
39  
40  
41  
42  
43  
44  
45  
46  
47  
48  
49  
50  
51  
52  
53  
54  
55  
56  
57  
58  
59  
60

## REFERENCES

1. Engle P, Black M, Behrman J, Cabral de Mello M, Gertler P, Kapiriri L, et al. Strategies to avoid the loss of developmental potential in more than 200 million children in the developing world. *Lancet*. 2007;369(9557):229-42.
2. Yousafzai A, Rasheed M, Daelmans B, Manji S, Arnold C, Lingam R, et al. Capacity building in the health sector to improve care for child nutrition and development. *Ann N Y Acad Sci*. 2014;1308(1):172-82.
3. Black M, Walker S, Fernald L, Andersen C, DiGirolamo A, Lu C, et al. Early childhood development coming of age: science through the life course. *Lancet*. 2016;389(10064):77-90.
4. United Nations. Sustainable Development Goals 2015.
5. Every Woman Every Child. The Global Strategy for Women's, Children's and Adolescents' Health (2016-2030). 2015.
6. Daelmans B, Black M, Lombardi J, Lucas J, Richter L, Silver K, et al. Effective interventions and strategies for improving early child development. *BMJ*. 2015;351:h4029.
7. Yousafzai A, Obradović J, Rasheed M, Rizvi A, Portilla X, Tirado-Strayer N, et al. Effects of responsive stimulation and nutrition interventions on children's development and growth at age 4 years in a disadvantaged population in Pakistan: a longitudinal follow-up of a cluster-randomised factorial effectiveness trial. *Lancet Glob Health*. 2016;4(8):e548-e58.
8. Britto P, Lye S, Proulx K, Yousafzai A, Matthews S, Vaivada T, et al. Nurturing care: promoting early childhood development. *Lancet*. 2016;389(10064):91-102.
9. World Health Organisation. Nurturing Care Framework. 2018.
10. Engle P, Fernald L, Alderman H, Behrman J, O'Gara C, Yousafzai A, et al. Strategies for reducing inequalities and improving developmental outcomes for young children in low-income and middle-income countries. *Lancet*. 2011;378(9799):1339-53.
11. Aboud F, Yousafzai A, Nores M. State of the science on implementation research in early child development and future directions. *Ann N Y Acad Sci*. 2018;1419(Special Issue: Implementation Research and Practice for Early Childhood Development):264-71.
12. Yousafzai A, Aboud F. Review of implementation processes for integrated nutrition and psychosocial stimulation interventions. *Ann N Y Acad Sci*. 2014;1308(1):33-45.
13. Neuman M, Kimberly J, Chua P. A Review of the Literature: early childhood care and education (ECCE) personnel in low- and middle-income countries. . Paris: UNESCO; 2015.
14. Aboud F, Yousafzai A. Global health and development in early childhood. *Ann Rev Psychol*. 2015;66:433-57.
15. Frongillo E, Tofail F, Hamadani J, Warren A, Mehrin S. Measures and indicators for assessing impact of interventions integrating nutrition, health, and early childhood development. *Ann N Y Acad Sci*. 2014;1308(1):68-88.
16. Advancing Early Child Development: from Science to Scale. *Lancet*; 2016.
17. Special Issue: Implementation Research and Practice for Early Childhood Development. In: Yousafzai A, Aboud F, Nores M, Britto P, editors. *Annals of the New York Academy of Sciences* 2018.
18. Milner K, Bernal R, Brentani A, Britto P, Dua T, Gladstone M, et al. Contextual design choices and partnerships for scaling early child development programmes. *Arch Dis Child*. 2019;104(Suppl 1):S3-12.
19. Arregoces L, Hughes R, Tann C, Ponce Hardy V, Upadhyay A, Lawn J. Accountability for funds for Nurturing Care: what can we measure? *Arch Dis Child*. 2019;104(Suppl 1):S34-42.
20. Milner K, Bhopal S, Dua T, Gladstone M, Hamadani J, Hughes R, et al. Counting outcomes, coverage and quality for early child development programmes. *Arch Dis Child*. 2019;104(Suppl 1 ):S13-21.
21. Boggs D, Milner K, Chandna J, Black M, Cavallera V, Dua T, et al. Rating early child development outcome measurement tools for routine health programme use. *Arch Dis Child*. 2019;104(Suppl 1):S22-33.
22. Cavallera V, Tomlinson M, Radner J, Coetzee B, Daelmans B, Hughes RC, et al. Scaling early child development: what are the barriers and enablers? *Arch Dis Child*. 2019;104(Suppl 1):43-50.
23. Radner J, Ferrer M, McMahon D, Shankar A, Silver K. Practical considerations for transitioning early childhood interventions to scale: lessons from the Saving Brains portfolio. *Ann N Y Acad Sci*. 2018;1419(Special issue: Implementation Research and Practice for Early Childhood Development):230-48.
24. Milner K, Kohli-Lynch M, Tann C, Lawn J, On behalf of the Expert Advisory Group and Saving Brains Platform. *Saving Brains Portfolio Impact and Process Evaluation Report*. London, United Kingdom: London School of Hygiene & Tropical Medicine; 2016.

- 1  
2  
3 25. Moore GF, Audrey S, Barker M, Bond L, Bonell C, Hardeman W, et al. Process evaluation of complex  
4 interventions: Medical Research Council guidance. *BMJ : British Medical Journal*. 2015;350.  
5 26. International Standard Classification of Occupations. ISCO-08. Geneva: International Labour Office;  
6 2012.  
7 27. Hamadani J, Mehrin S, Tofail F, Hazan M, Huda S, Baker-Henningham H, et al. Integrating an early  
8 childhood development programme into the Bangladeshi Primary Health Care Services: A cluster randomised  
9 trial. *Lancet Glob Health*. 2018.  
10 28. Hamadani J, Nahar B, Huda S, Tofail F. Integrating early child development programs into health and  
11 nutrition services in Bangladesh: benefits and challenges. *Ann N Y Acad Sci*. 2014;1308(1):192-203.  
12 29. Attanasio O, Baker-Henningham H, Bernal R, Meghir C, Pineda D, Rubio-Codina M. Early Stimulation  
13 and Nutrition: the impacts of a scalable intervention. NBER Working Paper. 2018(25059).  
14 30. Bajaj M, Sharma S. Scaling-up early childhood centres for migrant construction workers' children in  
15 India. *Early Childhood Matters*. 2016;125:74-9.  
16 31. Lawn J, Bhutta Z, Wall S, Ptereson S, Daviaud E. Cadres, content and costs for community-based care  
17 for mothers and newborns from seven countries: implications for universal health coverage. *Health Policy Plan*.  
18 2017;32(Special Issue (Community-based maternal & newborn care economic analysis: Multi-country analysis  
19 of costs and health systems with implications for scale up)):i1-i5.  
20 32. Daviaud E, Owen H, Pitt C, Kerber KJ, Bianchi Jassir F, Barger D, et al. Overview, methods and results of  
21 multi-country community-based maternal and newborn care economic analysis. *Health Policy Plan*.  
22 2017;32(Special Issue (Community-based maternal & newborn care economic analysis: Multi-country analysis  
23 fo costs and health syystems with implications for scale up)):i6-i20.  
24 33. Mendenhall E, de Silva M, Hanlon C, Petersen I, Shidhaye R, Jordans M, et al. Acceptability and feasibility  
25 of using non-specialist health workers to deliver mental health care: Stakeholders perceptions from the PRIME  
26 district sites in Ethiopia, India, Nepal, South Africa, and Uganda. *Soc Sci Med*. 2014;118:33-42.  
27 34. Tomlinson M, Hunt X, Rotheram-Borus M. Diffusing and scaling evidence-based interventions: eight  
28 lessons for early child development from the implementation of perinatal home visiting in South Africa. *Annals  
29 of the New York Academy of Sciences*. 2018;1419(Special Issue: Implementation Research and Practice for Early  
30 Childhood Development):218-29.  
31 35. Black R, Taylor C, Arole S, Bang A, Bhutta Z, Chowdhury A, et al. Comprehensive review of the evidence  
32 regarding the effectiveness of community-based primary health care in improving maternal, neonatal and child  
33 health: 8. summary and recommendations of the Expert Panel. *J Glob Health*. 2017;7(1):010908.  
34 36. Daviaud E, Nkonki L, Ijumba P, Doherty T, Lawn J, Owen H, et al. South-Africa (Goodstart III) trial:  
35 community-based maternal and newborn care economic analysis. *Health Policy Plan*. 2017;32(Special Issue  
36 (Community-based maternal & newborn care economic analysis: Multi-country analysis of costs and health  
37 systems with implications for scale up)):i53-i63.  
38 37. Reichow B, Servili C, Taghi Yasamy M, Barbui C, Saxena S. Non-Specialist Psychosocial Interventions for  
39 Children and Adolescents with Intellectual Disability or Lower-Functioning Autism Spectrum Disorders: A  
40 Systematic Review. *PLoS Med*. 2013;10(12):e1001572.  
41 38. Andrew A, Attanasio O, Fitzsimons E, Grantham-McGregor S, Meghir C, Rubio-Codina M. Impacts 2  
42 years after a scalable early childhood development intervention to increase psychosocial stimulation in the  
43 home: A follow-up of a cluster randomized controlled trial in Colombia. *PLoS Med*. 2018;15(4).  
44 39. Lund C, Tomlinson M, de Silva M, Fekadu A, Shidhaye R, Jordans M, et al. PRIME: A Programme to  
45 Reduce the Treatment Gap for Mental Disorders in Five Low- and Middle-Income Countries. *PLOS One*.  
46 2012;9(12).  
47 40. Early Childhood Workforce Initiative 2019 [Available from:  
48 <https://www.earlychildhoodworkforce.org/>].  
49 41. Mitter R, Putcha V. Strengthening and Supporting the Early Childhood Workforce: Training and  
50 professional development. Washington DC: Results for Development; 2018.  
51 42. World Health Organisation. Nutrition - Infant and young child feeding 2019 [cited 2019. Available from:  
52 [https://www.who.int/nutrition/publications/infant\\_feeding/en/](https://www.who.int/nutrition/publications/infant_feeding/en/)].  
53 43. World Health Organisation. Mental Health 2019 [cited 2019. Available from:  
54 [https://www.who.int/mental\\_health/en/](https://www.who.int/mental_health/en/)].  
55 44. Yousafzai A, Rasheed M, Siyal S. Integration of parenting and nutrition interventions in a community  
56 health program in Pakistan: an implementation evaluation. *Ann N Y Acad Sci*. 2018;1419(Special Issue:  
57 Implementation Research and Practice for Early Childhood Development):160-78.  
58 45. Yousafzai A, Lynch P, Gladstone M. Moving beyond prevalence studies: screening and interventions for  
59 children with disabilities in low-income and middle-income countries. *Arch Dis Child*. 2014;99(9):840-8.  
60

- 1  
2  
3 46. Kuper H, Smythe T, Duttine A. Reflections on Health Promotion and Disability in Low and Middle-Income Countries: Case Study of Parent-Support Programmes for Children with Congenital Zika Syndrome. *Int J Environ Res Public Health*. 2018;15(3).
- 4  
5  
6 47. Zuurmond M, Nyanta G, Baltussen M, Seeley J, Abanga J, Shakespeare T, et al. A support programme for caregivers of children with disabilities in Ghana: Understanding the impact on the wellbeing of caregivers. *Child Care Health Dev*. 2018;45(1):45-53.
- 7  
8  
9 48. Benfer K, Novak I, Morgan C, Whittingham K, Khan N, Ware R, et al. Community-based parent-delivered early detection and intervention programme for infants at high risk of cerebral palsy in a low-resource country (Learning through Everyday Activities with Parents (LEAP-CP): protocol for a randomised controlled trial. *BMJ Open*. 2018;8.
- 10  
11  
12 49. ISRCTN Current Controlled Trials [Internet]. Improving early detection and intervention for young infants at high risk of neurodevelopmental delay and disability in Uganda London: BioMed Central; 2018 Nov 22 [cited 2018 Dec 12]. Available from: <http://www.isrctn.com/ISRCTN44380971>.
- 13  
14  
15 50. Rockers P, Barnighausen T. Interventions for hiring, retaining and training district health systems managers in low- and middle-income countries. *Cochrane Database Syst Rev*. 2013;4:CD009035.
- 16  
17  
18 51. Smith J, Baker-Henningham H, Brentani A, Mugweni R, Walker S. Implementation of Reach Up early childhood parenting program: acceptability, appropriateness, and feasibility in Brazil and Zimbabwe. *Ann N Y Acad Sci*. 2018;1419(Special Issue: Implementation Research and Practice for Early Childhood Development):1-21.
- 19  
20  
21  
22  
23  
24  
25  
26  
27  
28  
29  
30  
31  
32  
33  
34  
35  
36  
37  
38  
39  
40  
41  
42  
43  
44  
45  
46  
47  
48  
49  
50  
51  
52  
53  
54  
55  
56  
57  
58  
59  
60

Figure 1: Project inclusion flow chart: inclusions and subsets of responsive care and early learning projects from the Saving Brains portfolio (n=39)

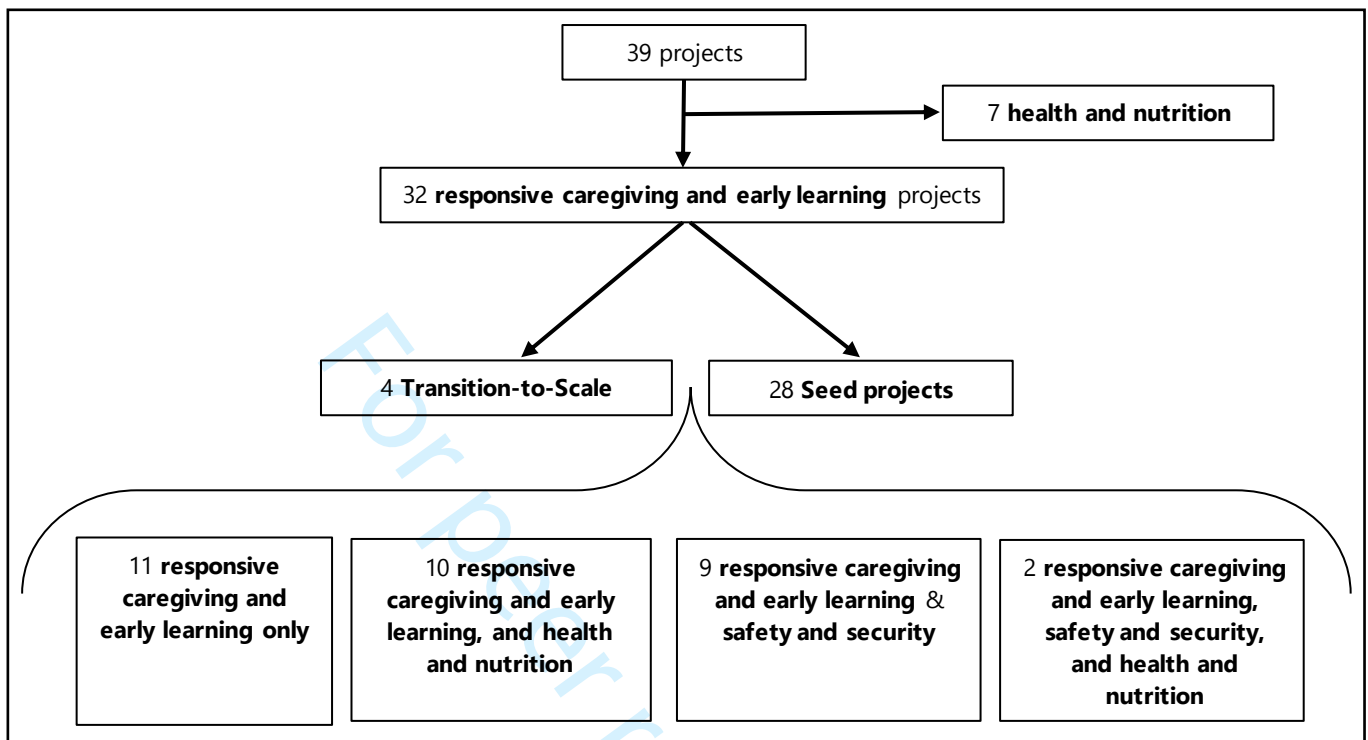

**Figure 2: Occupation, incentivisation, qualification and retention of frontline workers amongst Saving Brains portfolio responsive care and early learning (RCEL) projects**

*a) Occupation of frontline worker delivering responsive care and early learning (RCEL) projects by type of RCEL intervention project.*

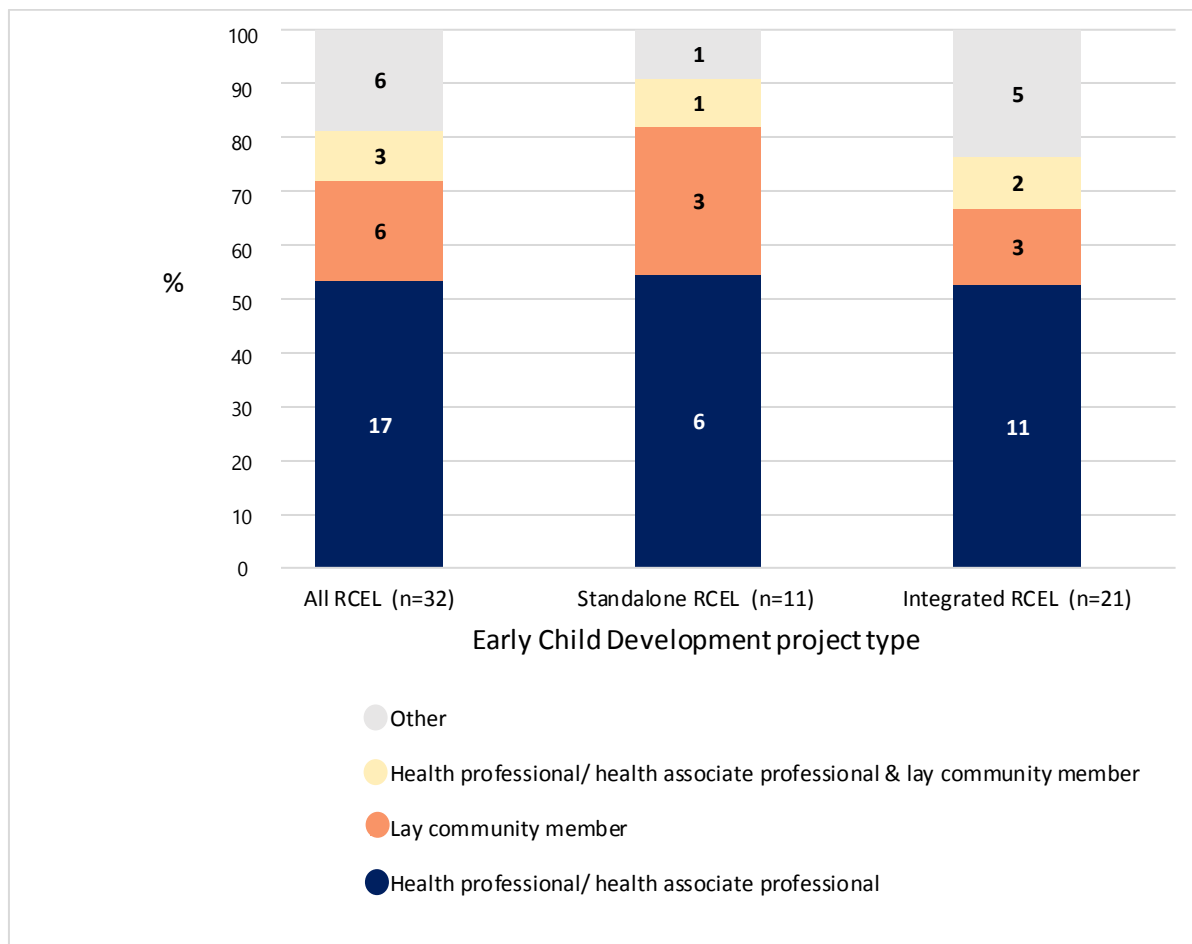

No missing data (N=32 projects). Figures on bars represent number of projects. 'Other'=teaching professionals, social work professionals, personal care workers and combinations of occupation types.

b) Reported level of education / qualification of frontline workers across all responsive care and early learning (RCEL) projects (N=32 projects)

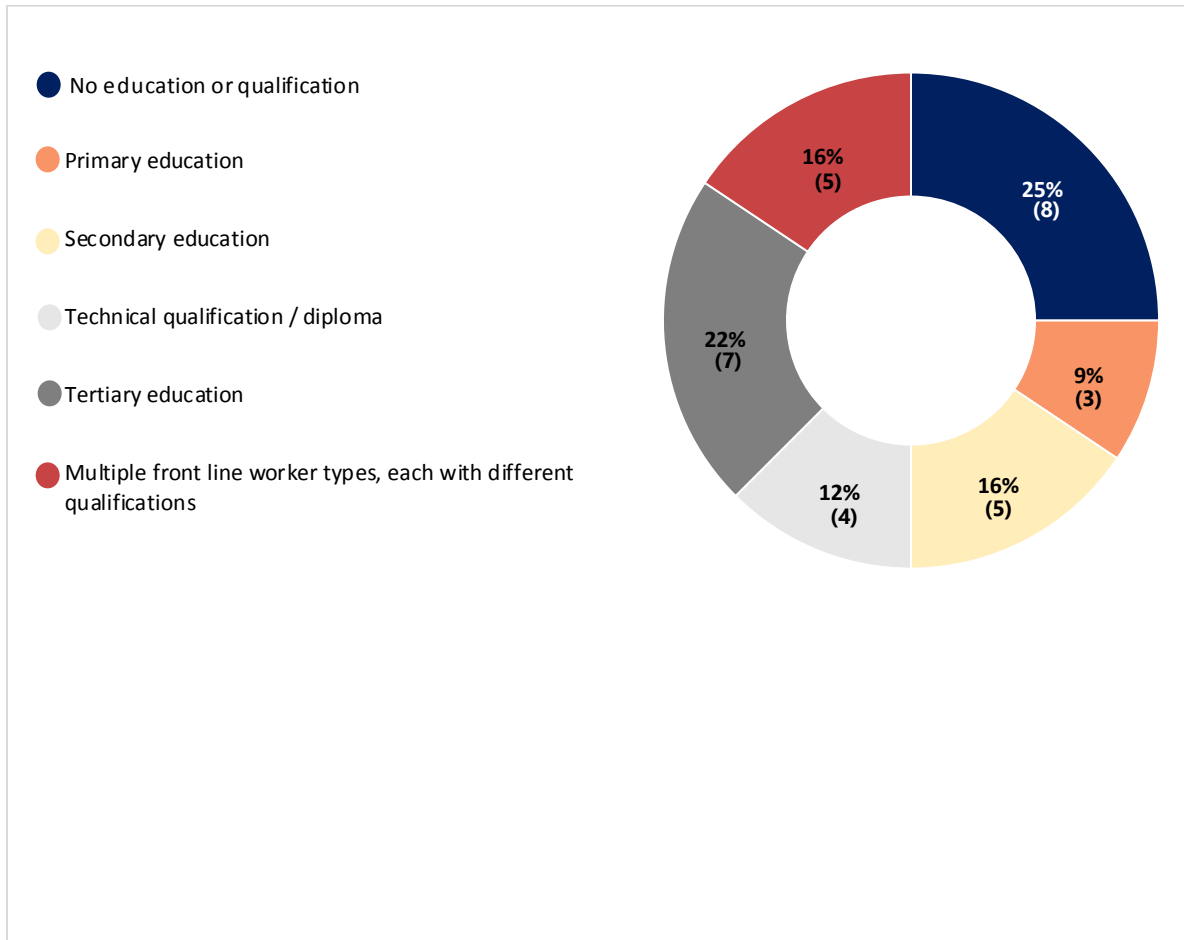

Data reported from Service Delivery Forms which reports on the level of education or qualifications that front-line workers had (rather than what implementers felt that they needed). No missing data.



c) Incentivisation of front-line workers delivering responsive care and early learning (RCEL) projects according to cadre of worker (N=25 projects)

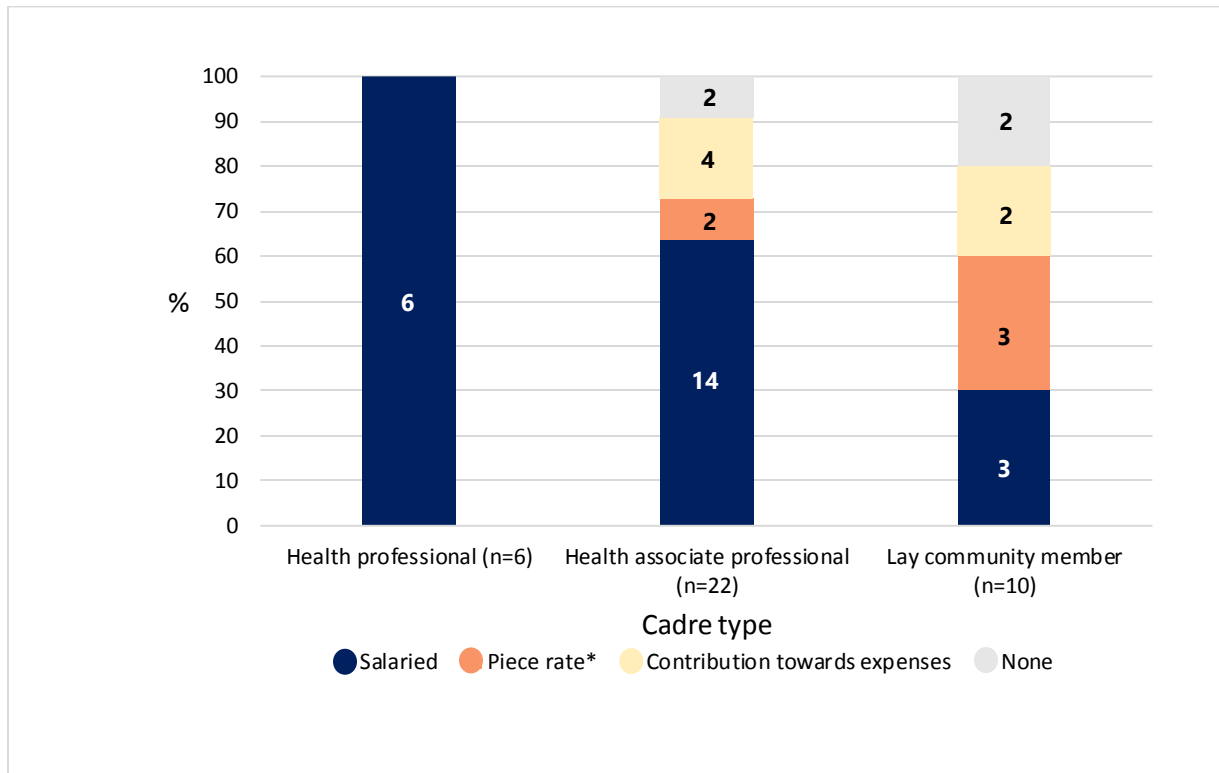

Total 'n' is greater than number of projects included (N=25) as several projects used more than one occupation as workers. Piece rate=any irregular payment where pay is per task rather than fixed salary payment. Figures on bars represent number of projects. Missing data from 7 projects.

d) Retention of worker amongst responsive care and early learning (RCEL) projects according to method of incentivisation (N=30 projects)

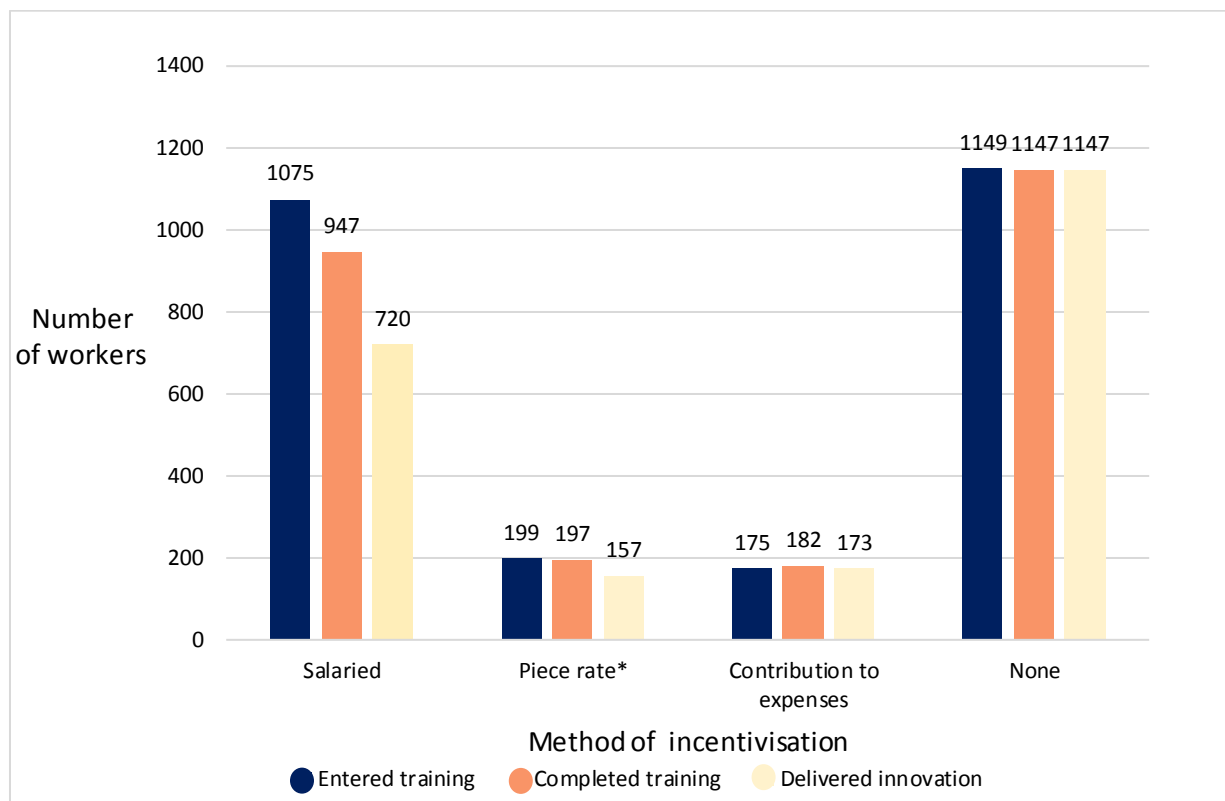

Data reported from the Results-based Management and Analysis Framework (Web Annex Table A) reported from each project. Missing data from 2 projects. Piece rate=any irregular payment where pay is per task rather than fixed salary payment

**Figure 3: Method and duration of delivery of intervention curricula amongst Saving Brains portfolio responsive care and early learning (RCEL) projects**

*a) Method of project delivery: group vs individual by type of RCEL intervention project (N=31 projects)*

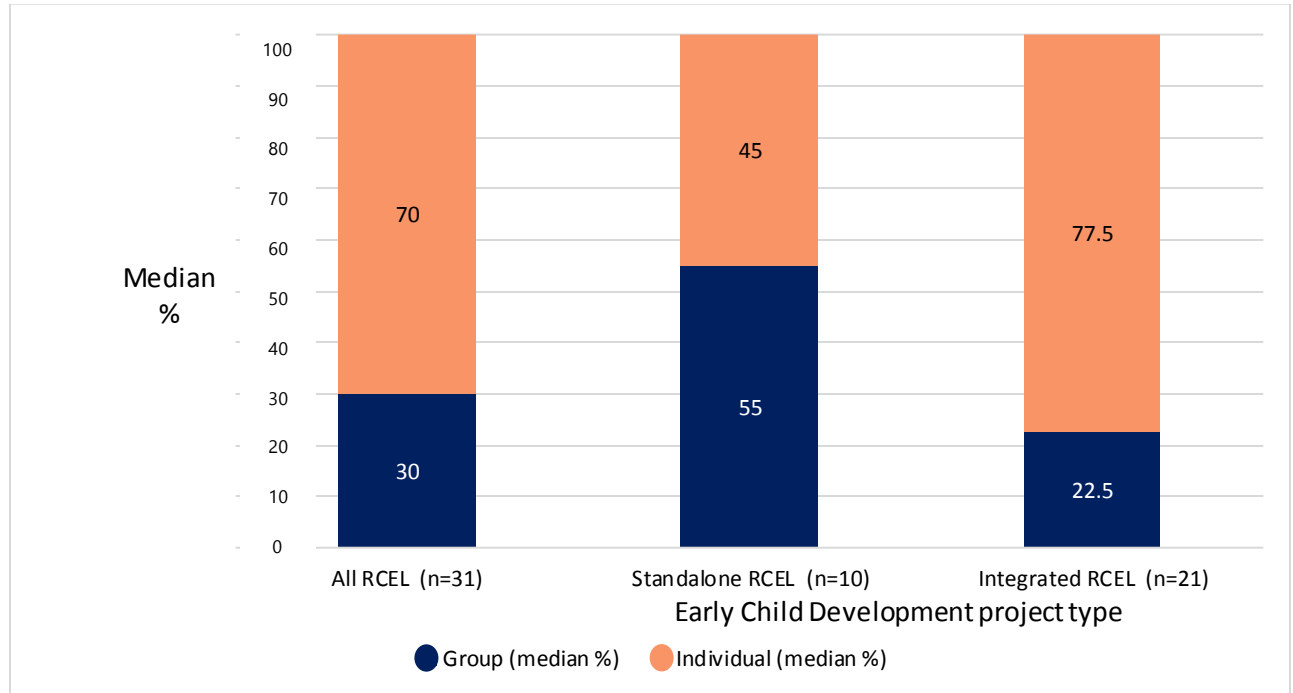

Missing data from 1 project.

b) Median duration of project sessions comparing projects delivering curricula in group vs individual sessions by type of RECL intervention project (N=26 projects)

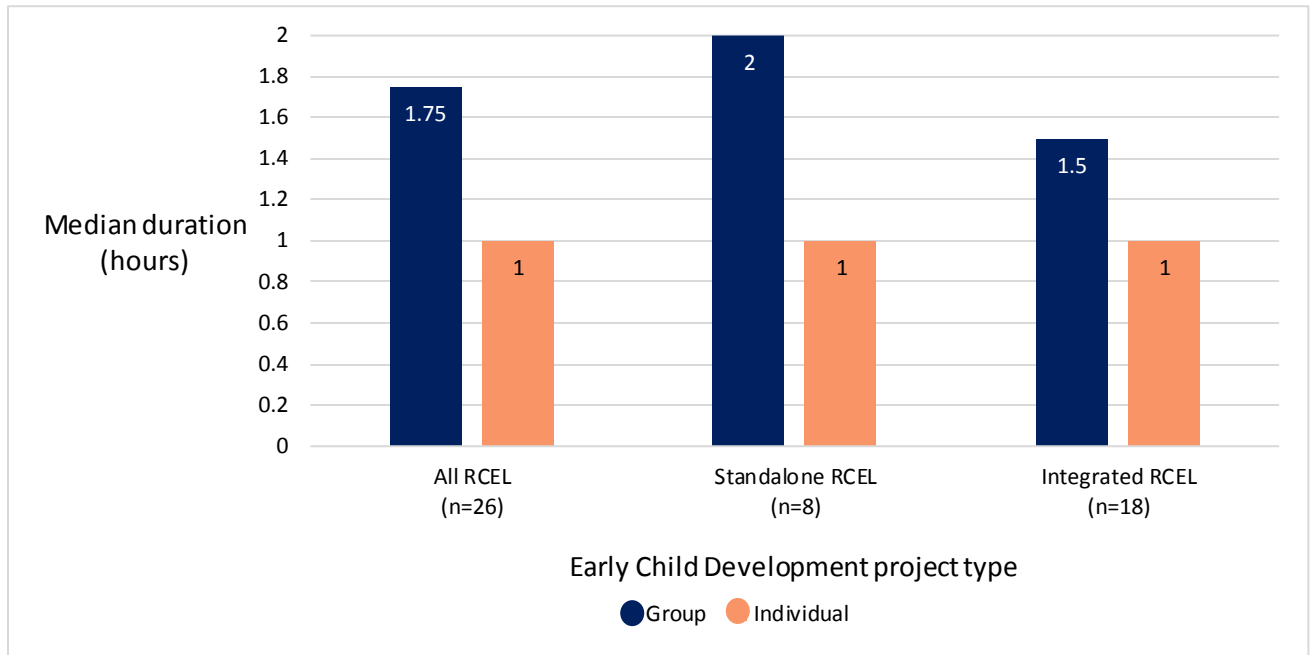

Missing data from 6

Review only

Web Appendix Figure A: Portfolio Conceptual Evaluation Framework

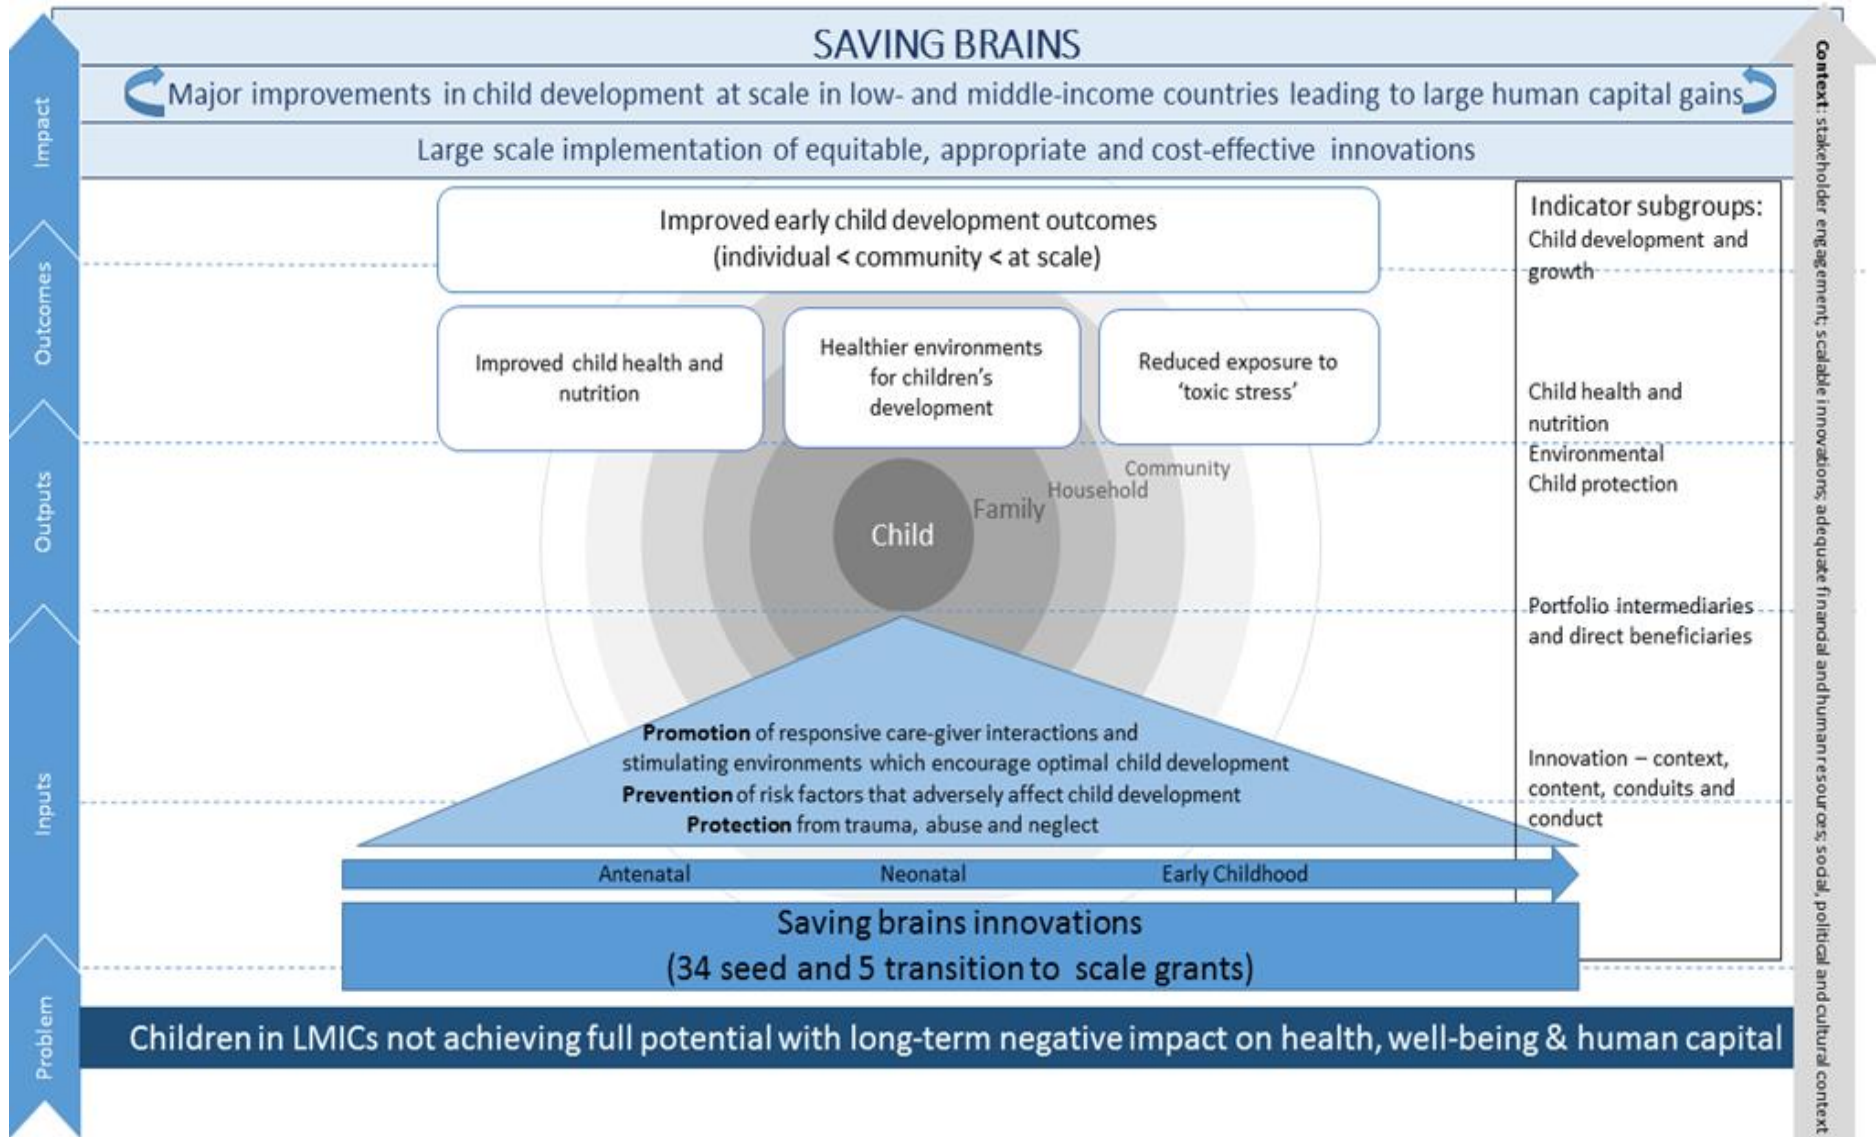

Web Appendix Figure B: Saving Brains portfolio level Theory of Change

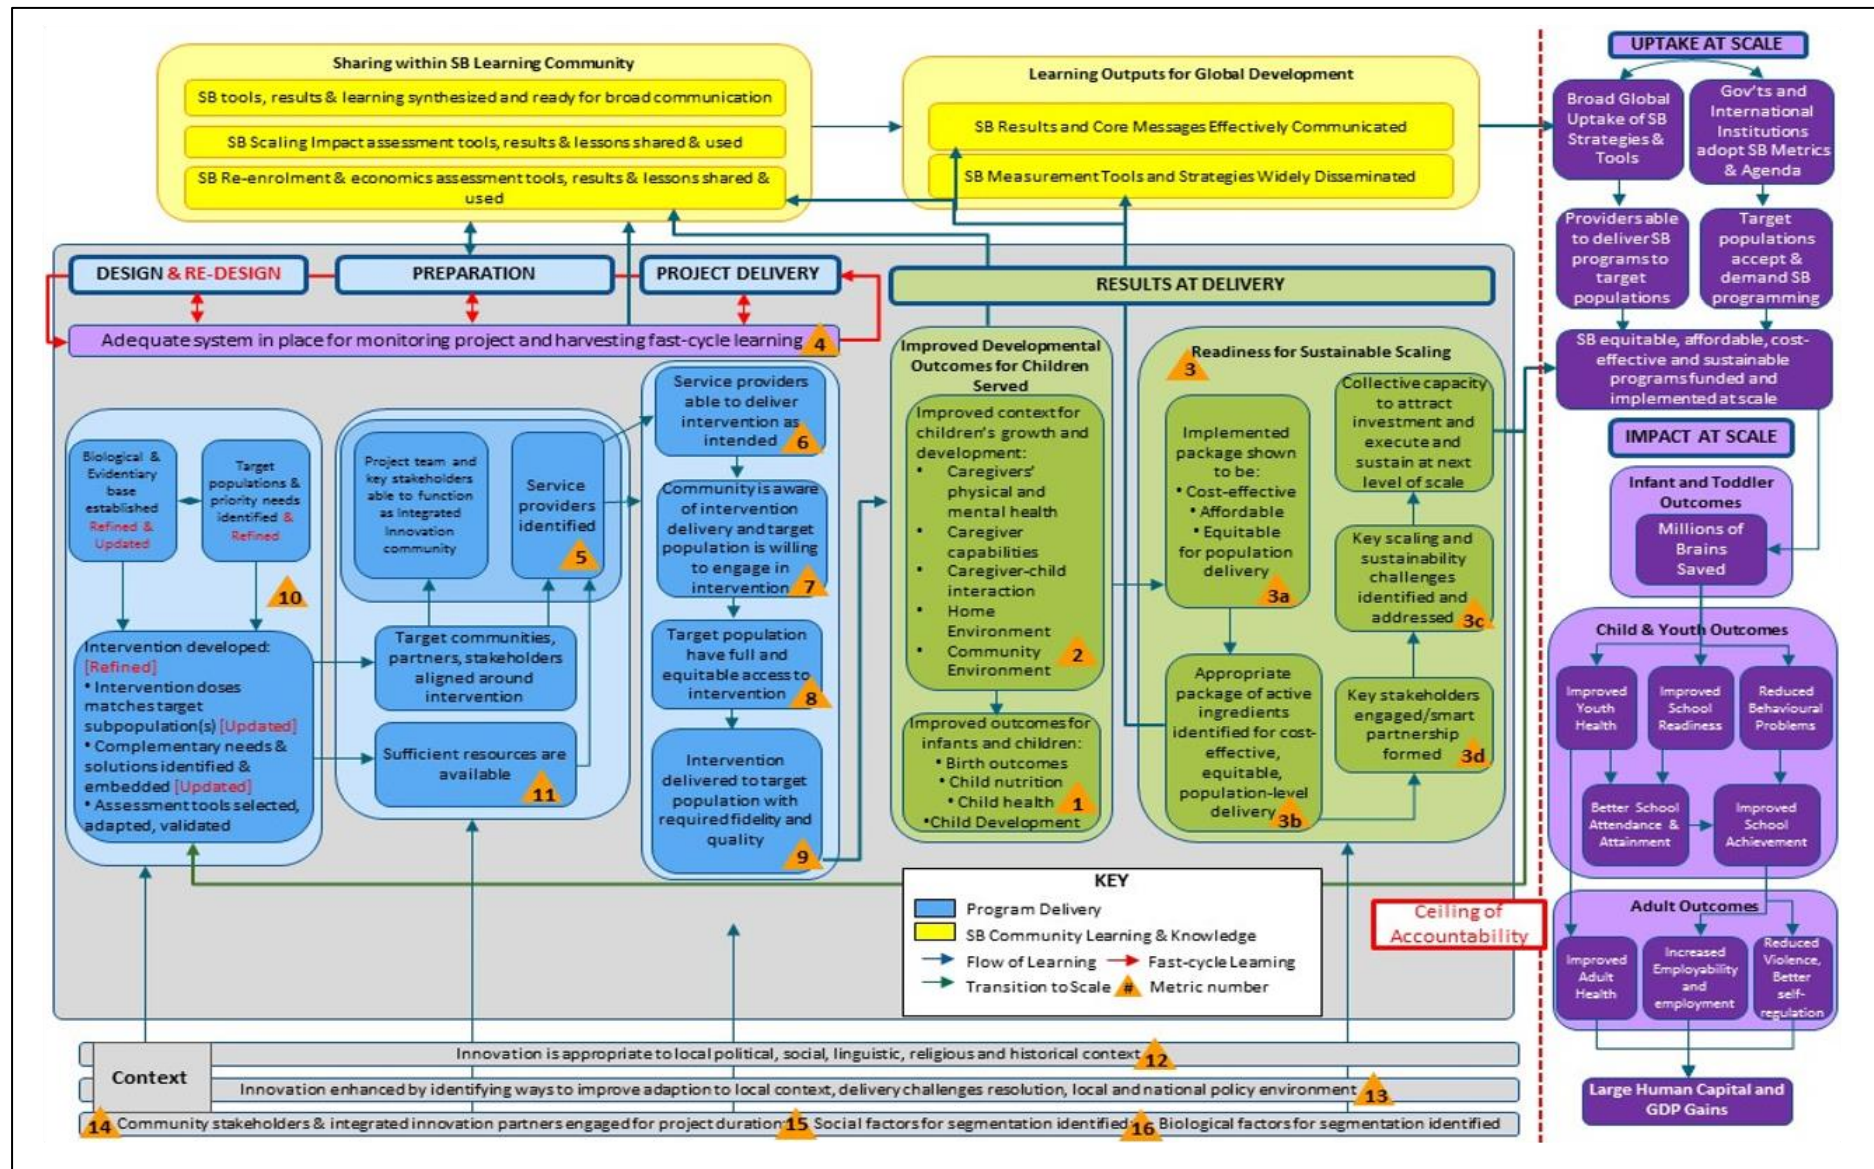

Web Appendix Table A: Data sources utilised for the Saving Brains portfolio evaluation

| <b>Data Source</b>                                                   | <b>Description</b>                                                                                                                                                  | <b>Timing of data collection</b>                                                           | <b>Organisation receiving data</b>                                       | <b>Data type</b>           |
|----------------------------------------------------------------------|---------------------------------------------------------------------------------------------------------------------------------------------------------------------|--------------------------------------------------------------------------------------------|--------------------------------------------------------------------------|----------------------------|
| <b>Service delivery forms</b>                                        | Document completed by grantees used to collect projected, interim and/or final and quantitative information on workforce and intervention delivery                  | Yearly                                                                                     | Grand Challenges Canada                                                  | Quantitative & Qualitative |
| <b>Results- based Management and Accountability Framework (RMAF)</b> | Framework completed by grantee which facilitates the collection of data and comparison of results around core metrics                                               | Six-monthly                                                                                | Grand Challenges Canada                                                  | Quantitative & Qualitative |
| <b>RMAF+</b>                                                         | Framework completed by grantee developed from the original RMAF and Theory of Change containing more detailed metrics on impact, process and context of innovations | Six-monthly                                                                                | Grand Challenges Canada                                                  | Quantitative & Qualitative |
| <b>Progress reports</b>                                              | Narrative reports completed by grantees detailing project progression, challenges, lessons learned, results, dissemination and next steps                           | Six-monthly                                                                                | Grand Challenges Canada                                                  | Qualitative                |
| <b>Research proposals</b>                                            | Proposal of innovation design completed by potential grantees                                                                                                       | Point of application for grant                                                             | Grand Challenges Canada                                                  | Qualitative                |
| <b>Saving Brains community meeting transcripts</b>                   | Transcripts from discussions between grantees and platform members at two Saving Brains community meetings                                                          | 21 <sup>st</sup> -22 <sup>nd</sup> Jun 2016<br>25 <sup>th</sup> -26 <sup>th</sup> Oct 2016 | London School of Hygiene & Tropical Medicine                             | Qualitative                |
| <b>Key informant interviews</b>                                      | Key informants identified through professional networks and approached for interview on relevant themes                                                             | Jun-Oct 2016                                                                               | World Health Organization & London School of Hygiene & Tropical Medicine | Qualitative                |
| <b>Grantee interviews</b>                                            | Grantees identified by LSHTM and platform members for thematic discussion                                                                                           | Jul-Sept 2016                                                                              | London School of Hygiene & Tropical Medicine                             | Qualitative                |
| <b>Focus group discussions</b>                                       | Grantees selected and invited to online focus group discussion on workforce choices, supervision and training, and monitoring quality and coverage                  | Jun-Oct 2016                                                                               | London School of Hygiene & Tropical Medicine                             | Qualitative                |

Web Appendix Table B: Interview and focus group topic guides from Saving Brains evaluation

| <b>Thematic questions for key informant interviews and focus groups (Toronto Saving Brains Community Meeting (June 21-22 2016) and webinars (August 17, 24 and September 2 2016)).</b> |                                                                                                                                                                                                                                                                                                                                                                                                                                                                                                                                                                                                                                                                                                                                                                                                                                                                                                                                                                                                                                                                                                                                                                                                                                                                                                                                 |
|----------------------------------------------------------------------------------------------------------------------------------------------------------------------------------------|---------------------------------------------------------------------------------------------------------------------------------------------------------------------------------------------------------------------------------------------------------------------------------------------------------------------------------------------------------------------------------------------------------------------------------------------------------------------------------------------------------------------------------------------------------------------------------------------------------------------------------------------------------------------------------------------------------------------------------------------------------------------------------------------------------------------------------------------------------------------------------------------------------------------------------------------------------------------------------------------------------------------------------------------------------------------------------------------------------------------------------------------------------------------------------------------------------------------------------------------------------------------------------------------------------------------------------|
| <b>Impact and outcome metrics question guide</b>                                                                                                                                       |                                                                                                                                                                                                                                                                                                                                                                                                                                                                                                                                                                                                                                                                                                                                                                                                                                                                                                                                                                                                                                                                                                                                                                                                                                                                                                                                 |
| <b>Background</b>                                                                                                                                                                      | Limitations of child development metrics pose a major challenge in policy and programming efforts to improve early child development outcomes in LMIC settings. Various initiatives are underway to improve measurement of outcomes at population and individual level (e.g. newly published data from McCoy DC et al, funded by the Saving Brains Programme, Grand Challenges Canada, providing the first global and regional estimates of the number of children failing to reach developmental milestones based on parent report measures. <sup>1</sup> However major challenges remain and collaboration is required to improve measurement of impact of interventions on child development outcomes at scale in low-resources settings.                                                                                                                                                                                                                                                                                                                                                                                                                                                                                                                                                                                    |
| <b>Objectives</b>                                                                                                                                                                      | To discuss as a group; <ol style="list-style-type: none"> <li>1. Different approaches to impact measurement that have been taken across the Saving Brains portfolio</li> <li>2. Challenges and benefits of different approaches taken</li> <li>3. Lessons learned for policy makers and programmers attempting to measure impact of ECD interventions at scale</li> </ol>                                                                                                                                                                                                                                                                                                                                                                                                                                                                                                                                                                                                                                                                                                                                                                                                                                                                                                                                                       |
| <b>Questions</b>                                                                                                                                                                       | <ol style="list-style-type: none"> <li>1. How has impact been measured across the Saving Brains portfolio?</li> <li>2. How were decisions reached about impact measures used? What factors influenced these decisions?</li> <li>3. How has use of these impact measures worked in practice?</li> <li>4. How about intermediary outcome measurement in terms of environment, caregiver relationships etc.?</li> <li>5. What have been the programming requirements to support this in terms of human resources, cost, timeline etc.?</li> <li>6. Have measures used required translation and adaptation in your local context and if so, how has this been managed?</li> <li>7. Do measures used include children less than 3 years and children with disabilities?</li> <li>8. Could measures used within the Saving Brains portfolio be used if innovations were scaled up at National level? If so, how and what would be required to support this? If not, what alternatives would you recommend for programmers and policy makers?</li> <li>9. Given the range of players involved, how can coordination within ECD networks be improved to support development of improved metrics?</li> <li>10. Any other aspects of impact measurement that you think are important considerations which we have not covered?</li> </ol> |
| <b>Cadre question guide</b>                                                                                                                                                            |                                                                                                                                                                                                                                                                                                                                                                                                                                                                                                                                                                                                                                                                                                                                                                                                                                                                                                                                                                                                                                                                                                                                                                                                                                                                                                                                 |
| <b>Background</b>                                                                                                                                                                      | Choices around human resources for implementation of ECD interventions have significant implications for effectiveness, sustainability and scale-up. Across the Savings Brains portfolio, a broad range of workers have been used to implement innovations with potential lessons for policy makers and programmers aiming to implement ECD interventions at scale in a range of contexts.                                                                                                                                                                                                                                                                                                                                                                                                                                                                                                                                                                                                                                                                                                                                                                                                                                                                                                                                      |
| <b>Objectives</b>                                                                                                                                                                      | <ol style="list-style-type: none"> <li>1. To discuss the range of workers used to implement innovations across settings.</li> <li>2. To discuss rationale for choice of workers used across settings.</li> <li>3. To discuss programming implications with use of different cadres of workers.</li> </ol>                                                                                                                                                                                                                                                                                                                                                                                                                                                                                                                                                                                                                                                                                                                                                                                                                                                                                                                                                                                                                       |
| <b>Questions</b>                                                                                                                                                                       | <ol style="list-style-type: none"> <li>1. What was the rationale for selection of worker type across different SB innovations?</li> </ol>                                                                                                                                                                                                                                                                                                                                                                                                                                                                                                                                                                                                                                                                                                                                                                                                                                                                                                                                                                                                                                                                                                                                                                                       |



**Thematic questions for key informant interviews and focus groups (Toronto Saving Brains Community Meeting (June 21-22 2016) and webinars (August 17, 24 and September 2 2016)).**

2. What challenges and benefits were noted with use of various cadres of workers across settings?
3. Where pre-existing categories of workers were used, what were the pros and cons experienced? How was the overall workload for individual workers managed when implementing 'additional' ECD intervention?
4. Where new worker groups were used, what were the pros and cons of this approach? How were issues of financing, governance and sustainability managed?
5. How were decisions around incentivisation reached?
6. Where community health workers were used, how were decisions reached around type of community health worker, level of training, supervision, equipment and incentivisation?
7. Where community health workers were used with the goal of improving equity and coverage of interventions, were these tracked? And if so, provisional recommendations or findings?
8. When thinking about decisions at a national scale, are there additional factors that need to be considered about human resources for implementation of ECD interventions?

**Content (positive stimulation interventions) question guide**

**Background**

Available evidence provides general guidance to policy makers and programmers about elements of positive stimulation interventions associated with increased effectiveness.<sup>2</sup> In particular, use of a structured evidence based curriculum, provision of opportunity to practice skills with the child, provision of feedback to the parent, adequate training and supervision for staff, integrated health, nutrition and ECD elements and both community and government support are thought to be important in intervention effectiveness.<sup>2</sup> There are also an increasing range of resources available to programmers implementing ECD interventions.<sup>3, 4</sup> However, from a practical perspective programmers still face detailed choices about intervention design and pros and cons of alternate choices in different settings may not be clear.

**Objectives**

1. To consider key intervention design questions raised when implementing positive stimulation interventions across the SB portfolio.
2. To consider how choices were made around these intervention design elements.
3. To consider relevance of lessons learned to programmers developing models for ECD interventions at national scale.

**Questions**

1. Across the SB portfolio what factors have informed choices about the following elements of positive stimulation interventions;
  2. Target of intervention (e.g. parent, parent and child, child only)
  3. Age of children
  4. Number of contacts
  5. Frequency of contacts
  6. Duration of contacts
  7. Chosen curriculum (with as much detail re actual curriculum as possible)
  8. With regards to choices made, what has worked well and why?
  9. Are there areas which have not worked well and if so, please describe?
  10. Are there design elements that need to change to enable scale up and if so, please provide examples?
  11. Any other elements that you consider important for programmers at national level to consider when developing models for implementation at scale?

NB *That questions re universal vs targeted and integration of interventions are asked elsewhere but could also be covered here.*

**Delivery setting question guide**

**Background**

**Thematic questions for key informant interviews and focus groups (Toronto Saving Brains Community Meeting (June 21-22 2016) and webinars (August 17, 24 and September 2 2016)).**

ECD interventions are delivered in diverse settings in terms of geography, rural/urban, different sectors, facility/communities or home or often a mix of settings.

Decisions about setting have implications for policy and on many aspects of programming.

**Objectives**

To discuss as a group;

1. How decisions about implementation setting were made across the portfolio
2. Implications of those decisions, both positive and negative on program implementation and scale-up
3. Lessons learned for policy makers and programmers designing ECD programmes at national

**Questions**

1. How were decisions about the setting for implementation of your ECD programme reached (e.g. convenience, targeting of vulnerable subgroup, prior involvement with that sector etc.)?
2. What information did you use in deciding about the setting of implementation for your program?
3. Was there any information that if you'd had it earlier, would have altered your decision about setting?
4. Benefits specific to your setting?
5. Challenges specific to your setting?
6. What implications has setting choice had on the ease of program implementation?
7. What recommendations about delivery setting would you make to policy makers and programmers designing ECD programmes at national scale?
8. Anything further that you would like to highlight about implementation setting that we have not covered so far?

**Universal and targeted approaches**

**Background**

Universal approaches to improving ECD aim to increase protective factors and reduced risks for adverse child development at a whole population level. Targeted approaches are aimed specifically at children identified as having a higher-than-population-baseline risk of adverse developmental outcomes.

While systems which provide both universal and targeted ECD interventions are ideal, in resource limited settings, some have suggested that services should initially be targeted to the most vulnerable.<sup>5</sup> Further, from a rights perspective, it can be argued that ensuring equity through inclusion of children with specific additional risk factors (e.g. disability, membership to ethnic minority subgroups etc.) is a priority, regardless of setting.

There are however many challenges. While effectiveness of interventions may be greatest for certain vulnerable population sub-groups, with potentially favourable 'benefit to cost ratio' for investment, scaling up services to include those 'hardest to reach' may involve higher initial costs.<sup>2</sup> These complexities pose challenges for policy makers trying to develop ECD programmes which are equitable but also provide sustainable coverage at scale.

**Objectives**

To discuss as a group;

1. The rationale for selection of targeted versus universal approaches to ECD implementation in different settings within the SB portfolio.
2. Programming implications for both approaches
3. Requirements to inform policy makers in decisions about either universal or targeted approach to implementation

**Questions**

1. What was the rationale for selection of targeted versus universal approaches to ECD implementation in your context?
2. In interventions where a targeted approach was taken, how was the target population

**Thematic questions for key informant interviews and focus groups (Toronto Saving Brains Community Meeting (June 21-22 2016) and webinars (August 17, 24 and September 2 2016)).**

identified (e.g. data driven, empirically, opportunistically)?

3. What are the benefits and disadvantages of a targeted approach in different settings?
4. What are the benefits and disadvantages of a universal approach in different settings?
5. What have been the programming implications of different approaches taken (e.g. human resources, training and supervision, financial)?
6. Have there been implications for financial sustainability and if so, moving forward, what strategies might be used to address these?
7. For interventions taking a universal approach, what strategies have been implemented to ensure inclusion of disadvantaged population subgroups including children with disabilities?
8. What recommendations about intervention targeting would you make to policy makers and programmers designing ECD programmes at national scale?
9. Anything further that you would like to highlight about implementation setting that we have not covered so far?

**Processes for monitoring coverage and quality at scale**

**Background**

Processes to ensure quality and coverage are important for effective and equitable implementation of ECD interventions.<sup>2</sup> However, review by Yousafzai et al has highlighted the need for further consideration of implementation processes to facilitate more comprehensive guidance as to how to effectively implement interventions.<sup>6, 7</sup> The SB portfolio provides a unique opportunity to consider implementation processes in order to provide more detailed guidance for programming at scale.

**Objectives**

To discuss:

1. Priorities in measuring quality and coverage of intervention.
2. Approaches used to monitor quality and coverage across the portfolio.
3. Considerations for monitoring coverage and quality of ECD interventions at scale.

**Questions**

1. What do you think are the 3 most important elements of 'quality' of implementation to measure?
2. What indicators have been most helpful in measuring these?
3. What processes of supervision and training have been developed to support this? (As much detail as possible re number of supervisors per worker, frequency, duration and mode of supervision)
4. What has been required to support monitoring of quality and coverage in terms of;
5. Data sources - are these procedures integrated into existing national data collection systems or stand-alone systems?
6. Technical and funding support?
7. Incentivisation of workers?
8. How have findings from monitoring been incorporated into ongoing implementation?
9. Would these approaches to monitoring of quality be feasible and appropriate for interventions delivered at national scale?
10. What strategies have been used to ensure equitable coverage of interventions?
11. What strategies have been used to reach the most difficult to reach populations including children with disabilities?
12. What challenges have been faced with regard to retention of participants? How have these challenges been overcome?
13. How would these approaches need modified for implementation at national scale?

**Integration**

**Background**

Integrated delivery of ECD with interventions in other sectors is often recommended to promote holistic care of children and their families, to maximise synergies of interventions and for efficiency.

**Thematic questions for key informant interviews and focus groups (Toronto Saving Brains Community Meeting (June 21-22 2016) and webinars (August 17, 24 and September 2 2016).**

However, an integrated approach to service delivery also has many implications for programming.

**Objectives**

To consider as a group;

1. Experience with integrated innovations across the SB portfolio in terms.

**Questions**

1. What has been the rationale for choosing ECD specific or integrated ECD approaches in different settings across the portfolio?
2. Where integrated approaches have been taken, how has this worked?
3. What have been the programmatic implications of an integrated approach in terms of;
4. Work-load for workers?
5. Training and supervision?
6. Equipment?
7. Cost?
8. Monitoring and evaluation?
9. How has governance across sectors been managed?
10. What are the implications of an integrated approach for implementation at national scale?
11. Are there other elements of an integrated approach which are important to consider in implementation of ECD programmes at national scale?

**Questions for experts in the field**

1. What do you consider to be priority needs for policy makers and programmers in implementing ECD programming at national scale, once a decision has been made to invest in early child development?
2. With regards to ECD programmes at scale, what do you consider to be the key design decisions for policy makers and programmers?
3. Given the challenges of measuring impact in ECD programmes and the constraints that this poses to progress in policy and planning, what do you see as next steps in improving developmental outcome metrics within programmes and at national scale?
4. If it were possible to monitor 3 indicators on the pathway to improving ECD at a national level, what would you measure and why?
5. What key lessons can be learned about cadres of worker for delivery of ECD interventions from other global child health interventions? In particular, what lessons around use of CHWs are relevant for CHW delivery of positive stimulation interventions in home settings?

1  
2  
3  
4  
5  
6  
7  
8  
9  
10  
11  
12  
13  
14  
15  
16  
17  
18  
19  
20  
21  
22  
23  
24  
25  
26  
27  
28  
29  
30  
31  
32  
33  
34  
35  
36  
37  
38  
39  
40  
41  
42  
43  
44  
45  
46  
47  
48  
49  
50  
51  
52  
53  
54  
55  
56  
57  
58  
59  
60

For peer review only

Web Appendix Table C: Key informants contributing to qualitative components of portfolio evaluation

|                                                                                                                                                                                                                                                   | Organisation Type/Name                                       | Position                        | Question theme                                                                       |
|---------------------------------------------------------------------------------------------------------------------------------------------------------------------------------------------------------------------------------------------------|--------------------------------------------------------------|---------------------------------|--------------------------------------------------------------------------------------|
| <b>ECD POLICY AND PROGRAMMING</b>                                                                                                                                                                                                                 |                                                              |                                 |                                                                                      |
| 1                                                                                                                                                                                                                                                 | Saving Brains                                                | Executive                       | ECD research, policy and programming; contemporary challenges and future directions. |
| 2.                                                                                                                                                                                                                                                | Multilateral UN organisation                                 | Policy and programming.         | ECD research, policy and programming; contemporary challenges and future directions. |
| 3.                                                                                                                                                                                                                                                | Multilateral UN organisation                                 | Policy and programming.         | ECD research, policy and programming; contemporary challenges and future directions. |
| 4.                                                                                                                                                                                                                                                | Private international ECD foundation                         | Policy maker.                   | ECD research, policy and programming; contemporary challenges and future directions. |
| 5.                                                                                                                                                                                                                                                | International Financial Institution.                         | Policy maker.                   | ECD research, policy and programming; contemporary challenges and future directions. |
| 6.                                                                                                                                                                                                                                                | Multilateral non-government organisation.                    | Policy & programming.           | ECD programming, iNGO perspective on what is needed to progress the field            |
| 7.                                                                                                                                                                                                                                                | International Child Health Research Institution              | Policy, programming & research. | ECD in global child health – challenges and future directions.                       |
| 8.                                                                                                                                                                                                                                                | Non-government disability-ECD organisation - national level. | Policy and programming.         | Inclusion in ECD programming – iNGO perspective                                      |
| 9.                                                                                                                                                                                                                                                | Ministry of Health, sub-Saharan African country.             | Policy and Programming          | ECD in global child health, health perspectives.                                     |
| <b>OTHER EXPERTS IN FIELD</b>                                                                                                                                                                                                                     |                                                              |                                 |                                                                                      |
| <b>General</b>                                                                                                                                                                                                                                    |                                                              |                                 |                                                                                      |
| 10.                                                                                                                                                                                                                                               | Public health academic institution, UK                       | Senior Researcher               | Research priorities in ECD                                                           |
| 11.                                                                                                                                                                                                                                               | Public health academic institution, USA.                     | Senior Researcher.              | Challenges, priorities and approaches in future ECD research.                        |
| <b>Specific technical</b>                                                                                                                                                                                                                         |                                                              |                                 |                                                                                      |
| 12.                                                                                                                                                                                                                                               | Public health academic institution, USA.                     | Senior Researcher.              | Impact metrics                                                                       |
| 13.                                                                                                                                                                                                                                               | Public health academic institution, USA.                     | Researcher.                     | Impact metrics                                                                       |
| 14.                                                                                                                                                                                                                                               | Public health academic institution, UK                       | Senior Researcher.              | Impact metrics                                                                       |
| 15.                                                                                                                                                                                                                                               | Multilateral UN organisation.                                | Senior Researcher.              | Impact metrics                                                                       |
| 16.                                                                                                                                                                                                                                               | Saving Brains Grant Recipient Research Institution.          | Senior Researcher.              | Implementation process metrics, human resourcing.                                    |
| 17.                                                                                                                                                                                                                                               | Saving Brains Grant Recipient Research Institution.          | Senior Researcher.              | Implementation process metrics, cost-effectiveness                                   |
| 18.                                                                                                                                                                                                                                               | Saving Brains Grant Recipient Research Institution.          | Senior Researcher.              | Integration.                                                                         |
| 19.                                                                                                                                                                                                                                               | Academic Centre, USA.                                        | Senior Researcher.              | Implementation process knowledge gaps, priority questions and research methodology.  |
| <b>Saving Brains Platform</b>                                                                                                                                                                                                                     |                                                              |                                 |                                                                                      |
| Members of the Saving Brains Platform team who were consulted about various aspects of the evaluation, their experiences working within the Saving Brains portfolio and in regard to specific technical, programming and research related themes. |                                                              |                                 |                                                                                      |
| <b>Grantees</b>                                                                                                                                                                                                                                   |                                                              |                                 |                                                                                      |
| Twenty-one of thirty-nine (54%) of research teams were specifically interviewed regarding their innovation and various aspects of their experiences within the Saving Brains portfolio.                                                           |                                                              |                                 |                                                                                      |

Web Appendix Table D: Saving Brains responsive care and early learning (RCEL) Transition-to-Scale projects: Summary of challenges and course correction

| Project Name                                             | Transition to scale of an integrated program of nutritional care and psychosocial stimulation to improve malnourished children's development                                                                              | An integrated intervention targeted at deprived pre-school children in rural areas                                                                                                                                                                      | Home visiting programs to improve early child development and maternal mental health                                                                                                                                                       | Saving Brains, Changing Mindsets                                                                                                                                                                                                                                                |
|----------------------------------------------------------|---------------------------------------------------------------------------------------------------------------------------------------------------------------------------------------------------------------------------|---------------------------------------------------------------------------------------------------------------------------------------------------------------------------------------------------------------------------------------------------------|--------------------------------------------------------------------------------------------------------------------------------------------------------------------------------------------------------------------------------------------|---------------------------------------------------------------------------------------------------------------------------------------------------------------------------------------------------------------------------------------------------------------------------------|
| <b>HUMAN RESOURCES: CHALLENGES AND COURSE CORRECTION</b> |                                                                                                                                                                                                                           |                                                                                                                                                                                                                                                         |                                                                                                                                                                                                                                            |                                                                                                                                                                                                                                                                                 |
| <i>Interaction with existing services</i>                | Integration and coordination with health services in rural Bangladesh.                                                                                                                                                    | Competition from a new government-run parenting program, ICBF.                                                                                                                                                                                          | Integration into existing family health strategy home-visits increased visit frequency but reduced number of families visited. Local workers demanded financial incentives to deliver new project and prioritized pre-existing activities. | Issues encountered were gaining confidence and trust of construction companies, quality assurance of individual NGOs, securing adequate infrastructure, particularly as a decline in the construction industry slowed project progress                                          |
| <i>Adaptation for implementation</i>                     | -                                                                                                                                                                                                                         | Shift required from didactic learning to 'demonstration and practice' method of learning. Supervision forms were adapted to type of data collected.                                                                                                     | Busy schedule of CHWs meant missed appointments were not rescheduled. CDAs more frequently rescheduled visits. Supervision was jeopardised by existing heavy workloads and required intervention by project coordinator.                   | During scale-up, the focus remained on strengthening supervision quality of partner NGOs.                                                                                                                                                                                       |
| <i>Training time commitment</i>                          | Training schedule difficulty for government clinic workers was mitigated by split of training schedules to maintain clinic duty cover.                                                                                    | Long training time commitment was mitigated by incentivisation.                                                                                                                                                                                         | -                                                                                                                                                                                                                                          | -                                                                                                                                                                                                                                                                               |
| <i>Staff recruitment / remuneration / retention</i>      | Salaried government workers expected incentivisation for additional work and some refused to conduct sessions; this was mitigated by motivational meetings and supervision.                                               | Attrition of workers was mitigated through fast-track training programme. Workers in one affluent town did not value RCEL project, and tasks were unfamiliar to these workers (<3% of sample).                                                          | Difficulty in identifying CHWs to deliver intervention in addition to existing routine. High turnover of CHWs considering intervention too time consuming.                                                                                 | Difficulties in identifying sufficiently qualified workers, but not overqualified and viewed RCEL as 'beneath their station'. Initial high attrition rates as workers apprehensive about working with children <3 yrs. Changes made to training modules and selection criteria. |
| <i>Supervision</i>                                       | -                                                                                                                                                                                                                         | Reticence from providers unfamiliar with close coaching was mitigated by promoting positive tutoring relationships. Implications and impacts from rurality of workers on supervision.                                                                   | Supervision not considered a priority by supervisor priority requiring project coordinator to intervene, holding meetings with CDAs and performing supervised visits.                                                                      | -                                                                                                                                                                                                                                                                               |
| <b>CONTENT: CHALLENGES AND COURSE CORRECTION</b>         |                                                                                                                                                                                                                           |                                                                                                                                                                                                                                                         |                                                                                                                                                                                                                                            |                                                                                                                                                                                                                                                                                 |
| <i>Adaptation for implementation</i>                     | Minor adaptations to Reach-up for the pair study and major adaptation for the group study. Adapted for use in community clinics instead of homes and to be used for fortnightly visits instead of weekly in both studies. | Simplification of curricula language to facilitate provider use. Reluctance to lend toys/materials led to introduction of toy library. Wide developmental age range in groups led to adaptation with more baby-friendly routines and sub-groups by age. | Reach-Up was adapted for twice monthly visits instead of the original weekly visit. Mothers did not like the toy's original appearance which they considered poor. Toy was redesigned to be more appealing.                                | During scale-up in other regions of India e.g. Bangalore, training module was contextualized, and nutrition menu adapted to the local context.                                                                                                                                  |
| <i>Materials</i>                                         | Complaints regarding quality of toys (parents) led to extended provider training to facilitate more 'fun' interactive                                                                                                     | Initial reluctance for recyclable toy materials but toy-making workshops changed perceptions. Toy library                                                                                                                                               | Materials required cultural adaptation. Adaptation guide needed to be clear regarding exactly what could be adapted                                                                                                                        | Materials were translated for regions requiring the desired learning materials.                                                                                                                                                                                                 |

1  
2  
3  
4  
5  
6  
7  
8  
9  
10  
11  
12  
13  
14  
15  
16  
17  
18  
19  
20  
21  
22  
23  
24  
25  
26  
27  
28  
29  
30  
31  
32  
33  
34  
35  
36  
37  
38  
39  
40  
41  
42  
43  
44  
45  
46  
47  
48  
49  
50  
51  
52  
53  
54  
55  
56  
57  
58  
59  
60

|                                                              |                                                                                                                                                                                                                                                                                 |                                                                                                                                                                                                                                                                                                   |                                                                                                                                                                                                      |          |
|--------------------------------------------------------------|---------------------------------------------------------------------------------------------------------------------------------------------------------------------------------------------------------------------------------------------------------------------------------|---------------------------------------------------------------------------------------------------------------------------------------------------------------------------------------------------------------------------------------------------------------------------------------------------|------------------------------------------------------------------------------------------------------------------------------------------------------------------------------------------------------|----------|
|                                                              | sessions and directions for making new toys.                                                                                                                                                                                                                                    | developed to promote unrestricted use which was appreciated by caregivers.                                                                                                                                                                                                                        | and what concepts had to be maintained to guarantee fidelity.                                                                                                                                        |          |
| <i>Recipient attendance, retention &amp; incentivisation</i> | Attendance challenges included distance to clinic, late start to sessions, and expectation of nutritional supplement. More timely attendance and stricter time-keeping encouraged. Incentivisation included oil supplementation distribution & caregiver motivational meetings. | High value of project nutritional package incentivised attendance. Tutors and providers supported problem-solving to overcome barriers to attendance (i.e. long distances, travel costs, job responsibilities etc.). Encouraging positive social interactions meant beneficiaries more motivated. | Beneficiaries had no other incentives but the program itself. The major cause of attrition was mobile populations due to rental accommodation. Mothers enjoyed and wanted to complete the programme. | -        |
| <b>References</b>                                            | (21-23)                                                                                                                                                                                                                                                                         | (23, 24)                                                                                                                                                                                                                                                                                          | (23, 25)                                                                                                                                                                                             | (23, 26) |

For peer review only



# BMJ Open

## Human resources and curricula content for early child development implementation: multi-country mixed-methods evaluation

|                                 |                                                                                                                                                                                                                                                                                                                                                                                                                                                                                                                                                                                                                                                                                                                                                                                                                                                                                                                                                                                                                                                                                                                                                                                                                                                                                                                                                                                                                                                                                                                                                                                                                                                                                                                                                                                                                                                                                            |
|---------------------------------|--------------------------------------------------------------------------------------------------------------------------------------------------------------------------------------------------------------------------------------------------------------------------------------------------------------------------------------------------------------------------------------------------------------------------------------------------------------------------------------------------------------------------------------------------------------------------------------------------------------------------------------------------------------------------------------------------------------------------------------------------------------------------------------------------------------------------------------------------------------------------------------------------------------------------------------------------------------------------------------------------------------------------------------------------------------------------------------------------------------------------------------------------------------------------------------------------------------------------------------------------------------------------------------------------------------------------------------------------------------------------------------------------------------------------------------------------------------------------------------------------------------------------------------------------------------------------------------------------------------------------------------------------------------------------------------------------------------------------------------------------------------------------------------------------------------------------------------------------------------------------------------------|
| Journal:                        | <i>BMJ Open</i>                                                                                                                                                                                                                                                                                                                                                                                                                                                                                                                                                                                                                                                                                                                                                                                                                                                                                                                                                                                                                                                                                                                                                                                                                                                                                                                                                                                                                                                                                                                                                                                                                                                                                                                                                                                                                                                                            |
| Manuscript ID                   | bmjopen-2019-032134.R1                                                                                                                                                                                                                                                                                                                                                                                                                                                                                                                                                                                                                                                                                                                                                                                                                                                                                                                                                                                                                                                                                                                                                                                                                                                                                                                                                                                                                                                                                                                                                                                                                                                                                                                                                                                                                                                                     |
| Article Type:                   | Research                                                                                                                                                                                                                                                                                                                                                                                                                                                                                                                                                                                                                                                                                                                                                                                                                                                                                                                                                                                                                                                                                                                                                                                                                                                                                                                                                                                                                                                                                                                                                                                                                                                                                                                                                                                                                                                                                   |
| Date Submitted by the Author:   | 26-Nov-2019                                                                                                                                                                                                                                                                                                                                                                                                                                                                                                                                                                                                                                                                                                                                                                                                                                                                                                                                                                                                                                                                                                                                                                                                                                                                                                                                                                                                                                                                                                                                                                                                                                                                                                                                                                                                                                                                                |
| Complete List of Authors:       | <p>Kohli-Lynch, Maya; London School of Hygiene and Tropical Medicine, Maternal, Adolescent, Reproductive and Child Health Centre; University of Bristol, School of Social and Community Medicine</p> <p>Ponce Hardy, Victoria; London School of Hygiene and Tropical Medicine, Maternal, Adolescent, Reproductive and Child Health Centre</p> <p>Bernal Salazar, Raquel; Universidad de Los Andes, Economics Department; Universidad de los Andes, Centro de Estudios de Desarrollo Economico (CEDE)</p> <p>Bhopal, Sunil; London School of Hygiene and Tropical Medicine, Maternal &amp; Child Health Intervention Research Group; Northern School of Paediatrics</p> <p>Brentani, Alexandra; Universidade de Sao Paulo, Departamento de Pediatria, Faculdade de Medicina</p> <p>Cavallera, Vanessa; World Health Organization, Department of Mental Health and Substance Abuse</p> <p>Goh, Esther; Bernard Van Leer Foundation</p> <p>Hamadani, Jena; icddr, Maternal and Child Health Division</p> <p>Hughes, Rob; London School of Hygiene and Tropical Medicine, Maternal &amp; Child Health Intervention Research Group</p> <p>Manji, Karim; Muhimbili University of Health and Allied Sciences, Department of Paediatrics and Child Health; Pediatrics</p> <p>Milner, Kate; London School of Hygiene and Tropical Medicine, Maternal, Adolescent, Reproductive and Child Health Centre; Murdoch Childrens Research Institute</p> <p>Radner, James; University of Toronto, Munk School of Global Affairs &amp; Public Policy; Harvard University, Center on the Developing Child</p> <p>Sharma, Sonia; Mobile Crèches, Sector IV</p> <p>Silver, Karlee; Grand Challenges Canada</p> <p>Lawn, Joy; London School of Hygiene and Tropical Medicine, Maternal, Adolescent, Reproductive and Child Health Centre</p> <p>Tann, Cally; London School of Hygiene and Tropical Medicine,</p> |
| <b>Primary Subject Heading</b>: | Public health                                                                                                                                                                                                                                                                                                                                                                                                                                                                                                                                                                                                                                                                                                                                                                                                                                                                                                                                                                                                                                                                                                                                                                                                                                                                                                                                                                                                                                                                                                                                                                                                                                                                                                                                                                                                                                                                              |
| Secondary Subject Heading:      | Paediatrics                                                                                                                                                                                                                                                                                                                                                                                                                                                                                                                                                                                                                                                                                                                                                                                                                                                                                                                                                                                                                                                                                                                                                                                                                                                                                                                                                                                                                                                                                                                                                                                                                                                                                                                                                                                                                                                                                |
| Keywords:                       | early child development, implementation, health systems, child health, evaluation                                                                                                                                                                                                                                                                                                                                                                                                                                                                                                                                                                                                                                                                                                                                                                                                                                                                                                                                                                                                                                                                                                                                                                                                                                                                                                                                                                                                                                                                                                                                                                                                                                                                                                                                                                                                          |

1  
2  
3  
4  
5  
6  
7  
8  
9  
10  
11  
12  
13  
14  
15  
16  
17  
18  
19  
20  
21  
22  
23  
24  
25  
26  
27  
28  
29  
30  
31  
32  
33  
34  
35  
36  
37  
38  
39  
40  
41  
42  
43  
44  
45  
46  
47  
48  
49  
50  
51  
52  
53  
54  
55  
56  
57  
58  
59  
60

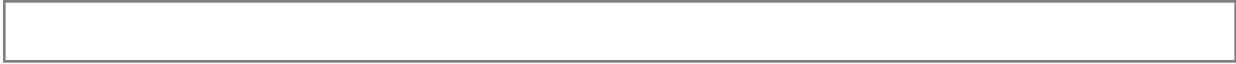

SCHOLARONE™  
Manuscripts



I, the Submitting Author has the right to grant and does grant on behalf of all authors of the Work (as defined in the below author licence), an exclusive licence and/or a non-exclusive licence for contributions from authors who are: i) UK Crown employees; ii) where BMJ has agreed a CC-BY licence shall apply, and/or iii) in accordance with the terms applicable for US Federal Government officers or employees acting as part of their official duties; on a worldwide, perpetual, irrevocable, royalty-free basis to BMJ Publishing Group Ltd ("BMJ") its licensees and where the relevant Journal is co-owned by BMJ to the co-owners of the Journal, to publish the Work in this journal and any other BMJ products and to exploit all rights, as set out in our [licence](#).

The Submitting Author accepts and understands that any supply made under these terms is made by BMJ to the Submitting Author unless you are acting as an employee on behalf of your employer or a postgraduate student of an affiliated institution which is paying any applicable article publishing charge ("APC") for Open Access articles. Where the Submitting Author wishes to make the Work available on an Open Access basis (and intends to pay the relevant APC), the terms of reuse of such Open Access shall be governed by a Creative Commons licence – details of these licences and which [Creative Commons](#) licence will apply to this Work are set out in our licence referred to above.

Other than as permitted in any relevant BMJ Author's Self Archiving Policies, I confirm this Work has not been accepted for publication elsewhere, is not being considered for publication elsewhere and does not duplicate material already published. I confirm all authors consent to publication of this Work and authorise the granting of this licence.

Paper Title: **Human resources and curricula content for early child development implementation: multi-country mixed-methods evaluation**

|                |                                                                                                                                                                                                                                                                                                                                                                                                                                                                                                                                                                                                                                                                                                                                                                                                                                                                                                                                                                                                                                                                                                                                                                                                                                                                                                                                                                                                                                                                                                                                                                                                                                                                                                                                                            |
|----------------|------------------------------------------------------------------------------------------------------------------------------------------------------------------------------------------------------------------------------------------------------------------------------------------------------------------------------------------------------------------------------------------------------------------------------------------------------------------------------------------------------------------------------------------------------------------------------------------------------------------------------------------------------------------------------------------------------------------------------------------------------------------------------------------------------------------------------------------------------------------------------------------------------------------------------------------------------------------------------------------------------------------------------------------------------------------------------------------------------------------------------------------------------------------------------------------------------------------------------------------------------------------------------------------------------------------------------------------------------------------------------------------------------------------------------------------------------------------------------------------------------------------------------------------------------------------------------------------------------------------------------------------------------------------------------------------------------------------------------------------------------------|
| Author list:   |                                                                                                                                                                                                                                                                                                                                                                                                                                                                                                                                                                                                                                                                                                                                                                                                                                                                                                                                                                                                                                                                                                                                                                                                                                                                                                                                                                                                                                                                                                                                                                                                                                                                                                                                                            |
| First author:  | Maya Kohli-Lynch <sup>1,2</sup>                                                                                                                                                                                                                                                                                                                                                                                                                                                                                                                                                                                                                                                                                                                                                                                                                                                                                                                                                                                                                                                                                                                                                                                                                                                                                                                                                                                                                                                                                                                                                                                                                                                                                                                            |
| Second author: | Victoria Ponce Hardy <sup>1</sup>                                                                                                                                                                                                                                                                                                                                                                                                                                                                                                                                                                                                                                                                                                                                                                                                                                                                                                                                                                                                                                                                                                                                                                                                                                                                                                                                                                                                                                                                                                                                                                                                                                                                                                                          |
| Alphabetical:  | Raquel Bernal Salazar <sup>3,4</sup> , Sunil Bhopal <sup>5,6</sup> , Alexandra Brentani <sup>7</sup> , Vanessa Cavallera <sup>8</sup> , Esther Goh <sup>9</sup> , Jena Hamadani <sup>10</sup> , Rob Hughes <sup>5</sup> , Karim Manji <sup>11</sup> , Kate M Milner <sup>1,12</sup> , James Radner <sup>13,14</sup> , Sonia Sharma <sup>15</sup> , Karlee Silver <sup>16</sup> , Joy E Lawn <sup>1</sup>                                                                                                                                                                                                                                                                                                                                                                                                                                                                                                                                                                                                                                                                                                                                                                                                                                                                                                                                                                                                                                                                                                                                                                                                                                                                                                                                                   |
| Last author:   | Cally J Tann <sup>1,17</sup>                                                                                                                                                                                                                                                                                                                                                                                                                                                                                                                                                                                                                                                                                                                                                                                                                                                                                                                                                                                                                                                                                                                                                                                                                                                                                                                                                                                                                                                                                                                                                                                                                                                                                                                               |
| Affiliations   | <ol style="list-style-type: none"> <li>1. Maternal, Adolescent, Reproductive and Child Health Centre, London School of Hygiene &amp; Tropical Medicine, London, UK</li> <li>2. School of Social and Community Medicine, University of Bristol, Bristol, UK</li> <li>3. Economics Department, Universidad de los Andes, Bogota, Colombia</li> <li>4. Centre de Estudios de Desarrollo Economico (CEDE), Universidad de los Andes, Colombia</li> <li>5. Maternal &amp; Child Health Intervention Research Group, Department of Population Health, London School of Hygiene &amp; Tropical Medicine, London, UK</li> <li>6. Northern School of Paediatrics, Newcastle upon Tyne, UK</li> <li>7. Departamento de Pediatria, Faculdade de Medicina da Universidade de São Paulo, São Paulo, Brazil</li> <li>8. Department of Mental Health and Substance Abuse, World Health Organization, Geneva, Switzerland</li> <li>9. Bernard van Leer Foundation, The Hague, The Netherlands</li> <li>10. Maternal and Child Health Division, International Centre for Diarrhoeal Disease Research, Dhaka, Bangladesh</li> <li>11. Department of Paediatrics and Child Health, Muhimbili University of Allied Health Allied Sciences, Dar es Salaam, Tanzania</li> <li>12. Murdoch Children's Research Institute, Melbourne, Australia</li> <li>13. Munk School of Global Affairs &amp; Public Policy, University of Toronto, Toronto, Canada</li> <li>14. Center on the Developing Child, Harvard University, Cambridge, Massachusetts, USA</li> <li>15. Mobile Crèches, Sector IV, New Delhi, India</li> <li>16. Grand Challenges Canada, Toronto, Ontario, Canada</li> <li>17. Neonatal Medicine, University College London Hospitals NHS Trust, London, UK</li> </ol> |

**Corresponding Author:** Maya Kohli-Lynch, c/- Centre for Academic Child Health, School of Social and Community Medicine, University of Bristol, 1-5 Whiteladies Road, Bristol, BS8 1NU, United Kingdom, mk17983@bristol.ac.uk

**Word count** (excluding title page, abstract, references, textboxes, tables, figures): 4710

## ABSTRACT

**Objective:** The World Health Organization recommends responsive caregiving and early learning (RCEL) interventions to improve early child development (ECD), and to achieve the Sustainable Development Goals' vision of a world where all children thrive. Implementation of RCEL programmes in low- and middle-income countries (LMIC) requires evidence to inform decisions about human resources and curricula content. We aimed to describe human resources and curricula content for implementation of RCEL projects across diverse LMIC, using data from the Grand Challenges Canada® Saving Brains® ECD portfolio.

**Setting:** We evaluated 32 RCEL projects across 17 LMIC on four continents.

**Participants:** Overall, 2,165 workers delivered ECD interventions to 25,909 families.

**Intervention:** Projects were either standalone RCEL or RCEL combined with health and nutrition, and/or safety and security.

**Primary and secondary outcomes:** We undertook a mixed-methods evaluation of RCEL projects within the Saving Brains® portfolio. Quantitative data were collected through standardised reporting tools. Qualitative data were collected from ECD experts and stakeholders and analysed using thematic content analysis, informed by literature review.

**Results:** Major themes regarding human resources included: worker characteristics, incentivisation, retention, training and supervision, and regarding curricula content: flexible adaptation of content and delivery, fidelity, and intervention duration and dosage. Lack of a universally agreed standard ECD package contributed to project heterogeneity. Incorporation of ECD into existing services may facilitate scale-up but overburdened workers plus potential reductions in service quality remain challenging. Supportive training and supervision, inducement, worker retention, dosage and delivery modality emerged as key implementation decisions.

**Conclusions:** This mixed-method evaluation of a multi-country ECD portfolio identified themes for consideration by policymakers and programme leaders relevant to RCEL implementation in diverse LMIC. Larger studies, that also examine impact, including high-

1  
2  
3 quality process and costing evaluations with comparable data, are required to further inform  
4 decisions for implementation of RCEL projects at national and regional scale.  
5  
6  
7  
8  
9

## 10 **ARTICLE SUMMARY**

### 11 **Strengths and limitations of this study**

- 12  
13  
14  
15  
16 • Scale-up of responsive caregiving and early learning (RCEL) interventions, a key  
17 domain in the World Health Organization/UNICEF/World Bank Nurturing Care  
18 Framework, requires evidence to inform decisions about human resources and  
19 curricula content for implementation.  
20  
21
- 22 • This is the first paper to report on workforce data from the large multi-country Saving  
23 Brains® early child development (ECD) portfolio. We analysed data from 32 RCEL  
24 projects based in 17 low- and middle-income countries, including a total of 2,165  
25 frontline workers who delivered ECD interventions to over 25,000 children and  
26 parents.  
27  
28
- 29 • A lack of universally agreed standard package for ECD interventions contributed to  
30 project heterogeneity within the portfolio. The importance of contextual adaptation  
31 of curricula content, human resources management, and service delivery strategies  
32 was highlighted. Development of more standardised RCEL curricula and training  
33 content for scaling would address project heterogeneity and adaptation to context.  
34  
35
- 36 • Incorporation of ECD into existing services may allow for wider scale-up, but  
37 challenges related to already high workloads plus potential reductions in service  
38 quality remain.  
39  
40
- 41 • Rigorous evaluations are required to inform decisions for implementation of RCEL  
42 projects at scale. There are almost no cost data to plan services, and we found no  
43 data on materials for workers' use.  
44  
45  
46  
47  
48  
49  
50  
51  
52  
53  
54  
55  
56  
57  
58  
59  
60

## BACKGROUND

Optimal early child development (ECD) is central to the Sustainable Development Goals' vision of a world in which children can *thrive*.(1, 2) ECD programmes have the potential to transform human capital across the life course, and scale-up of responsive caregiving and early learning (RCEL) is advocated by the World Health Organization, UNICEF and World Bank, as a key part of the Nurturing Care Framework launched in 2018 (see Box 1).(3-7) Programmes promoting RCEL have been found to be effective for ECD and related to longer term outcomes, including educational attainment and adult earnings.(5, 8)

### **Box 1: Terms for responsive care & early learning for early child development**

Multiple terms are used to describe interventions that promote early child development. The World Health Organization, UNICEF & World Bank's Nurturing Care Framework refers to a spectrum of requirements necessary for reaching full developmental potential, including: good health, security and safety, nutrition, responsive caregiving, and early learning.

In this paper, we use the concept of nurturing care, and specifically the term 'responsive care and early learning' (RCEL). RCEL describes the promotion of ECD through learning, play, and caregiving that is responsive to children's needs.(5, 9, 10) Similar terms include 'responsive care/caregiving', 'responsive stimulation', 'nurturing care', 'psychosocial stimulation', 'early learning' and 'play'.

However, there are limited data to guide practical implementation of RCEL programmes at scale in low- and middle-income countries (LMIC), and a particular lack of data regarding human resources and curricula content.(11-13) Additionally, guidance for contextual adaptation of projects is crucial but complex for RCEL which involves sectors beyond health. These gaps present challenges to decision-makers and may result in small-scale projects making design choices that limit the potential for sustainable scaling.(5, 14, 15) Thus, analysis of implementation factors for scaling of RCEL projects, particularly human resources and curricula content, is needed.(11)

The *Lancet* series 'Advancing Early Child Development: from Science to Scale' (16) and the *Annals of the New York Academy of Sciences* series 'Implementation Research and Practice for Early Childhood Development' (17) described gaps in the literature relating to ECD programming. The *Archives of Diseases in Childhood* series 'Informing design and implementation for early child development programmes' (18-22) provided evidence from

1  
2  
3 the Grand Challenges Canada® (GCC) Saving Brains® portfolio for decision points related to  
4 ECD programming but did not specifically address human resources and curricula content.  
5  
6 This paper responds to this gap, building on *Radner et al's* exploration of lessons learned on  
7 scaling from the Saving Brains portfolio, to explore human resources and curricula content in  
8 a diverse range of RCEL programmes from the same portfolio.(23) We predominantly use a  
9 health sector perspective, and contextualise our findings within learning from multi-country  
10 evaluations of community-based maternal and newborn care and evaluations of mental  
11 health and nutrition programming.  
12  
13  
14  
15  
16  
17  
18

### 19 **Aims & objectives**

20  
21 This paper aims to describe human resources and curricula content for implementation of  
22 RCEL projects across diverse LMIC, using data from the Saving Brains portfolio. We will  
23 address *who* delivers the project, including training, supervision and inducement; and *what*  
24 the specific curricula content is, including materials, intensity, quality, fidelity and adaptation.  
25  
26  
27  
28

29 Objectives are to:

- 30  
31 1. Quantitatively analyse human resources and curricula content for RCEL projects in the  
32 Saving Brains portfolio.
- 33  
34 2. Qualitatively analyse programme design and implementation decisions, focusing on  
35 themes related to human resources and curricula content.
- 36  
37 3. Synthesise lessons learned and implications for future design and implementation of  
38 RCEL programmes at scale.  
39  
40  
41  
42  
43

### 44 **METHODS**

45  
46 We took a mixed-methods approach, incorporating quantitative data from an evaluation of  
47 projects in the Saving Brains portfolio alongside qualitative data from in-depth interviews  
48 (IDI) and focus group discussions (FGD) with ECD experts and Saving Brains project leads.  
49 Impact and outcome data were not available for the majority of projects at the time of the  
50 evaluation and were therefore not included in the evaluation.  
51  
52  
53  
54  
55  
56  
57  
58  
59  
60



## Overview of the Saving Brains Portfolio evaluation

Saving Brains is a diverse portfolio of projects, each aimed at improving ECD in LMIC through interventions in the first thousand days, as outlined by *Radner et al.*(23) Projects sought to improve brain development through preventing brain injury, promoting stimulating and responsive environments and/or protecting children from developmental risk factors.(18) An evaluation of Saving Brains was undertaken in 2016-2017 by a team from the London School of Hygiene & Tropical Medicine in collaboration with the Saving Brains Platform team of experts, led by TruePoint Center/Harvard University and the World Health Organization.(24) The team evaluated 39 Saving Brains Seed and Transition-To-Scale (TTS) grants awarded between 2012 and 2016 to project leads from LMIC with variable design and implementation approaches (see *Milner et al.* for summary of projects).(18) Seed grants focused on demonstration of 'proof of concept' over 18-24 months while TTS grants focused on progression towards scale in partnership with other organisations over 3 years. The portfolio evaluation used a conceptual evaluation framework (Web Appendix Figure A), based around the Medical Research Council Guidance on Evaluation of Complex Interventions and was developed around a portfolio-level 'theory of change' (developed by Saving Brains Platform members) to systematically describe and assess human resource and curricula content implementation factors (Web Appendix Figure B).(25) The 'theory of change' metric indicators directly relate to Results-based Management and Accountability Framework data points (see below) collected by each project.

### Objective 1. Quantitative data sources and analyses

#### *Quantitative data sources*

Quantitative data on project design and implementation were collected from GCC pre-specified data collection tools (Web Appendix Table A). Service Delivery Forms (SDFs) comprised data regarding human resources and RCEL curricula and the Results-based Management and Accountability Framework (RMAF) comprised data on numbers of recipients and beneficiaries, child growth and development outcomes, parental and home environment outcomes, and funding, coverage and context of projects. Data were extracted from SDFs and RMAFs and imported into Microsoft Excel for cleaning, management and analysis (May-Nov 2016).

### *Quantitative analysis*

Descriptive statistics relating to frequency and mode of outcome measurement across the portfolio were generated using Stata 14 and Microsoft Excel. Data on occupation of workers delivering the RCEL projects were classified according to the International Standardised Classification of Occupations.(26) For quantitative analysis, projects were grouped to highlight differences in implementation design factors. Groupings were as follows i) all RCEL projects ii) standalone RCEL projects and iii) integrated RCEL projects, where 'integrated projects' were integrated with another domain of the Nurturing Care Framework (other than RCEL) and 'standalone projects' were not.

## **Objective 2: Qualitative data sources and analyses**

### *Literature review and topic guides*

IDI and FGD were facilitated using topic guides, which were developed based on a literature review guided by the Consolidated Criteria for Reporting Qualitative Research. The review explored implementation experiences relating to human resources and curricula content amongst ECD experts and Saving Brains project leads. Thematic areas of enquiry (Web Appendix Table B) were established based on the literature, stakeholder consultation, and analysis of written project proposals and progress reports submitted by project leads to GCC (Web Appendix Table A). Our analysis was also informed by examples from the literature of similar efforts to support decision-making for implementation in other maternal and newborn health projects in LMIC.

Medline and Embase were searched, with the following MeSH terms; 'Child development' OR 'Developmental Disabilities' AND 'Developing Countries'. Additional articles were retrieved through reference lists of identified articles and publications from the Saving Brains community. Grey literature was searched via websites of major multilateral organisations engaged in ECD programming including the World Health Organization, UNICEF, Save the Children Fund, the World Bank, World Vision International, other related organisations, and Google.

### *Qualitative data inputs from key informant interviews and focus group discussions*

1  
2  
3 Key informants (n=19) were ECD experts implementing ECD programmes in LMIC (Web  
4 Appendix Table C). ECD experts were purposively selected from professional networks  
5 including national and international programmers and policy makers, ECD researchers,  
6 Saving Brains project leads, and members of the Saving Brains Platform and GCC. All key  
7 informants were invited to participate by email. IDI were conducted with key informants and  
8 FGD with Saving Brains project leads, with between 4 and 10 participants per FGD. All  
9 participants provided verbal informed consent and data collection was concluded once  
10 saturation was reached.  
11  
12  
13  
14  
15  
16  
17  
18

19 IDI and FGD were conducted in English (Jun-Oct 2016) and were audio recorded or  
20 transcribed by a member of the evaluation team. Each IDI lasted approximately 60 minutes  
21 while each FGD lasted between 60 and 90 minutes. All IDI and FGD were conducted face-to-  
22 face or via an online video link. Interviewers and FGD facilitators summarised and verified  
23 throughout data collection to improve validity of results. Meetings of Saving Brains  
24 innovators and partners on prioritising research in ECD and strategies for implementation of  
25 interventions were audio recorded and/or transcribed. Audio recordings of IDI, FGD and  
26 meetings were submitted to a third party for transcription. Members of the Saving Brains  
27 evaluation team conducted IDI (MKL, KMM and VC) and facilitated FGD (CJT, KMM, VC)  
28 alongside members of the Saving Brains platform.  
29  
30  
31  
32  
33  
34  
35  
36  
37

38 Qualitative data also included Saving Brains project progress reports; written narratives on  
39 implementation challenges and mitigation strategies.  
40  
41  
42

### 43 *Qualitative analysis*

44  
45  
46 Written project documents and transcribed IDI and FGD were de-identified, imported and  
47 coded in NVivo 11. Data were independently coded line-by-line by two members of the  
48 evaluation team (MKL, KMM). An inductive approach was used to create a coding framework,  
49 and thematic content analysis was undertaken to explore themes related to human resources  
50 and curricula content until saturation was reached. Inter-rater coding reliability was high on  
51 review of NVivo 11 coding reports.  
52  
53  
54  
55  
56

### 57 **Patient and Public Involvement**

This evaluation was conducted without direct patient involvement and they did not contribute to the interpretation of results or writing and editing of this document. However, families were frequently involved in different aspects of the design and interpretation of individual projects within Saving Brains including, but not limited to, the materials used in intervention delivery and methods for incentivising participation.

### Ethics approval

The study was approved by the London School of Hygiene & Tropical Medicine Ethics Committee (16001/RR/11202).

## RESULTS

### Overview: quantitative and qualitative results

32 of the 39 Seed and TTS projects included some aspect of RCEL (Figure 1); the 7 non-RCEL projects were not included in this analysis. Of these 32 projects, 34% (n=11) projects were standalone RCEL interventions and 66% (n=21) were integrated with interventions in 'health and nutrition' (10 projects), 'security and safety' (9 projects) or both (2 projects) (Figure 1). Projects were implemented in 17 LMIC across four continents (see Figure 2).

IDI were conducted with 66% (n=21) of Saving Brains project teams including all TTS projects. Emergent themes from the qualitative analysis are presented in Table 1. Saving Brains TTS project leads provided quantitative data on these emergent themes (Table 2).

**Table 1:** Themes and sub-themes from quantitative and qualitative data analysis for 32 Saving Brains projects, and 19 key informant in-depth interviews regarding human resources and curricula content for ECD programming

|                             | Themes                                   | Sub-themes                                         |
|-----------------------------|------------------------------------------|----------------------------------------------------|
| Human Resources             | 1. Characteristics / selection of worker | 1.1 Health vs other sector                         |
|                             |                                          | 1.2 Integration with existing programmes           |
|                             |                                          | 1.3 Pre-existing government worker vs novel worker |
|                             |                                          | 1.4 Professional vs lay worker                     |
|                             |                                          | 1.5 Qualities and qualifications                   |
|                             | 2. Inducement and retention              | 2.1 Modalities of incentivisation                  |
|                             |                                          | 2.2 Impact on pre-existing workers                 |
| 3. Training and supervision | 3.1 Content of training                  |                                                    |
|                             | 3.2 Flexibility vs fidelity              |                                                    |

|                          |                                  |                                        |
|--------------------------|----------------------------------|----------------------------------------|
| <b>Curricula content</b> | 4. Content and components        | 3.3 Education theory                   |
|                          |                                  | 3.4 Supportive relationships           |
|                          |                                  | 4.1 Defining critical components       |
|                          |                                  | 4.2 Formative work and adaptation      |
|                          | 5. Delivery, duration and dosage | 4.3 Flexibility vs fidelity            |
|                          |                                  | 4.4 Behaviour change                   |
|                          |                                  | 5.1 Adapting delivery to local context |
|                          |                                  | 5.2 Intervention duration and dosage   |
|                          |                                  | 5.3 Retention of participants          |

**Table 2:** Description of the Saving Brains responsive care and early learning (RCEL) Transition-to-Scale projects: Summary of human resources and curricula content (N=4 projects)

| <b>Project Name</b>                                                       | <b>Transition to scale of an integrated program of nutritional care and psychosocial stimulation to improved malnourished children’s development</b> | <b>An integrated intervention targeted at deprived pre-school children in rural areas</b> | <b>Home visiting programs to improve early child development and maternal mental health</b>           | <b>Saving Brains, Changing Mindsets</b>                                                           |
|---------------------------------------------------------------------------|------------------------------------------------------------------------------------------------------------------------------------------------------|-------------------------------------------------------------------------------------------|-------------------------------------------------------------------------------------------------------|---------------------------------------------------------------------------------------------------|
| <b>Lead Institution</b>                                                   | <b>International Centre for Diarrhoeal Disease Research (ICDDR,B)</b>                                                                                | <b>Universidad de los Andes (UDLA)</b>                                                    | <b>Faculdade de Medicina da Universidade de Sao Paulo (USP)</b>                                       | <b>Mobile Crèches for Working Mothers’ Children (MC)</b>                                          |
| <b>Country</b>                                                            | <b>Bangladesh</b>                                                                                                                                    | <b>Colombia</b>                                                                           | <b>Brazil</b>                                                                                         | <b>India</b>                                                                                      |
| <b>Site</b>                                                               | Dhaka area: Narsingdi and Kishoreganj. Rural                                                                                                         | Central rural regions: Boyacá, Cundinamarca, Santander                                    | Sao Paulo, urban slums in western area                                                                | Delhi area, Bangalore, Ahmedabad, Chandigarh                                                      |
| <b>Vision/ Goal/ Objectives</b>                                           | Integrate RCEL intervention for poor, underweight children into routine government health services                                                   | Improve quality of a pre-existing public parenting programme in a scalable fashion        | Evaluate the efficacy and cost-effectiveness of two alternative platforms for home visiting programme | Demonstrate scalability of workplace-based childcare for children of migrant construction workers |
| <b>No. participating children</b>                                         | 1,597                                                                                                                                                | 2,134                                                                                     | 800                                                                                                   | 4,845                                                                                             |
| <b>HUMAN RESOURCES</b>                                                    |                                                                                                                                                      |                                                                                           |                                                                                                       |                                                                                                   |
| <i>Type</i>                                                               | Assoc Health Professional                                                                                                                            | Lay community member as paraprofessional                                                  | CHW and CDA                                                                                           | Personal care worker                                                                              |
| <i>Pre-existing / novel cadre</i>                                         | Pre-existing                                                                                                                                         | Pre-existing                                                                              | CHWs pre-existing, CDAs novel cadre                                                                   | Pre-existing                                                                                      |
| <i>Incentivisation, including remuneration</i>                            | Occasional small gifts.                                                                                                                              | Remunerated by government                                                                 | 30% elevated salary pre-existing CHWs, salary-matched CDAs                                            | Salaried                                                                                          |
| <i>Qualification/ skill / competence</i>                                  | Technical qualification                                                                                                                              | Secondary education                                                                       | No qualification needed                                                                               | Primary & Secondary education                                                                     |
| <i>Gender of workers</i>                                                  | Majority female                                                                                                                                      | Majority female                                                                           | Exclusively female                                                                                    | Majority female                                                                                   |
| <i>Length of training</i>                                                 | 15 days                                                                                                                                              | 85 hrs over 3.5 weeks                                                                     | 40 hrs initial (Reach Up) & 32 hrs refresher                                                          | 36 days                                                                                           |
| <i>No. of workers recruited (completing training, delivering project)</i> | 354 (320, 168)                                                                                                                                       | 171 (171, 171)                                                                            | 15 (15,13)                                                                                            | 139 (83, 67)                                                                                      |
| <i>Frequency of supervision</i>                                           | Minimum once per month.                                                                                                                              | Every six weeks.                                                                          | Once per week.                                                                                        | Six months rigorous, then monthly.                                                                |
| <b>CURRICULA CONTENT</b>                                                  |                                                                                                                                                      |                                                                                           |                                                                                                       |                                                                                                   |
| <i>Group vs individual</i>                                                | 2 or 4-5 dyads                                                                                                                                       | 80% grp, 20% individual                                                                   | All individual                                                                                        | 70% grp, 30% individual                                                                           |
| <i>Duration of intervention</i>                                           | 12 months                                                                                                                                            | 11 months                                                                                 | 12 months                                                                                             | 3 months                                                                                          |
| <i>Average length of sessions</i>                                         | 50 mins                                                                                                                                              | 1 hr                                                                                      | 1 hr                                                                                                  | 8 hrs (full creche day)                                                                           |
| <i>Number of sessions</i>                                                 | 25                                                                                                                                                   | 55                                                                                        | 24                                                                                                    | 75                                                                                                |
| <i>Freq. of contacts per month</i>                                        | 2                                                                                                                                                    | 3                                                                                         | 2                                                                                                     | 25                                                                                                |
| <i>Materials</i>                                                          | Play materials                                                                                                                                       | Books, puzzles, images, and toys (recyclable materials)                                   | Books, puzzles, images and toys (recyclable materials)                                                | Play materials, blocks, puzzles, big picture books, toys (low cost)                               |

| Project Name                  |                 | Transition to scale of an integrated program of nutritional care and psychosocial stimulation to improved malnourished children's development | An integrated intervention targeted at deprived pre-school children in rural areas | Home visiting programs to improve early child development and maternal mental health | Saving Brains, Changing Mindsets               |
|-------------------------------|-----------------|-----------------------------------------------------------------------------------------------------------------------------------------------|------------------------------------------------------------------------------------|--------------------------------------------------------------------------------------|------------------------------------------------|
| Curriculum                    |                 | Adaptation of Reach Up                                                                                                                        | Adaptation of Reach Up                                                             | Adaptation of Reach Up                                                               | Thematic curriculum on school readiness skills |
| Use of digital media          |                 | None                                                                                                                                          | None                                                                               | None                                                                                 | None                                           |
| Mechanism of behaviour change | Mentoring       | Yes                                                                                                                                           | Yes                                                                                | Yes                                                                                  | Yes                                            |
|                               | Problem-solving | Yes                                                                                                                                           | Yes                                                                                | -                                                                                    | -                                              |
|                               | Didactic        | -                                                                                                                                             | -                                                                                  | -                                                                                    | -                                              |
|                               | Demonstrations  | Yes                                                                                                                                           | Yes                                                                                | Yes                                                                                  | Yes                                            |
|                               | Service mapping | -                                                                                                                                             | -                                                                                  | -                                                                                    | -                                              |
|                               | Empowerment     | Yes                                                                                                                                           | Yes                                                                                | Yes                                                                                  | Yes                                            |
|                               | Peer support    | Yes                                                                                                                                           | Yes                                                                                | -                                                                                    | -                                              |
|                               | Media           | -                                                                                                                                             | -                                                                                  | -                                                                                    | -                                              |
| Materials                     | Yes             | -                                                                                                                                             | Yes                                                                                | -                                                                                    |                                                |
| Published references          |                 | (23, 27, 28)                                                                                                                                  | (23, 29)                                                                           | (23,25)                                                                              | (23, 30)                                       |

CDA=Child Development Agents, CHW=Community Health Worker

## Human resources in ECD projects: themes and sub-themes

Three major human resources themes and eleven sub-themes were identified (Table 1).

### 1. Characteristics / selection of workers

Variation in workforce across the Saving Brains portfolio is summarised in Figure 3. The use of health or associate health professionals, such as community health workers, was common. Health professionals commonly delivered projects that included health and nutrition domains (Figure 3a). Lay community members were also common as frontline workers across all project types.

Integrating ECD projects into existing programmes was identified by informants as a key challenge.

*"Early child development is harder than anything because of its integrated nature.... ..we all decided that services had to be fully integrated....and this has imposed an operational burden that is very complicated."* – Saving Brains TTS project lead

Approximately one third of workers (34% n=11/32) had either only primary school-level or no education (Figure 3b). Tertiary-level education of workers was more common for RCEL projects which included health and nutrition domains (42%, n=5) (Figure 3b), likely reflecting

1  
2  
3 the greater representation of healthcare professionals delivering these integrated  
4 interventions.  
5  
6

7  
8 Soft skills including interpersonal and communication skills were identified as important by  
9 project leads.  
10

11  
12 *"We have learned a lot about the type of person that can fill the health promoter role. It*  
13 *is important that he/she is committed to the project, responsible, and loves working with*  
14 *kids, especially this age group."* – Saving Brains Seed project lead  
15  
16

17  
18 *"Having a champion in the field is crucial for success...combination of strength and*  
19 *kindness; excellent interpersonal skills; problem solver; works with all stakeholders."* –  
20 Saving Brains TTS project lead  
21  
22

23  
24 A key choice in ECD implementation was whether to use established or novel cadres of  
25 worker. In some projects, novel cadres of worker were recruited to support quality of  
26 implementation. However, limitations of this approach were acknowledged with regards to  
27 sustainability.  
28  
29

30  
31 *"...even after identifying and training them there is no assurance that the government*  
32 *will take up the process."* – Saving Brains TTS project lead  
33  
34

35  
36 Conversely, while a number of projects used pre-existing frontline workers, key informants  
37 also expressed concerns regarding direct control over recruitment, incentivisation,  
38 supervision, and training when shared with a partner organisation (Web Appendix Table D,  
39 ICDDR,B & USP). The increased burden, change in focus, and challenge in coordination for  
40 pre-existing salaried workers was also highlighted by experts and project teams.  
41  
42

43  
44 *"It's a big challenge...you take a health worker and add a 24<sup>th</sup> task to her 23<sup>rd</sup> task,*  
45 *which are requested by six different funders with no coordination between any of*  
46 *them."* - ECD Lead for an International NGO  
47  
48

49  
50 *"They think [to themselves], 'I'm dealing with dengue and Zika and you expect me to*  
51 *play with a child for an hour.'"* – Saving Brains TTS project lead  
52  
53

## 54 55 56 57 58 59 60 2. Provision of incentives based on performance (inducement)

1  
2  
3 Overall, most (61%) project workers were salaried (Figure 3c). However, considering lay  
4 community member workers only, 20% of projects offered no incentives, and a further 20%  
5 offered only a contribution to expenses (Figure 3c). Key informants expressed a range of  
6 opinions about remuneration of community health workers. Some cited elevated status  
7 within the community and personal satisfaction as a non-financial incentivisation. In contrast,  
8 concerns were expressed regarding sustainability and human rights implications of  
9 implementation models that relied on voluntary workers, who were often socially  
10 disadvantaged women. However, all health and most allied health professionals were  
11 salaried and financial remuneration for these groups was considered a key part of  
12 inducement.  
13  
14  
15  
16  
17  
18  
19  
20  
21

22  
23 *"Asking clinic staff to conduct the sessions meant additional tasks for them and they had*  
24 *to spend longer hours in the clinic. They therefore had expectations to be paid some*  
25 *wages for this extra task, but our goal was to integrate the activity into their daily routine*  
26 *hours to make it sustainable."* – Saving Brains TTS project lead  
27  
28  
29  
30

31 Staff recruitment and retention was a major recurring theme. Of the 2,572 workers recruited  
32 to deliver ECD interventions across the Saving Brains RCEL projects, 2,433 (95%) completed  
33 initial training and, of those trained, 2,165 (84%) ultimately delivered the intervention (Figure  
34 3d). Across the portfolio, retention was most challenging amongst salaried staff who were  
35 mostly health staff with 67% of salaried workers trained delivering the intervention (Figure  
36 3d). Specific reasons for drop-off were not available from existing data.  
37  
38  
39  
40  
41  
42

43 During programme planning, several teams described strategies including 'over-recruitment'  
44 to allow for anticipated staff attrition.  
45  
46

47 *"In this next phase, we trained many more promoters than we needed, approximately*  
48 *twice as many as we originally needed in order to have a healthy resource base."* –  
49 Saving Brains Seed project lead  
50  
51  
52  
53

54 *"It was hard to get [the staff], but we were very successful in keeping them. ... We paid*  
55 *them well which is something that I don't know that the government will be able to*  
56 *do. They also had a lot of support and a lot of training. They really appreciated all*  
57 *that they received from our team..."* – Saving Brains TTS project lead  
58  
59  
60



### 3. Training and supervision

A wide variation in supervision frequency, duration and ratios, and training structure and duration was seen across projects (Table 3).

**Table 3:** Supervision and training of workers delivering responsive care and early learning Saving Brain projects

|                                                                      | Median      | Range  | Inter-quartile range |
|----------------------------------------------------------------------|-------------|--------|----------------------|
| <b>Number of days in training (N=31)</b>                             | 10          | 0-90   | 5-13.6               |
| <b>Number of trainees per workshop (N=31)</b>                        | 10          | 0-50   | 5-20                 |
| <b>Frequency of supervision (N=28)</b>                               | 2 per month | 0-10   | 1.5-4                |
| <b>Duration of supervision (N=27)</b>                                | 2 hours     | 0-8    | 1-4                  |
| <b>Ratio of supervisor to trainee during training session (N=20)</b> | 3:20        | 0.04-2 | 0.1-0.2              |

\*Data from Saving Brains standardised programme reporting 'Service Delivery Form'. Missing data for 1 project on number of days in training and number of trainees per workshop, 4 projects did not report on frequency of supervision and 5 projects on duration. 12 projects did not report on the ratio of supervisor to trainee.

Training and supervision emerged as major themes during qualitative analysis (Table 1). Within training, the need to not only address details of ECD curricula but also a diverse range of related issues including pedagogy, strategies for managing the emotional load of work and administrative requirements, communication skills, and problem-solving abilities were identified. Several key informants also highlighted the value of observational supervision.

*"...not only to see that content is delivered but that it is delivered in a way that parents will be responsive to."* – Saving Brains TTS project lead

The importance of flexible training and supervision protocols that were feasible for staff who had multiple roles and were likely to be sustainable with scale-up was also emphasised.

*"Ongoing training including proficiency evaluations and feedback build confidence in participating community health workers to apply the tools and methodologies to deal with mothers and children. We have learned this over the years of work with community health workers and plan to systematize the work into teaching protocols as part of the transition to scale phase."* – Saving Brains TTS project lead

1  
2  
3 Key informants highlighted the need to develop formal structures for high-quality supportive  
4 training and supervision at all staff levels; this was particularly important in maintaining  
5 fidelity during intervention scale-up (Web Appendix Table D). In addition, discussions  
6 emphasised the importance of peer support amongst workers (Web Appendix Table D).  
7  
8  
9

### 10 11 **Curricula content: themes and sub-themes** 12

13  
14 Two major themes and seven sub-themes were identified with respect to curricula content  
15 (Table 1).  
16

#### 17 18 19 4. *Content and components* 20

21  
22 Improved understanding of the critical components of RCEL interventions was a major theme  
23 identified by key informants as crucial to sustainability and scale-up.  
24

25  
26 Many projects provided general descriptions of content (e.g. parenting programme,  
27 responsive parenting, nutrition) or the original curriculum from which their project was  
28 developed (commonly the established Jamaican 'Reach Up' curricula) (Table 2). (21) However,  
29 for many, the critical components were less well defined and described. Specifically, details of  
30 activities for different ages or developmental stages, child health or nutrition components,  
31 behavioural change approaches used, pedagogy, and materials were typically limited. Lack of  
32 an established and standardised framework for describing curricula content was identified by  
33 key informants as a barrier to improved reporting and understanding design factors  
34 responsible for impact.  
35  
36  
37  
38  
39  
40  
41  
42

43  
44 The importance of formative research and piloting for development and adaptation of  
45 interventions to setting was highlighted.  
46

47  
48 *"Project development is also really important...these projects are not 'off-the-shelf"*  
49 *'ready-to-go'."* – ECD expert  
50  
51

52  
53 Additionally, the importance of balancing project flexibility, fidelity and content  
54 heterogeneity with clear, specific and structured curricula was emphasised.  
55  
56  
57  
58  
59  
60

1  
2  
3  
4  
5  
6  
7  
8  
9  
10  
11  
12  
13  
14  
15  
16  
17  
18  
19  
20  
21  
22  
23  
24  
25  
26  
27  
28  
29  
30  
31  
32  
33  
34  
35  
36  
37  
38  
39  
40  
41  
42  
43  
44  
45  
46  
47  
48  
49  
50  
51  
52  
53  
54  
55  
56  
57  
58  
59  
60

*"The other determinant of success I would say is... we were able to develop a contextualized project, delivery product and processes." – Saving Brains Seed project lead*

Specific materials and activities often required guided cultural adaptation to maintain fidelity (Web Appendix Table D). However, it is important to note that key informants placed equal emphasis on behaviour change mechanisms as well as on specific curricula activities and materials.

*"Key components [were] inspiration, confidence... empathy, attachment of mothers and children to the deliverer...assessment for change." – Saving Brains Seed project lead*

##### 5. Delivery, duration and dosage

The importance of project delivery, duration and dosage emerged as a major theme in the analysis. Figure 4 summarises the method and duration of delivery of ECD interventions. The proportion using groups to deliver the intervention was highest amongst standalone RCEL projects and lowest amongst integrated approaches (Figure 4a). Duration of sessions generally lasted longer for groups than individual visits (Figure 4b).

ECD investigators reported that the decision regarding group or individual delivery approach was influenced more by context, efficiency, and feasibility than effectiveness.

*"Our problem...was trying to do something that we thought was evidence based, but that was not a good fit with the socio-political structures and the way people are comfortable in trying new things." – Saving Brains Seed project lead*

Key informants highlighted 'dosage' of the intervention as an important design decision. The median number of project sessions delivered, length of sessions, and length of intervention, ranged broadly (Table 4).

**Table 4:** Summary of project sessions including duration and intensity amongst responsive care and early learning Saving Brain projects (n=32)

|  | Median | Range | Inter-quartile range |
|--|--------|-------|----------------------|
|--|--------|-------|----------------------|

|                                            |             |                 |                |
|--------------------------------------------|-------------|-----------------|----------------|
| <b>Number of project sessions (N=29)</b>   | 24 sessions | 2-192 sessions  | 11-37 sessions |
| <b>Total length of intervention (N=26)</b> | 12 months   | 1-24 months     | 8-12 months    |
| <b>Length of sessions (N=26)</b>           | 1 hour      | 10 mins-8 hours | 45-90 minutes  |

Data from Saving Brains standardised programme reporting 'Service Delivery Form'. Missing data on number of project sessions for three projects, and on total length of intervention and length of sessions for six projects.

The majority (60%, n=19) of projects were primarily targeted at the child or caregiver level as opposed to targeting families or the community more broadly. Geographical, political and economic factors were important in engaging target populations.

*"...some mothers find it difficult to come to the clinics for the fortnightly sessions. The reasons were lack of time, distance from the clinic, not allowed by the father or grandparents of the child and occasionally travelling outside the area."* – Saving Brains

TTS project lead

Project teams used a range of methods to incentivise caregivers to attend sessions. One TTS team trialled both provision of oil supplementation and 'motivational meetings' (Table 2, ICDDR,B); both methods were found to be effective but motivational meetings were adopted due to sustainability.

## DISCUSSION

This is the first paper to report on workforce data from a large multi-country child development portfolio, including 32 RCEL projects with 2,165 workers delivering interventions across 17 LMIC. This analysis addresses human resources and curricula content for implementation at scale; it is noted that these factors do not stand in isolation but interact with each other and other programme design factors as well as with local contexts. *Radner et al.*'s exploration of the Saving Brains portfolio highlighted that workforce decisions around delivery of RCEL programmes can have substantial bearings on programme sustainability and impact. In this paper, we built on this to further probe specifics of workforce choices in ECD programme implementation, particularly from a health sector perspective.<sup>(13, 23)</sup> Resultant themes and sub-themes resonate with and extend existing literature regarding workforce choices, particularly the community health workforce, for programme implementation in LMIC settings.

1  
2  
3 Workforce factors are one of the most critical impediments to implementation at scale. This  
4 is well recognised for ECD programmes, especially given intersectoral complexities. Our  
5 results suggest that whilst challenges exist for integrating ECD into existing services,  
6 introducing novel cadres of worker for standalone ECD programmes may be also challenging  
7 at scale. Within this analysis, challenges related to adding ECD workstreams to the existing  
8 workload of established frontline workers were clearly reported and may have contributed to  
9 poorer retention of salaried health workers, alongside rotation of health workers. This finding  
10 has been mirrored across the implementation literature in other areas of global health; for  
11 example, an economic analysis of community based maternal and newborn care across  
12 seven countries highlighted trade-offs between improved cost-effectiveness associated with  
13 use of existing multipurpose workers and difficulties related to overburdening those  
14 workers.(31-35)

15  
16 Ongoing supportive supervision, not just initial training, was found to be crucial to  
17 intervention quality and fidelity, as has been found in global health more broadly. For  
18 example, quality supervision was emphasised as central to preservation of project quality as  
19 well as worker motivation in the economic analysis of maternal and newborn care mentioned  
20 above, and was examined in more detail in several of these evaluations, including the cluster  
21 randomised controlled Goodstart (III) trial of maternal and newborn care in South Africa.(32,  
22 36) Similarly, supervision and training, and particularly the potential of e-supervision/training,  
23 were highlighted as key concerns for project feasibility in a review of interventions for  
24 children with intellectual disabilities (37) and additionally were found to be critical for  
25 sustainable scale and impact in both PRIME (Programme for Improving Mental Health Care)  
26 and a follow-up study of a cluster randomized trial of a psychosocial ECD project in  
27 Colombia.(33, 38, 39)

28  
29 The challenge of retention of workers emerged as an important theme and is also not  
30 isolated to ECD. Within the Saving Brains portfolio, strategies used to mitigate against poor  
31 retention echoed findings in other global health implementation research including; over-  
32 recruitment, fast-track training, and provision of high-quality training and supervision.(33, 36,  
33 39) *Andrew et al* suggest designing interventions according to geographical practicalities and  
34 other contextual factors to mitigate staff turnover, and thus optimise project quality and  
35 impact.(38) There is appetite for shared learning to help tackle the human resource

1  
2  
3 challenges highlighted in this paper, and resources such as the Early Childhood Workforce  
4 Initiative provide a useful platform for ECD policymakers and programmers globally to work  
5 together.(40, 41)  
6  
7  
8

9  
10 Regarding essential ECD intervention curricula and components for scale-up, commonalities  
11 were seen amongst the larger TTS projects which add to previous literature on this topic.(3,  
12 14) However, there is no agreed standard package for ECD set out by the UN, contributing to  
13 project heterogeneity and precluding clear guidance for policymakers and programmers on  
14 ECD intervention content. This lack of standardised content is in contrast to more biomedical  
15 programmes, such as antenatal and postnatal care packages, as well as broader mental  
16 health and nutrition programmes which, though similar to ECD in their intersectoral nature,  
17 do have some standardised content, such as the World Health Organization and UNICEF's  
18 Infant and Young Child Feeding approach.(31, 42, 43) While lack of description of  
19 intervention content in this portfolio hinders specific recommendations for a standardised  
20 ECD curricula, our findings suggest that the focus of a standardised ECD curricula should be  
21 on engaging parents in activities which promote development, rather than providing  
22 information on developmental milestones, as is seen in many countries.  
23  
24  
25  
26  
27  
28  
29  
30  
31  
32  
33

34 Even with a standard package, contextualisation would be important, and our findings  
35 underline the need for formative research. Across the Saving Brains portfolio, there was a  
36 noticeable lack of in-depth description of curricula content, despite key informants  
37 highlighting this as important for sustainability.(14, 15) A framework for describing  
38 contextualised content of RCEL projects using, for example, parameters described by *Aboud*  
39 *et al* (information, performance, problem-solving, social support, materials and media) would  
40 provide clarity in the literature and strengthen programme comparison and evaluation.(14,  
41 44) Further, as the Nurturing Care Framework proposes, delineating ECD programmes more  
42 clearly into universal, targeted, and indicated packages to respond to the specific needs of  
43 children at particular developmental risk or with developmental disabilities would support  
44 better inclusion of children who otherwise risk not being reached by universal or  
45 conventional service models.(7, 45-47) As *Boggs et al* highlight, improved developmental  
46 monitoring is critical, and ECD workers have a vital role to play in identifying the young  
47 children most at risk of developmental difficulty and referring for ECD intervention, as well as  
48 in intervention delivery.(21) While there is little published literature on early intervention to  
49  
50  
51  
52  
53  
54  
55  
56  
57  
58  
59  
60

1  
2  
3 improve health and developmental outcomes for children with disabilities in LMIC, trials are  
4 underway and emerging models that have been adapted and that are being trialled in the  
5 context of the Zika epidemic may be informative.(48, 49)  
6  
7  
8  
9

10 Regarding delivery strategy, group sessions were frequently favoured across the Portfolio,  
11 notably based on increased practicality, efficiency, and acceptability, rather than increased  
12 effectiveness.(23) Previous evidence for both ECD and health programmes supports the use  
13 of a combination of home visits and group sessions as more effective in terms of information  
14 consolidation and parental behavioural change.(8, 14, 50) Future ECD research would benefit  
15 from an alignment of outcomes, where feasible, to ensure comparability in assessment of  
16 effectiveness. Intervention dosage was variable across the Portfolio and the need for  
17 flexibility in this when adapting to different contexts, for example during implementation of  
18 the 'Reach Up' package in Brazil, frequently emerged during analysis.(51) Dosage variability  
19 was similarly reported during the Goodstart (III) trial and was attributed to contextual and  
20 workforce factors including occupation, remuneration, and community recognition of  
21 workers.(36)  
22  
23  
24  
25  
26  
27  
28  
29  
30  
31  
32

### 33 **Strengths and Limitations**

34  
35 Many of the limitations of this evaluation are common to ECD programming more broadly.  
36 Several process-related metrics were not commonly reported including coverage, equity, and  
37 cost-effectiveness, likely influenced by the small-scale and 'proof of concept' nature of most  
38 projects.(39) The donor-facing system of data collection and reporting within the portfolio  
39 may have introduced bias, with investigators feeling obliged to report positively, however  
40 the open learning culture within the Saving Brains Platform acted to substantially reduce this.  
41 Grant awardees were selected by GCC and so projects and their aims may reflect funder  
42 priorities. The diversity in human resources and curricula content between projects made it  
43 difficult to draw conclusions for individual RCEL programme implementation from the  
44 portfolio-level evaluation outcomes. Impact data was not available for most projects at the  
45 time of the evaluation and so assessment of impact was not included. Enhancing linkages  
46 between implementation processes and impacts within this portfolio and more broadly has  
47 the potential to strengthen evidence to inform policy and programming. Additionally, while  
48 this paper describes design decisions, there was not scope to explore the reasons behind  
49  
50  
51  
52  
53  
54  
55  
56  
57  
58  
59  
60

1  
2  
3 these decisions. Exploration of these reasons may contribute to stronger and clearer  
4 evidence, policy and programming.  
5  
6

## 7 8 **CONCLUSION**

9  
10 We have reported on the largest study to date of workforce and curricula content for ECD  
11 from a large and varied portfolio of 32 projects, providing a detailed description and new  
12 synthesis about implementation challenges and enablers for ECD programming. Despite  
13 heterogeneity of projects, clear themes have emerged with parallels to LMIC programmatic  
14 learning in other areas, such as global mental health and nutrition. Development of a more  
15 standardised package or planning guide for ECD programmes would mitigate some of the  
16 challenges reported here, but programmes still need to be adapted to context. Carrying out  
17 and learning from such adaptation could be supported by a common framework for  
18 describing content and delivery strategies. More systematic evaluations of implementation  
19 costs, including worker costs will be essential inputs for planning of routine ECD  
20 programmes, within and beyond the health sector. Further research investigating  
21 associations between human resource and curricula content choices and, importantly, impact  
22 is needed.  
23  
24  
25  
26  
27  
28  
29  
30  
31  
32  
33

## 34 35 **FIGURE CAPTIONS/LEGENDS**

36  
37  
38 Figure 1: Project inclusion flow chart: inclusions and subsets of responsive care and early  
39 learning projects from the Saving Brains portfolio (n=39)  
40  
41

42  
43 Figure 2: Project inclusion flow chart: inclusions and subsets of responsive care and early  
44 learning projects from the Saving Brains portfolio (n=39)  
45  
46

47  
48 6 projects (Brazil), 4 projects (India, Kenya), 3 projects (Pakistan), 2 projects (Bangladesh,  
49 Guatemala, Peru, Vietnam), 1 project (Colombia, Democratic Republic of Congo, Ethiopia,  
50 Grenada, Jamaica, Nigeria, Rwanda, Zambia, Zimbabwe), 0 projects  
51  
52

53  
54 Note: Total number of countries of implementation >32 as one project implemented in 3  
55 countries  
56  
57  
58  
59  
60



1  
2  
3 Figure 3: Occupation, incentivisation, qualification and retention of frontline workers  
4 amongst Saving Brains portfolio responsive care and early learning (RCEL) projects  
5  
6  
7

8 a) Occupation of frontline worker delivering responsive care and early learning (RCEL)  
9 projects by type of RCEL intervention project. (N=32 projects)  
10  
11

12 No missing data (N=32 projects). Figures on bars represent number of projects.

13 Other'=teaching professionals, social work professionals, personal care workers and  
14 combinations of occupation types.  
15  
16  
17

18  
19 b) Reported level of education / qualification of frontline workers across all responsive care  
20 and early learning (RCEL) projects (N=32 projects)  
21  
22

23 Data reported from Service Delivery Forms which reports on the level of education or  
24 qualifications that front-line workers had (rather than what implementers felt that they  
25 needed). No missing data.  
26  
27  
28

29  
30 c) Incentivisation of front-line workers delivering responsive care and early learning (RCEL)  
31 projects according to cadre of worker (N=25 projects)  
32  
33

34 Total 'n' is greater than number of projects included (N=25) as several projects used more  
35 than one occupation as workers. Piece rate=any irregular payment where pay is per task  
36 rather than fixed salary payment.  
37  
38  
39

40  
41 d) Retention of worker amongst responsive care and early learning (RCEL) projects according  
42 to method of incentivisation (N=29 projects)  
43  
44

45 Data reported from the Results-based Management and Analysis Framework (Web Annex  
46 Table A) reported from each project. Missing data from 3 projects. Piece rate=any irregular  
47 payment where pay is per task rather than fixed salary payment.  
48  
49  
50

51  
52 Figure 4: Method and duration of delivery of intervention curricula amongst Saving Brains  
53 portfolio responsive care and early learning (RCEL) projects  
54  
55

56  
57 a) Method of project delivery: group vs individual by type of RCEL intervention project (N=31  
58 projects)  
59  
60

1  
2  
3 Missing data from 1 project.  
4  
5

6 b) Median duration of project sessions comparing projects delivering curricula in group vs  
7  
8 individual sessions by type of RECL intervention project (N=26 projects)  
9  
10

11 Missing data from 6 projects.  
12  
13

#### 14 **AUTHOR CONTRIBUTIONSHIP STATEMENT**

15  
16  
17 The first draft of the paper was undertaken by CJT, MKL and VPH. Other specific  
18 contributions were made by RB, SB, AB, VC, EG, JH, RH, KM, KMM, JR, SS, KS, and JEL. All  
19 authors reviewed and agreed on the final manuscript.  
20  
21  
22

#### 23 **ACKNOWLEDGEMENTS**

24  
25  
26 We thank all the investigators, participants and researchers involved in projects included in  
27 the Saving Brains portfolio and evaluation. We thank Grand Challenges Canada as funder of  
28 unpublished data. We thank the Expert Advisory Group (Pia Britto, Tarun Dua, EG, Sally  
29 Grantham-McGregor, Melissa Gladstone, JH, RH, KM, JR, Muneera Rasheed, KS, Arjun  
30 Upadhyay) for their guidance; and we are grateful to Claudia da Silva for administrative  
31 assistance.  
32  
33  
34  
35  
36  
37

#### 38 **COMPETING INTERESTS**

39  
40  
41 No competing interests.  
42  
43

#### 44 **FUNDING**

45  
46  
47 This paper has been made possible by funding support from the Bernard van Leer  
48 Foundation. The Saving Brains impact and process evaluation was funded by Grand  
49 Challenges Canada. Grand Challenges Canada is funded by the Government of Canada.  
50  
51  
52

#### 53 **DISCLAIMER**

54  
55  
56 The authors alone are responsible for the views expressed in this article and they do not  
57 necessarily represent the views, decisions or policies of the institution with which they are  
58 affiliated.  
59  
60

**Data sharing**

Supplementary data have been published online and may also be accessed by emailing [cally.tann@lshtm.ac.uk](mailto:cally.tann@lshtm.ac.uk).

For peer review only

## REFERENCES

1. United Nations. Sustainable Development Goals 2015.
2. Every Woman Every Child. The Global Strategy for Women's, Children's and Adolescents' Health (2016-2030). 2015.
3. Daelmans B, Black M, Lombardi J, Lucas J, Richter L, Silver K, et al. Effective interventions and strategies for improving early child development. *BMJ*. 2015;351:h4029.
4. Yousafzai A, Obradović J, Rasheed M, Rizvi A, Portilla X, Tirado-Strayer N, et al. Effects of responsive stimulation and nutrition interventions on children's development and growth at age 4 years in a disadvantaged population in Pakistan: a longitudinal follow-up of a cluster-randomised factorial effectiveness trial. *Lancet Glob Health*. 2016;4(8):e548-e58.
5. Engle P, Black M, Behrman J, Cabral de Mello M, Gertler P, Kapiriri L, et al. Strategies to avoid the loss of developmental potential in more than 200 million children in the developing world. *Lancet*. 2007;369(9557):229-42.
6. Britto P, Lye S, Proulx K, Yousafzai A, Matthews S, Vaivada T, et al. Nurturing care: promoting early childhood development. *Lancet*. 2016;389(10064):91-102.
7. World Health Organisation. Nurturing Care Framework. 2018.
8. Engle P, Fernald L, Alderman H, Behrman J, O'Gara C, Yousafzai A, et al. Strategies for reducing inequalities and improving developmental outcomes for young children in low-income and middle-income countries. *Lancet*. 2011;378(9799):1339-53.
9. Yousafzai A, Rasheed M, Daelmans B, Manji S, Arnold C, Lingam R, et al. Capacity building in the health sector to improve care for child nutrition and development. *Ann N Y Acad Sci*. 2014;1308(1):172-82.
10. Black M, Walker S, Fernald L, Andersen C, DiGirolamo A, Lu C, et al. Early childhood development coming of age: science through the life course. *Lancet*. 2016;389(10064):77-90.
11. Aboud F, Yousafzai A, Nores M. State of the science on implementation research in early child development and future directions. *Ann N Y Acad Sci*. 2018;1419(Special Issue: Implementation Research and Practice for Early Childhood Development):264-71.
12. Yousafzai A, Aboud F. Review of implementation processes for integrated nutrition and psychosocial stimulation interventions. *Ann N Y Acad Sci*. 2014;1308(1):33-45.
13. Neuman M, Kimberly J, Chua P. A Review of the Literature: early childhood care and education (ECCE) personnel in low- and middle-income countries. . Paris: UNESCO; 2015.
14. Aboud F, Yousafzai A. Global health and development in early childhood. *Ann Rev Psychol*. 2015;66:433-57.
15. Frongillo E, Tofail F, Hamadani J, Warren A, Mehrin S. Measures and indicators for assessing impact of interventions integrating nutrition, health, and early childhood development. *Ann N Y Acad Sci*. 2014;1308(1):68-88.
16. Advancing Early Child Development: from Science to Scale. *Lancet*; 2016.
17. Special Issue: Implementation Research and Practice for Early Childhood Development. In: Yousafzai A, Aboud F, Nores M, Britto P, editors. *Annals of the New York Academy of Sciences* 2018.
18. Milner K, Bernal R, Brentani A, Britto P, Dua T, Gladstone M, et al. Contextual design choices and partnerships for scaling early child development programmes. *Arch Dis Child*. 2019;104(Suppl 1):S3-12.
19. Arregoces L, Hughes R, Tann C, Ponce Hardy V, Upadhyay A, Lawn J. Accountability for funds for Nurturing Care: what can we measure? *Arch Dis Child*. 2019;104(Suppl 1):S34-42.
20. Milner K, Bhopal S, Dua T, Gladstone M, Hamadani J, Hughes R, et al. Counting outcomes, coverage and quality for early child development programmes. *Arch Dis Child*. 2019;104(Suppl 1 ):S13-21.
21. Boggs D, Milner K, Chandna J, Black M, Cavallera V, Dua T, et al. Rating early child development outcome measurement tools for routine health programme use. *Arch Dis Child*. 2019;104(Suppl 1):S22-33.
22. Cavallera V, Tomlinson M, Radner J, Coetzee B, Daelmans B, Hughes RC, et al. Scaling early child development: what are the barriers and enablers? *Arch Dis Child*. 2019;104(Suppl 1):43-50.
23. Radner J, Ferrer M, McMahon D, Shankar A, Silver K. Practical considerations for transitioning early childhood interventions to scale: lessons from the Saving Brains portfolio. *Ann N Y Acad Sci*. 2018;1419(Special issue: Implementation Research and Practice for Early Childhood Development):230-48.
24. Milner K, Kohli-Lynch M, Tann C, Lawn J, On behalf of the Expert Advisory Group and Saving Brains Platform. *Saving Brains Portfolio Impact and Process Evaluation Report*. London, United Kingdom: London School of Hygiene & Tropical Medicine; 2016.

- 1  
2  
3 25. Moore GF, Audrey S, Barker M, Bond L, Bonell C, Hardeman W, et al. Process evaluation of complex  
4 interventions: Medical Research Council guidance. *BMJ : British Medical Journal*. 2015;350.  
5 26. International Standard Classification of Occupations. ISCO-08. Geneva: International Labour Office;  
6 2012.  
7 27. Hamadani J, Mehrin S, Tofail F, Hazan M, Huda S, Baker-Henningham H, et al. Integrating an early  
8 childhood development programme into the Bangladeshi Primary Health Care Services: A cluster randomised  
9 trial. *Lancet Glob Health*. 2018.  
10 28. Hamadani J, Nahar B, Huda S, Tofail F. Integrating early child development programs into health and  
11 nutrition services in Bangladesh: benefits and challenges. *Ann N Y Acad Sci*. 2014;1308(1):192-203.  
12 29. Attanasio O, Baker-Henningham H, Bernal R, Meghir C, Pineda D, Rubio-Codina M. Early Stimulation  
13 and Nutrition: the impacts of a scalable intervention. NBER Working Paper. 2018(25059).  
14 30. Bajaj M, Sharma S. Scaling-up early childhood centres for migrant construction workers' children in  
15 India. *Early Childhood Matters*. 2016;125:74-9.  
16 31. Lawn J, Bhutta Z, Wall S, Ptereson S, Daviaud E. Cadres, content and costs for community-based care  
17 for mothers and newborns from seven countries: implications for universal health coverage. *Health Policy*  
18 *Plan*. 2017;32(Special Issue (Community-based maternal & newborn care economic analysis: Multi-country  
19 analysis of costs and health systems with implications for scale up)):i1-i5.  
20 32. Daviaud E, Owen H, Pitt C, Kerber KJ, Bianchi Jassir F, Barger D, et al. Overview, methods and results  
21 of multi-country community-based maternal and newborn care economic analysis. *Health Policy Plan*.  
22 2017;32(Special Issue (Community-based maternal & newborn care economic analysis: Multi-country analysis  
23 fo costs and health syystems with implications for scale up)):i6-i20.  
24 33. Mendenhall E, de Silva M, Hanlon C, Petersen I, Shidhaye R, Jordans M, et al. Acceptability and  
25 feasibility of using non-specialist health workers to deliver mental health care: Stakeholders perceptions from  
26 the PRIME district sites in Ethiopia, India, Nepal, South Africa, and Uganda. *Soc Sci Med*. 2014;118:33-42.  
27 34. Tomlinson M, Hunt X, Rotheram-Borus M. Diffusing and scaling evidence-based interventions: eight  
28 lessons for early child development from the implementation of perinatal home visiting in South Africa. *Annals*  
29 *of the New York Academy of Sciences*. 2018;1419(Special Issue: Implementation Research and Practice for  
30 Early Childhood Development):218-29.  
31 35. Black R, Taylor C, Arole S, Bang A, Bhutta Z, Chowdhury A, et al. Comprehensive review of the  
32 evidence regarding the effectiveness of community-based primary health care in improving maternal, neonatal  
33 and child health: 8. summary and recommendations of the Expert Panel. *J Glob Health*. 2017;7(1):010908.  
34 36. Daviaud E, Nkonki L, Ijumba P, Doherty T, Lawn J, Owen H, et al. South-Africa (Goodstart III) trial:  
35 community-based maternal and newborn care economic analysis. *Health Policy Plan*. 2017;32(Special Issue  
36 (Community-based maternal & newborn care economic analysis: Multi-country analysis of costs and health  
37 systems with implications for scale up)):i53-i63.  
38 37. Reichow B, Servili C, Taghi Yasamy M, Barbui C, Saxena S. Non-Specialist Psychosocial Interventions  
39 for Children and Adolescents with Intellectual Disability or Lower-Functioning Autism Spectrum Disorders: A  
40 Systematic Review. *PLoS Med*. 2013;10(12):e1001572.  
41 38. Andrew A, Attanasio O, Fitzsimons E, Grantham-McGregor S, Meghir C, Rubio-Codina M. Impacts 2  
42 years after a scalable early childhood development intervention to increase psychosocial stimulation in the  
43 home: A follow-up of a cluster randomized controlled trial in Colombia. *PLoS Med*. 2018;15(4).  
44 39. Lund C, Tomlinson M, de Silva M, Fekadu A, Shidhaye R, Jordans M, et al. PRIME: A Programme to  
45 Reduce the Treatment Gap for Mental Disorders in Five Low- and Middle-Income Countries. *PLOS One*.  
46 2012;9(12).  
47 40. Early Childhood Workforce Initiative 2019 [Available from:  
48 <https://www.earlychildhoodworkforce.org/>].  
49 41. Mitter R, Putcha V. Strengthening and Supporting the Early Childhood Workforce: Training and  
50 professional development. Washington DC: Results for Development; 2018.  
51 42. World Health Organisation. Nutrition - Infant and young child feeding 2019 [cited 2019. Available  
52 from: [https://www.who.int/nutrition/publications/infant\\_feeding/en/](https://www.who.int/nutrition/publications/infant_feeding/en/)].  
53 43. World Health Organisation. Mental Health 2019 [cited 2019. Available from:  
54 [https://www.who.int/mental\\_health/en/](https://www.who.int/mental_health/en/)].  
55 44. Yousafzai A, Rasheed M, Siyal S. Integration of parenting and nutrition interventions in a community  
56 health program in Pakistan: an implementation evaluation. *Ann N Y Acad Sci*. 2018;1419(Special Issue:  
57 Implementation Research and Practice for Early Childhood Development):160-78.  
58 45. Yousafzai A, Lynch P, Gladstone M. Moving beyond prevalence studies: screening and interventions  
59 for children with disabilities in low-income and middle-income countries. *Arch Dis Child*. 2014;99(9):840-8.  
60

- 1  
2  
3 46. Kuper H, Smythe T, Duttine A. Reflections on Health Promotion and Disability in Low and Middle-  
4 Income Countries: Case Study of Parent-Support Programmes for Children with Congenital Zika Syndrome. *Int J*  
5 *Environ Res Public Health*. 2018;15(3).  
6 47. Zuurmond M, Nyanta G, Baltussen M, Seeley J, Abanga J, Shakespeare T, et al. A support programme  
7 for caregivers of children with disabilities in Ghana: Understanding the impact on the wellbeing of caregivers.  
8 *Child Care Health Dev*. 2018;45(1):45-53.  
9 48. Benfer K, Novak I, Morgan C, Whittingham K, Khan N, Ware R, et al. Community-based parent-  
10 delivered early detection and intervention programme for infants at high risk of cerebral palsy in a low-  
11 resource country (Learning through Everyday Activities with Parents (LEAP-CP): protocol for a randomised  
12 controlled trial. *BMJ Open*. 2018;8.  
13 49. ISRCTN Current Controlled Trials [Internet]. Improving early detection and intervention for young  
14 infants at high risk of neurodevelopmental delay and disability in Uganda London: BioMed Central; 2018 Nov  
15 22 [cited 2018 Dec 12]. Available from: <http://www.isrctn.com/ISRCTN44380971>.  
16 50. Rockers P, Barnighausen T. Interventions for hiring, retaining and training district health systems  
17 managers in low- and middle-income countries. *Cochrane Database Syst Rev*. 2013;4:CD009035.  
18 51. Smith J, Baker-Henningham H, Brentani A, Mugweni R, Walker S. Implementation of Reach Up early  
19 childhood parenting program: acceptability, appropriateness, and feasibility in Brazil and Zimbabwe. *Ann N Y*  
20 *Acad Sci*. 2018;1419(Special Issue: Implementation Research and Practice for Early Childhood Development):1-  
21 21.  
22  
23  
24  
25  
26  
27  
28  
29  
30  
31  
32  
33  
34  
35  
36  
37  
38  
39  
40  
41  
42  
43  
44  
45  
46  
47  
48  
49  
50  
51  
52  
53  
54  
55  
56  
57  
58  
59  
60

Figure 1: Project inclusion flow chart: inclusions and subsets of responsive care and early learning projects from the Saving Brains portfolio (n=39)

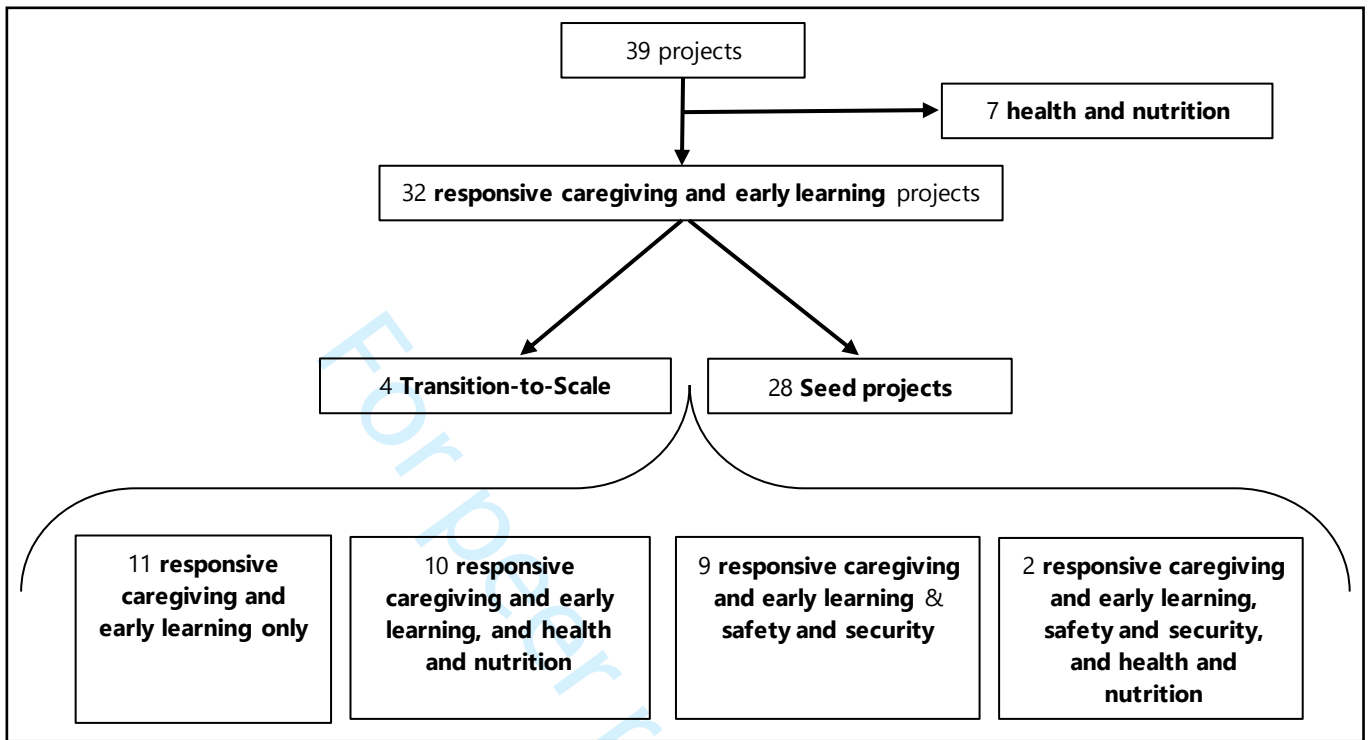

1  
2  
3  
4  
5  
6  
7  
8  
9  
10  
11  
12  
13  
14  
15  
16  
17  
18  
19  
20  
21  
22  
23  
24  
25  
26  
27  
28  
29  
30  
31  
32  
33  
34  
35  
36  
37  
38  
39  
40  
41  
42  
43  
44  
45  
46  
47  
48  
49  
50  
51  
52  
53  
54  
55  
56  
57  
58  
59  
60

**Figure 2: Project implementation countries**

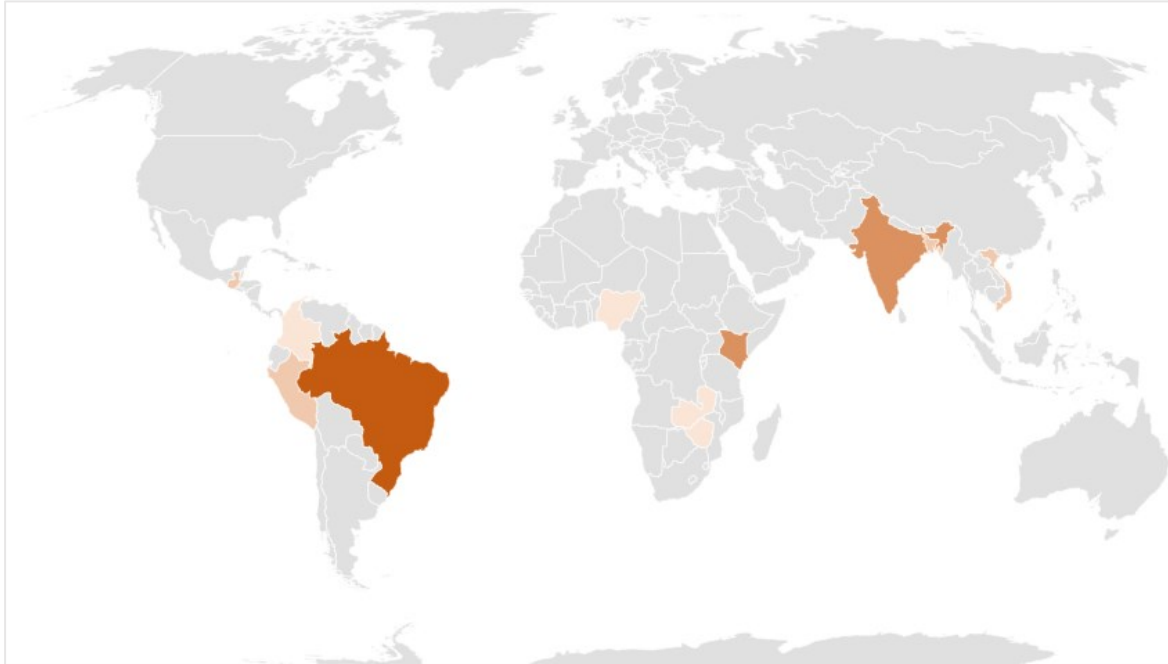

- 6 projects (Brazil)
- 4 projects (India, Kenya)
- 3 projects (Pakistan)
- 2 projects (Bangladesh, Guatemala, Peru, Vietnam)
- 1 project (Colombia, Democratic Republic of Congo, Ethiopia, Grenada, Jamaica, Nigeria, Rwanda, Zambia, Zimbabwe)
- 0 projects

Note: Total number of countries of implementation >32 as one project implemented in 3 countries



**Figure 3: Occupation, incentivisation, qualification and retention of frontline workers amongst Saving Brains portfolio responsive care and early learning (RCEL) projects**

a) Occupation of frontline worker delivering responsive care and early learning (RCEL) projects by type of RCEL intervention project. (N=32 projects)

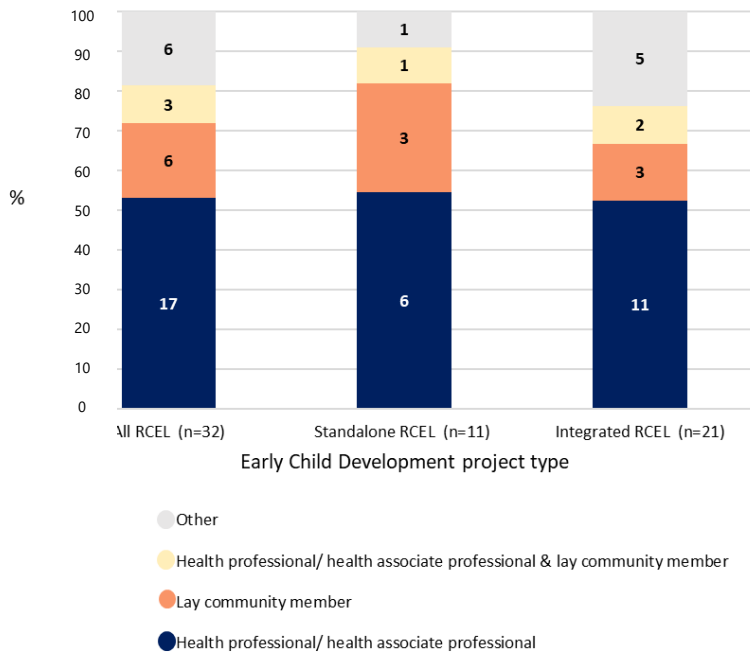

b) Reported level of education / qualification of frontline workers across all responsive care and early learning (RCEL) projects (N=32 projects)

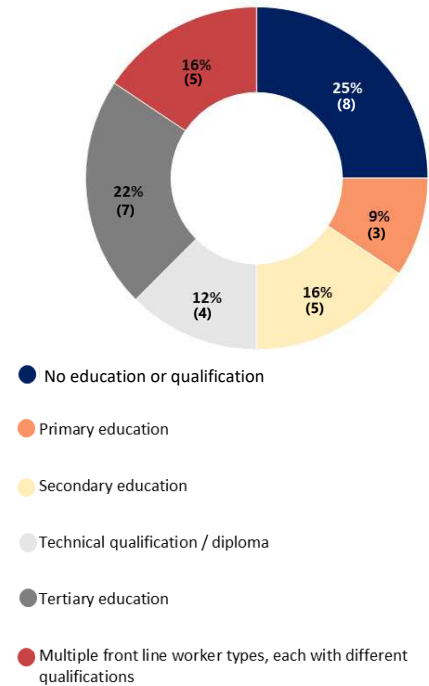

No missing data (N=32 projects). Figures on bars represent number of projects. 'Other'=teaching professionals, social work professionals, personal care workers and combinations of occupation types.

Data reported from Service Delivery Forms which reports on the level of education or qualifications that front-line workers had (rather than what implementers felt that they needed). No missing data.

c) Incentivisation of front-line workers delivering responsive care and early learning (RCEL) projects according to cadre of worker (N=25 projects)

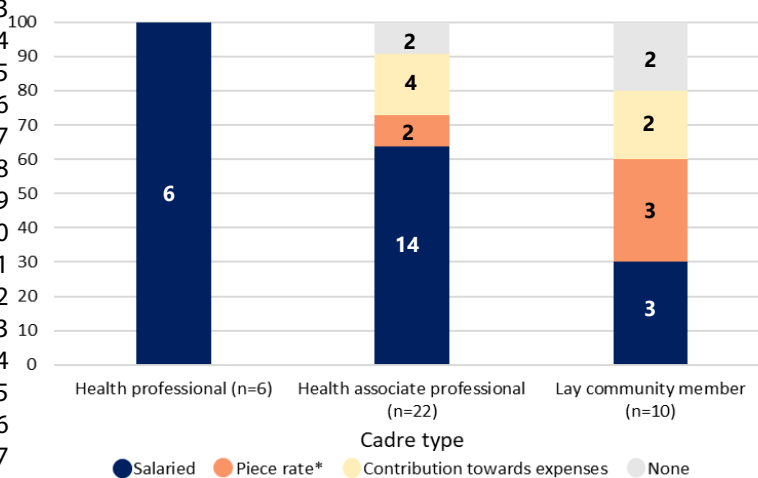

d) Retention of worker amongst responsive care and early learning (RCEL) projects according to method of incentivisation (N=29 projects)

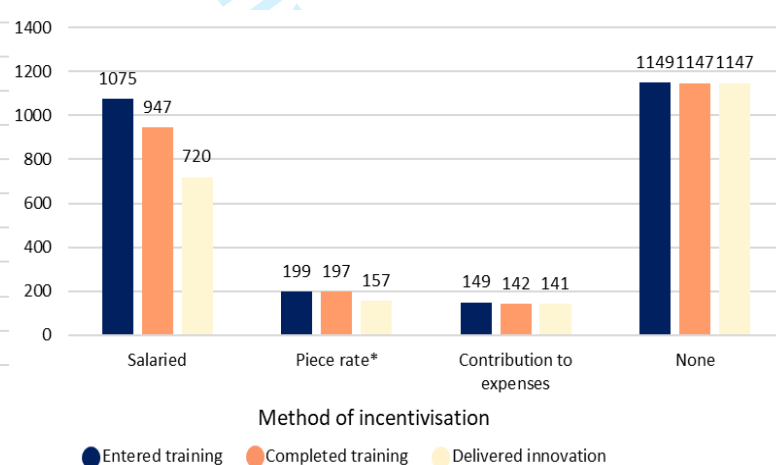

Total 'n' is greater than number of projects included (N=25) as several projects used more than one occupation as workers. Piece rate=any irregular payment where pay is per task rather than fixed salary payment.

Data reported from the Results-based Management and Analysis Framework (Web Annex Table A) reported from each project. Missing data from 3 projects. Piece rate=any irregular payment where pay is per task rather than fixed salary payment.

Figure 4: Method and duration of delivery of intervention curricula amongst Saving Brains portfolio responsive care and early learning (RCEL) projects

a) Method of project delivery: group vs individual by type of RCEL intervention project (N=31 projects)

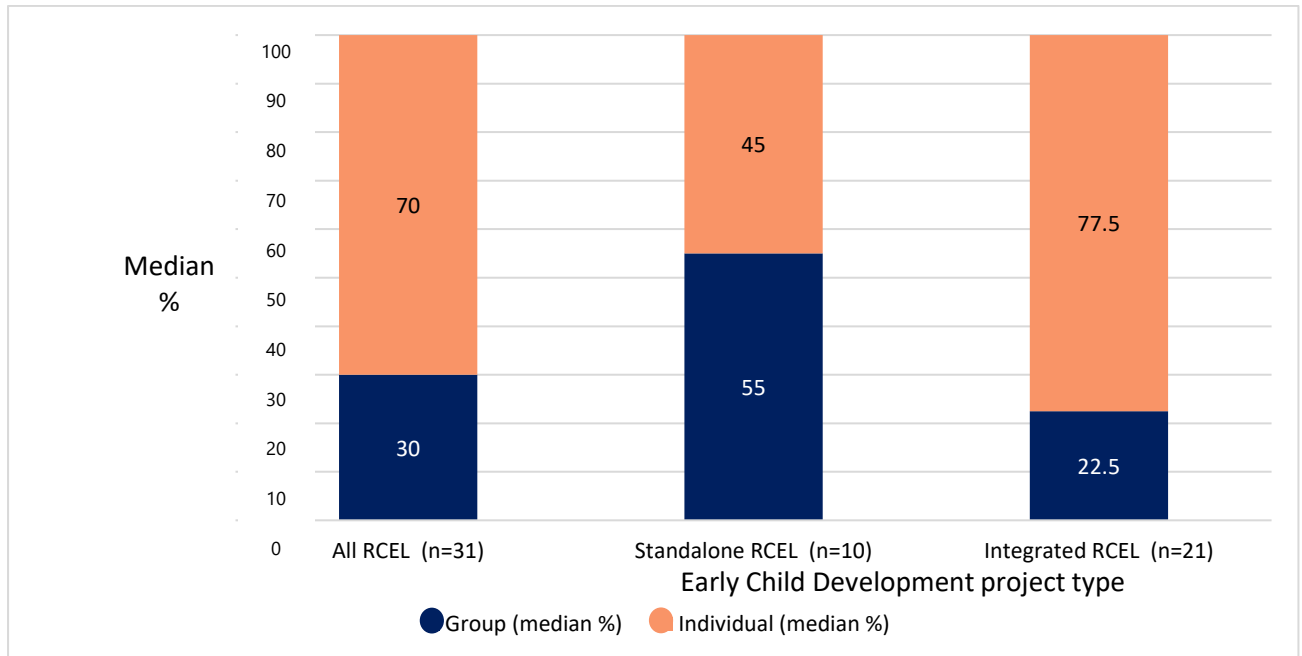

Missing data from 1 project.

b) Median duration of project sessions comparing projects delivering curricula in group vs individual sessions by type of RECL intervention project (N=26 projects)

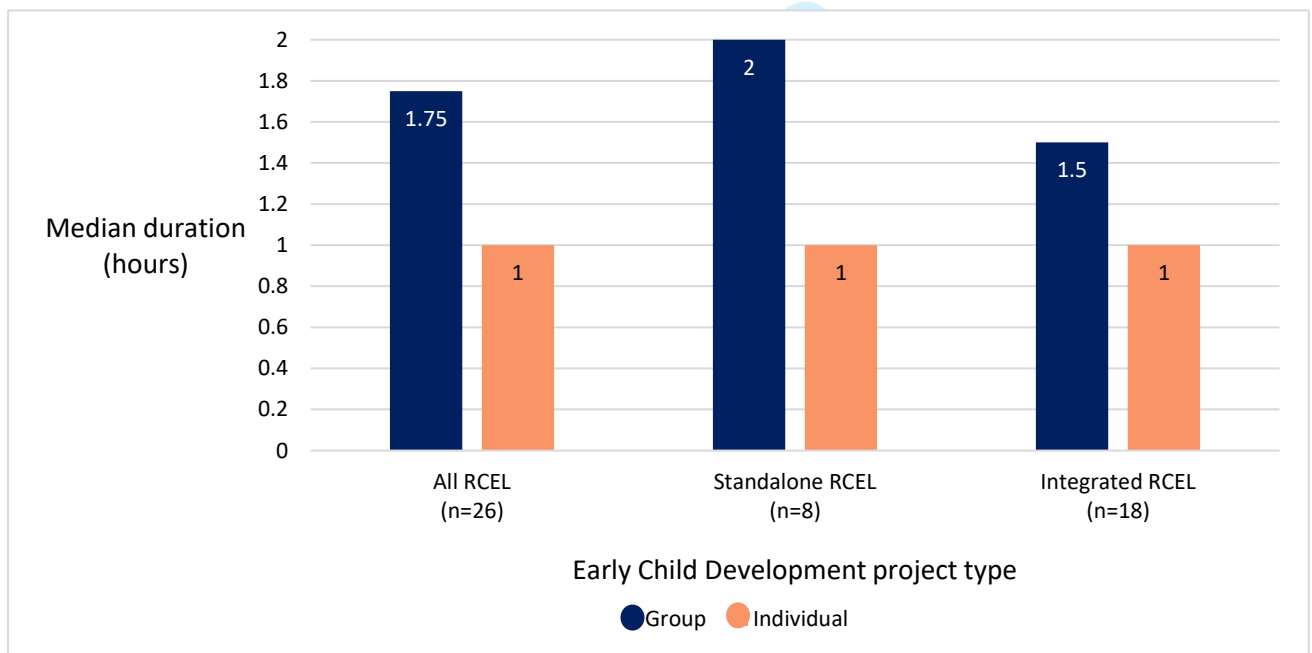

Missing data from 6 projects.

Web Appendix Figure A: Portfolio Conceptual Evaluation Framework

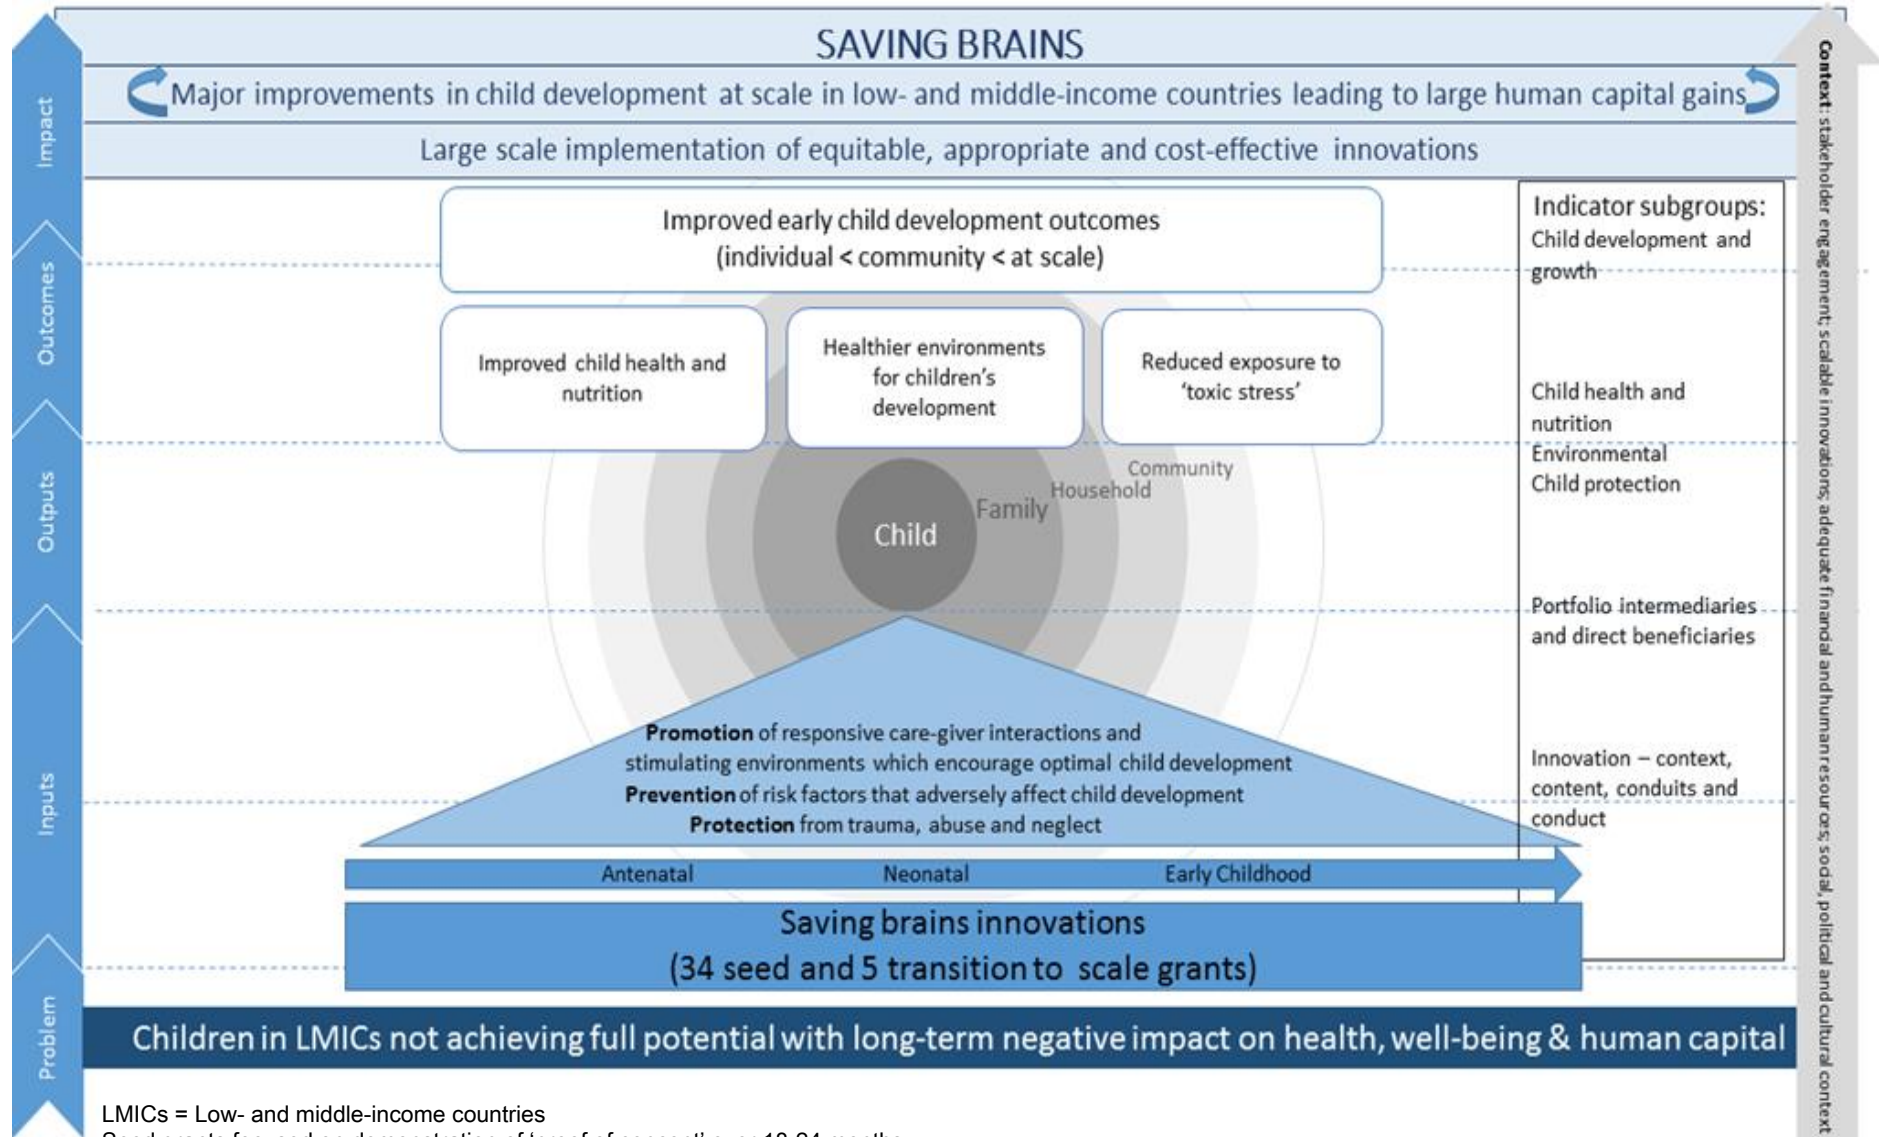

LMICs = Low- and middle-income countries

Seed grants focused on demonstration of 'proof of concept' over 18-24 months.

Transition to scale grants focused on progression towards scale in partnership with other organisations over 3 years.

Web Appendix Figure B: Saving Brains portfolio level Theory of Change

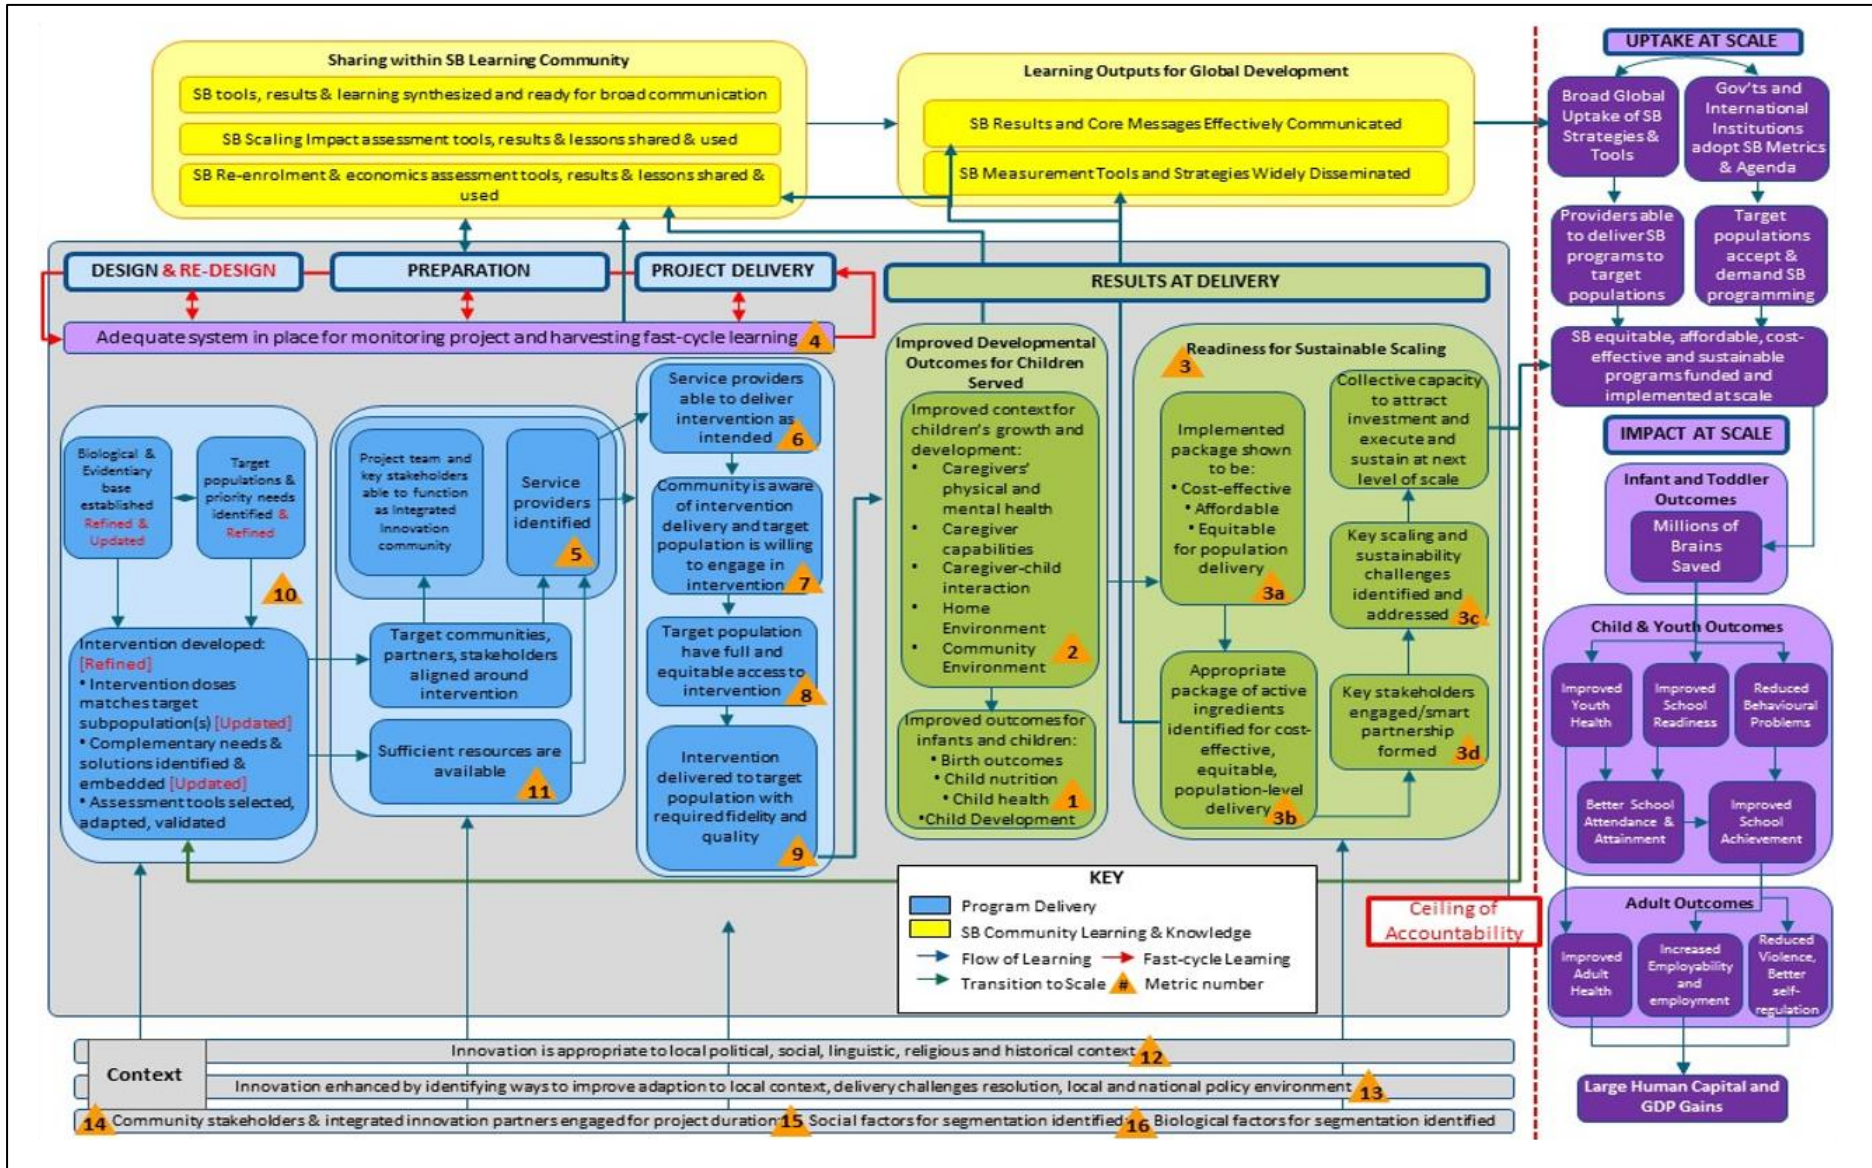

SB=Saving Brains

Note: Theory of Change was developed by Grand Challenges Canada Saving Brains platform members [about/guidelines.xhtml](https://www.gccanada.ca/saving-brains/about/guidelines.xhtml)

Web Appendix Table A: Data sources utilised for the Saving Brains portfolio evaluation

| Data Source                                                         | Description                                                                                                                                                                                             | Timing of data collection                                                                  | Organisation receiving data                                              | Data type                  | Number of data source items             |
|---------------------------------------------------------------------|---------------------------------------------------------------------------------------------------------------------------------------------------------------------------------------------------------|--------------------------------------------------------------------------------------------|--------------------------------------------------------------------------|----------------------------|-----------------------------------------|
| <b>Service delivery forms</b>                                       | Document completed by grantees used to collect projected, interim and/or final and quantitative information on workforce and intervention delivery                                                      | Yearly                                                                                     | Grand Challenges Canada                                                  | Quantitative & Qualitative | 32<br>(Endpoint service delivery forms) |
| <b>Results-based Management and Accountability Framework (RMAF)</b> | Framework completed by grantee which facilitates the collection of data and comparison of results around core metrics                                                                                   | Six-monthly                                                                                | Grand Challenges Canada                                                  | Quantitative & Qualitative | 7                                       |
| <b>RMAF+</b>                                                        | Framework completed by grantee developed from the original RMAF and Theory of Change containing more detailed metrics on impact, process and context of innovations (Round 3 onwards)                   | Six-monthly                                                                                | Grand Challenges Canada                                                  | Quantitative & Qualitative | 25                                      |
| <b>Progress reports</b>                                             | Narrative reports completed by grantees detailing project progression, challenges, lessons learned, results, dissemination and next steps                                                               | Six-monthly                                                                                | Grand Challenges Canada                                                  | Qualitative                | 32                                      |
| <b>Research proposals</b>                                           | Proposal of innovation design completed by potential grantees                                                                                                                                           | Point of application for grant                                                             | Grand Challenges Canada                                                  | Qualitative                | 32                                      |
| <b>Saving Brains community meeting transcripts</b>                  | Transcripts from discussions between grantees and platform members at two Saving Brains community meetings                                                                                              | 21 <sup>st</sup> -22 <sup>nd</sup> Jun 2016<br>25 <sup>th</sup> -26 <sup>th</sup> Oct 2016 | London School of Hygiene & Tropical Medicine                             | Qualitative                | 2                                       |
| <b>Key informant interviews</b>                                     | Key informants, including Saving Brains project leads, identified through professional networks and approached for interview on relevant themes                                                         | Jun-Oct 2016                                                                               | World Health Organization & London School of Hygiene & Tropical Medicine | Qualitative                | 19                                      |
| <b>Grantee interviews</b>                                           | Grantees identified by LSHTM and platform members for thematic discussion                                                                                                                               | Jul-Sept 2016                                                                              | London School of Hygiene & Tropical Medicine<br>Qualitative              | Qualitative                | 21                                      |
| <b>Focus group discussions</b>                                      | Grantees selected and invited to focus group discussions, either online or during Saving Brains community meetings, on workforce choices, supervision and training, and monitoring quality and coverage | Jun-Oct 2016                                                                               | London School of Hygiene & Tropical Medicine                             | Qualitative                | 13<br><br>(4-10 participants per FGD)   |

Web Appendix Table B: Interview and focus group topic guides from Saving Brains evaluation

| <b>Thematic questions for key informant interviews and focus groups (Toronto Saving Brains Community Meeting (June 21-22 2016) and webinars (August 17, 24 and September 2 2016)).</b> |                                                                                                                                                                                                                                                                                                                                                                                                                                                                                                                                                                                                                                                                                                                                                                                                                                                                                                                                                                                                                                                                                                                                                                                                                                                                                                                                 |
|----------------------------------------------------------------------------------------------------------------------------------------------------------------------------------------|---------------------------------------------------------------------------------------------------------------------------------------------------------------------------------------------------------------------------------------------------------------------------------------------------------------------------------------------------------------------------------------------------------------------------------------------------------------------------------------------------------------------------------------------------------------------------------------------------------------------------------------------------------------------------------------------------------------------------------------------------------------------------------------------------------------------------------------------------------------------------------------------------------------------------------------------------------------------------------------------------------------------------------------------------------------------------------------------------------------------------------------------------------------------------------------------------------------------------------------------------------------------------------------------------------------------------------|
| <b>Impact and outcome metrics question guide</b>                                                                                                                                       |                                                                                                                                                                                                                                                                                                                                                                                                                                                                                                                                                                                                                                                                                                                                                                                                                                                                                                                                                                                                                                                                                                                                                                                                                                                                                                                                 |
| <b>Background</b>                                                                                                                                                                      | Limitations of child development metrics pose a major challenge in policy and programming efforts to improve early child development outcomes in LMIC settings. Various initiatives are underway to improve measurement of outcomes at population and individual level (e.g. newly published data from McCoy DC et al, funded by the Saving Brains Programme, Grand Challenges Canada, providing the first global and regional estimates of the number of children failing to reach developmental milestones based on parent report measures. <sup>1</sup> However major challenges remain and collaboration is required to improve measurement of impact of interventions on child development outcomes at scale in low-resources settings.                                                                                                                                                                                                                                                                                                                                                                                                                                                                                                                                                                                    |
| <b>Objectives</b>                                                                                                                                                                      | To discuss as a group; <ol style="list-style-type: none"> <li>1. Different approaches to impact measurement that have been taken across the Saving Brains portfolio</li> <li>2. Challenges and benefits of different approaches taken</li> <li>3. Lessons learned for policy makers and programmers attempting to measure impact of ECD interventions at scale</li> </ol>                                                                                                                                                                                                                                                                                                                                                                                                                                                                                                                                                                                                                                                                                                                                                                                                                                                                                                                                                       |
| <b>Questions</b>                                                                                                                                                                       | <ol style="list-style-type: none"> <li>1. How has impact been measured across the Saving Brains portfolio?</li> <li>2. How were decisions reached about impact measures used? What factors influenced these decisions?</li> <li>3. How has use of these impact measures worked in practice?</li> <li>4. How about intermediary outcome measurement in terms of environment, caregiver relationships etc.?</li> <li>5. What have been the programming requirements to support this in terms of human resources, cost, timeline etc.?</li> <li>6. Have measures used required translation and adaptation in your local context and if so, how has this been managed?</li> <li>7. Do measures used include children less than 3 years and children with disabilities?</li> <li>8. Could measures used within the Saving Brains portfolio be used if innovations were scaled up at National level? If so, how and what would be required to support this? If not, what alternatives would you recommend for programmers and policy makers?</li> <li>9. Given the range of players involved, how can coordination within ECD networks be improved to support development of improved metrics?</li> <li>10. Any other aspects of impact measurement that you think are important considerations which we have not covered?</li> </ol> |
| <b>Cadre question guide</b>                                                                                                                                                            |                                                                                                                                                                                                                                                                                                                                                                                                                                                                                                                                                                                                                                                                                                                                                                                                                                                                                                                                                                                                                                                                                                                                                                                                                                                                                                                                 |
| <b>Background</b>                                                                                                                                                                      | Choices around human resources for implementation of ECD interventions have significant implications for effectiveness, sustainability and scale-up. Across the Savings Brains portfolio, a broad range of workers have been used to implement innovations with potential lessons for policy makers and programmers aiming to implement ECD interventions at scale in a range of contexts.                                                                                                                                                                                                                                                                                                                                                                                                                                                                                                                                                                                                                                                                                                                                                                                                                                                                                                                                      |
| <b>Objectives</b>                                                                                                                                                                      | <ol style="list-style-type: none"> <li>1. To discuss the range of workers used to implement innovations across settings.</li> <li>2. To discuss rationale for choice of workers used across settings.</li> <li>3. To discuss programming implications with use of different cadres of workers.</li> </ol>                                                                                                                                                                                                                                                                                                                                                                                                                                                                                                                                                                                                                                                                                                                                                                                                                                                                                                                                                                                                                       |
| <b>Questions</b>                                                                                                                                                                       | <ol style="list-style-type: none"> <li>1. What was the rationale for selection of worker type across different SB innovations?</li> </ol>                                                                                                                                                                                                                                                                                                                                                                                                                                                                                                                                                                                                                                                                                                                                                                                                                                                                                                                                                                                                                                                                                                                                                                                       |

**Thematic questions for key informant interviews and focus groups (Toronto Saving Brains Community Meeting (June 21-22 2016) and webinars (August 17, 24 and September 2 2016)).**

2. What challenges and benefits were noted with use of various cadres of workers across settings?
3. Where pre-existing categories of workers were used, what were the pros and cons experienced? How was the overall workload for individual workers managed when implementing 'additional' ECD intervention?
4. Where new worker groups were used, what were the pros and cons of this approach? How were issues of financing, governance and sustainability managed?
5. How were decisions around incentivisation reached?
6. Where community health workers were used, how were decisions reached around type of community health worker, level of training, supervision, equipment and incentivisation?
7. Where community health workers were used with the goal of improving equity and coverage of interventions, were these tracked? And if so, provisional recommendations or findings?
8. When thinking about decisions at a national scale, are there additional factors that need to be considered about human resources for implementation of ECD interventions?

**Content (positive stimulation interventions) question guide**

**Background**

Available evidence provides general guidance to policy makers and programmers about elements of positive stimulation interventions associated with increased effectiveness.<sup>2</sup> In particular, use of a structured evidence based curriculum, provision of opportunity to practice skills with the child, provision of feedback to the parent, adequate training and supervision for staff, integrated health, nutrition and ECD elements and both community and government support are thought to be important in intervention effectiveness.<sup>2</sup> There are also an increasing range of resources available to programmers implementing ECD interventions.<sup>3, 4</sup> However, from a practical perspective programmers still face detailed choices about intervention design and pros and cons of alternate choices in different settings may not be clear.

**Objectives**

1. To consider key intervention design questions raised when implementing positive stimulation interventions across the SB portfolio.
2. To consider how choices were made around these intervention design elements.
3. To consider relevance of lessons learned to programmers developing models for ECD interventions at national scale.

**Questions**

1. Across the SB portfolio what factors have informed choices about the following elements of positive stimulation interventions;
2. Target of intervention (e.g. parent, parent and child, child only)
3. Age of children
4. Number of contacts
5. Frequency of contacts
6. Duration of contacts
7. Chosen curriculum (with as much detail re actual curriculum as possible)
8. With regards to choices made, what has worked well and why?
9. Are there areas which have not worked well and if so, please describe?
10. Are there design elements that need to change to enable scale up and if so, please provide examples?
11. Any other elements that you consider important for programmers at national level to consider when developing models for implementation at scale?

NB *That questions re universal vs targeted and integration of interventions are asked elsewhere but could also be covered here.*

**Delivery setting question guide**

**Background**

**Thematic questions for key informant interviews and focus groups (Toronto Saving Brains Community Meeting (June 21-22 2016) and webinars (August 17, 24 and September 2 2016)).**

ECD interventions are delivered in diverse settings in terms of geography, rural/urban, different sectors, facility/communities or home or often a mix of settings.

Decisions about setting have implications for policy and on many aspects of programming.

**Objectives**

To discuss as a group;

1. How decisions about implementation setting were made across the portfolio
2. Implications of those decisions, both positive and negative on program implementation and scale-up
3. Lessons learned for policy makers and programmers designing ECD programmes at national

**Questions**

1. How were decisions about the setting for implementation of your ECD programme reached (e.g. convenience, targeting of vulnerable subgroup, prior involvement with that sector etc.)?
2. What information did you use in deciding about the setting of implementation for your program?
3. Was there any information that if you'd had it earlier, would have altered your decision about setting?
4. Benefits specific to your setting?
5. Challenges specific to your setting?
6. What implications has setting choice had on the ease of program implementation?
7. What recommendations about delivery setting would you make to policy makers and programmers designing ECD programmes at national scale?
8. Anything further that you would like to highlight about implementation setting that we have not covered so far?

**Universal and targeted approaches**

**Background**

Universal approaches to improving ECD aim to increase protective factors and reduced risks for adverse child development at a whole population level. Targeted approaches are aimed specifically at children identified as having a higher-than-population-baseline risk of adverse developmental outcomes.

While systems which provide both universal and targeted ECD interventions are ideal, in resource limited settings, some have suggested that services should initially be targeted to the most vulnerable.<sup>5</sup> Further, from a rights perspective, it can be argued that ensuring equity through inclusion of children with specific additional risk factors (e.g. disability, membership to ethnic minority subgroups etc.) is a priority, regardless of setting.

There are however many challenges. While effectiveness of interventions may be greatest for certain vulnerable population sub-groups, with potentially favourable 'benefit to cost ratio' for investment, scaling up services to include those 'hardest to reach' may involve higher initial costs.<sup>2</sup> These complexities pose challenges for policy makers trying to develop ECD programmes which are equitable but also provide sustainable coverage at scale.

**Objectives**

To discuss as a group;

1. The rationale for selection of targeted versus universal approaches to ECD implementation in different settings within the SB portfolio.
2. Programming implications for both approaches
3. Requirements to inform policy makers in decisions about either universal or targeted approach to implementation

**Questions**

1. What was the rationale for selection of targeted versus universal approaches to ECD implementation in your context?
2. In interventions where a targeted approach was taken, how was the target population



**Thematic questions for key informant interviews and focus groups (Toronto Saving Brains Community Meeting (June 21-22 2016) and webinars (August 17, 24 and September 2 2016)).**

identified (e.g. data driven, empirically, opportunistically)?

3. What are the benefits and disadvantages of a targeted approach in different settings?
4. What are the benefits and disadvantages of a universal approach in different settings?
5. What have been the programming implications of different approaches taken (e.g. human resources, training and supervision, financial)?
6. Have there been implications for financial sustainability and if so, moving forward, what strategies might be used to address these?
7. For interventions taking a universal approach, what strategies have been implemented to ensure inclusion of disadvantaged population subgroups including children with disabilities?
8. What recommendations about intervention targeting would you make to policy makers and programmers designing ECD programmes at national scale?
9. Anything further that you would like to highlight about implementation setting that we have not covered so far?

**Processes for monitoring coverage and quality at scale**

**Background**

Processes to ensure quality and coverage are important for effective and equitable implementation of ECD interventions.<sup>2</sup> However, review by Yousafzai et al has highlighted the need for further consideration of implementation processes to facilitate more comprehensive guidance as to how to effectively implement interventions.<sup>6, 7</sup> The SB portfolio provides a unique opportunity to consider implementation processes in order to provide more detailed guidance for programming at scale.

**Objectives**

To discuss:

1. Priorities in measuring quality and coverage of intervention.
2. Approaches used to monitor quality and coverage across the portfolio.
3. Considerations for monitoring coverage and quality of ECD interventions at scale.

**Questions**

1. What do you think are the 3 most important elements of 'quality' of implementation to measure?
2. What indicators have been most helpful in measuring these?
3. What processes of supervision and training have been developed to support this? (As much detail as possible re number of supervisors per worker, frequency, duration and mode of supervision)
4. What has been required to support monitoring of quality and coverage in terms of;
5. Data sources - are these procedures integrated into existing national data collection systems or stand-alone systems?
6. Technical and funding support?
7. Incentivisation of workers?
8. How have findings from monitoring been incorporated into ongoing implementation?
9. Would these approaches to monitoring of quality be feasible and appropriate for interventions delivered at national scale?
10. What strategies have been used to ensure equitable coverage of interventions?
11. What strategies have been used to reach the most difficult to reach populations including children with disabilities?
12. What challenges have been faced with regard to retention of participants? How have these challenges been overcome?
13. How would these approaches need modified for implementation at national scale?

**Integration**

**Background**

Integrated delivery of ECD with interventions in other sectors is often recommended to promote holistic care of children and their families, to maximise synergies of interventions and for efficiency.

**Thematic questions for key informant interviews and focus groups (Toronto Saving Brains Community Meeting (June 21-22 2016) and webinars (August 17, 24 and September 2 2016)).**

However, an integrated approach to service delivery also has many implications for programming.

**Objectives**

To consider as a group;

1. Experience with integrated innovations across the SB portfolio in terms.

**Questions**

1. What has been the rationale for choosing ECD specific or integrated ECD approaches in different settings across the portfolio?
2. Where integrated approaches have been taken, how has this worked?
3. What have been the programmatic implications of an integrated approach in terms of;
4. Work-load for workers?
5. Training and supervision?
6. Equipment?
7. Cost?
8. Monitoring and evaluation?
9. How has governance across sectors been managed?
10. What are the implications of an integrated approach for implementation at national scale?
11. Are there other elements of an integrated approach which are important to consider in implementation of ECD programmes at national scale?

**Questions for experts in the field**

1. What do you consider to be priority needs for policy makers and programmers in implementing ECD programming at national scale, once a decision has been made to invest in early child development?
2. With regards to ECD programmes at scale, what do you consider to be the key design decisions for policy makers and programmers?
3. Given the challenges of measuring impact in ECD programmes and the constraints that this poses to progress in policy and planning, what do you see as next steps in improving developmental outcome metrics within programmes and at national scale?
4. If it were possible to monitor 3 indicators on the pathway to improving ECD at a national level, what would you measure and why?
5. What key lessons can be learned about cadres of worker for delivery of ECD interventions from other global child health interventions? In particular, what lessons around use of CHWs are relevant for CHW delivery of positive stimulation interventions in home settings?

1  
2  
3  
4  
5  
6  
7  
8  
9  
10  
11  
12  
13  
14  
15  
16  
17  
18  
19  
20  
21  
22  
23  
24  
25  
26  
27  
28  
29  
30  
31  
32  
33  
34  
35  
36  
37  
38  
39  
40  
41  
42  
43  
44  
45  
46  
47  
48  
49  
50  
51  
52  
53  
54  
55  
56  
57  
58  
59  
60

For peer review only

Web Appendix Table C: Key informants contributing to qualitative components of portfolio evaluation

|                                                                                                                                                                                                                                                   | Organisation Type/Name                                       | Position                        | Question theme                                                                       |
|---------------------------------------------------------------------------------------------------------------------------------------------------------------------------------------------------------------------------------------------------|--------------------------------------------------------------|---------------------------------|--------------------------------------------------------------------------------------|
| <b>ECD POLICY AND PROGRAMMING</b>                                                                                                                                                                                                                 |                                                              |                                 |                                                                                      |
| 1                                                                                                                                                                                                                                                 | Saving Brains                                                | Executive                       | ECD research, policy and programming; contemporary challenges and future directions. |
| 2.                                                                                                                                                                                                                                                | Multilateral UN organisation                                 | Policy and programming.         | ECD research, policy and programming; contemporary challenges and future directions. |
| 3.                                                                                                                                                                                                                                                | Multilateral UN organisation                                 | Policy and programming.         | ECD research, policy and programming; contemporary challenges and future directions. |
| 4.                                                                                                                                                                                                                                                | Private international ECD foundation                         | Policy maker.                   | ECD research, policy and programming; contemporary challenges and future directions. |
| 5.                                                                                                                                                                                                                                                | International Financial Institution.                         | Policy maker.                   | ECD research, policy and programming; contemporary challenges and future directions. |
| 6.                                                                                                                                                                                                                                                | Multilateral non-government organisation.                    | Policy & programming.           | ECD programming, iNGO perspective on what is needed to progress the field            |
| 7.                                                                                                                                                                                                                                                | International Child Health Research Institution              | Policy, programming & research. | ECD in global child health – challenges and future directions.                       |
| 8.                                                                                                                                                                                                                                                | Non-government disability-ECD organisation - national level. | Policy and programming.         | Inclusion in ECD programming – iNGO perspective                                      |
| 9.                                                                                                                                                                                                                                                | Ministry of Health, sub-Saharan African country.             | Policy and Programming          | ECD in global child health, health perspectives.                                     |
| <b>OTHER EXPERTS IN FIELD</b>                                                                                                                                                                                                                     |                                                              |                                 |                                                                                      |
| <b>General</b>                                                                                                                                                                                                                                    |                                                              |                                 |                                                                                      |
| 10.                                                                                                                                                                                                                                               | Public health academic institution, UK                       | Senior Researcher               | Research priorities in ECD                                                           |
| 11.                                                                                                                                                                                                                                               | Public health academic institution, USA.                     | Senior Researcher.              | Challenges, priorities and approaches in future ECD research.                        |
| <b>Specific technical</b>                                                                                                                                                                                                                         |                                                              |                                 |                                                                                      |
| 12.                                                                                                                                                                                                                                               | Public health academic institution, USA.                     | Senior Researcher.              | Impact metrics                                                                       |
| 13.                                                                                                                                                                                                                                               | Public health academic institution, USA.                     | Researcher.                     | Impact metrics                                                                       |
| 14.                                                                                                                                                                                                                                               | Public health academic institution, UK                       | Senior Researcher.              | Impact metrics                                                                       |
| 15.                                                                                                                                                                                                                                               | Multilateral UN organisation.                                | Senior Researcher.              | Impact metrics                                                                       |
| 16.                                                                                                                                                                                                                                               | Saving Brains Grant Recipient Research Institution.          | Senior Researcher.              | Implementation process metrics, human resourcing.                                    |
| 17.                                                                                                                                                                                                                                               | Saving Brains Grant Recipient Research Institution.          | Senior Researcher.              | Implementation process metrics, cost-effectiveness                                   |
| 18.                                                                                                                                                                                                                                               | Saving Brains Grant Recipient Research Institution.          | Senior Researcher.              | Integration.                                                                         |
| 19.                                                                                                                                                                                                                                               | Academic Centre, USA.                                        | Senior Researcher.              | Implementation process knowledge gaps, priority questions and research methodology.  |
| <b>Saving Brains Platform</b>                                                                                                                                                                                                                     |                                                              |                                 |                                                                                      |
| Members of the Saving Brains Platform team who were consulted about various aspects of the evaluation, their experiences working within the Saving Brains portfolio and in regard to specific technical, programming and research related themes. |                                                              |                                 |                                                                                      |
| <b>Grantees</b>                                                                                                                                                                                                                                   |                                                              |                                 |                                                                                      |
| Twenty-one of thirty-nine (54%) of research teams were specifically interviewed regarding their innovation and various aspects of their experiences within the Saving Brains portfolio.                                                           |                                                              |                                 |                                                                                      |

ECD=Early Child Development

Web Appendix Table D: Saving Brains responsive care and early learning (RCEL) Transition-to-Scale projects: Summary of challenges and course correction

| Project Name                                             | Transition to scale of an integrated program of nutritional care and psychosocial stimulation to improve malnourished children's development                                                                              | An integrated intervention targeted at deprived pre-school children in rural areas                                                                                                                                                                      | Home visiting programs to improve early child development and maternal mental health                                                                                                                                                       | Saving Brains, Changing Mindsets                                                                                                                                                                                                                                                |
|----------------------------------------------------------|---------------------------------------------------------------------------------------------------------------------------------------------------------------------------------------------------------------------------|---------------------------------------------------------------------------------------------------------------------------------------------------------------------------------------------------------------------------------------------------------|--------------------------------------------------------------------------------------------------------------------------------------------------------------------------------------------------------------------------------------------|---------------------------------------------------------------------------------------------------------------------------------------------------------------------------------------------------------------------------------------------------------------------------------|
| <b>HUMAN RESOURCES: CHALLENGES AND COURSE CORRECTION</b> |                                                                                                                                                                                                                           |                                                                                                                                                                                                                                                         |                                                                                                                                                                                                                                            |                                                                                                                                                                                                                                                                                 |
| <i>Interaction with existing services</i>                | Integration and coordination with health services in rural Bangladesh.                                                                                                                                                    | Competition from a new government-run parenting program,                                                                                                                                                                                                | Integration into existing family health strategy home-visits increased visit frequency but reduced number of families visited. Local workers demanded financial incentives to deliver new project and prioritized pre-existing activities. | Issues encountered were gaining confidence and trust of construction companies, quality assurance of individual NGOs, securing adequate infrastructure, particularly as a decline in the construction industry slowed project progress                                          |
| <i>Adaptation for implementation</i>                     | -                                                                                                                                                                                                                         | Shift required from didactic learning to 'demonstration and practice' method of learning. Supervision forms were adapted to type of data collected.                                                                                                     | Busy schedule of CHWs meant missed appointments were not rescheduled. CDAs more frequently rescheduled visits. Supervision was jeopardised by existing heavy workloads and required intervention by project coordinator.                   | During scale-up, the focus remained on strengthening supervision quality of partner NGOs.                                                                                                                                                                                       |
| <i>Training time commitment</i>                          | Training schedule difficulty for government clinic workers was mitigated by split of training schedules to maintain clinic duty cover.                                                                                    | Long training time commitment was mitigated by incentivisation.                                                                                                                                                                                         | -                                                                                                                                                                                                                                          | -                                                                                                                                                                                                                                                                               |
| <i>Staff recruitment / remuneration / retention</i>      | Salaried government workers expected incentivisation for additional work and some refused to conduct sessions; this was mitigated by motivational meetings and supervision.                                               | Attrition of workers was mitigated through fast-track training programme. Workers in one affluent town did not value RCEL project, and tasks were unfamiliar to these workers (<3% of sample).                                                          | Difficulty in identifying CHWs to deliver intervention in addition to existing routine. High turnover of CHWs considering intervention too time consuming.                                                                                 | Difficulties in identifying sufficiently qualified workers, but not overqualified and viewed RCEL as 'beneath their station'. Initial high attrition rates as workers apprehensive about working with children <3 yrs. Changes made to training modules and selection criteria. |
| <i>Supervision</i>                                       | -                                                                                                                                                                                                                         | Reticence from providers unfamiliar with close coaching was mitigated by promoting positive tutoring relationships. Implications and impacts from rurality of workers on supervision.                                                                   | Supervision not considered a priority by supervisor priority requiring project coordinator to intervene, holding meetings with CDAs and performing supervised visits.                                                                      | -                                                                                                                                                                                                                                                                               |
| <b>CONTENT: CHALLENGES AND COURSE CORRECTION</b>         |                                                                                                                                                                                                                           |                                                                                                                                                                                                                                                         |                                                                                                                                                                                                                                            |                                                                                                                                                                                                                                                                                 |
| <i>Adaptation for implementation</i>                     | Minor adaptations to Reach-up for the pair study and major adaptation for the group study. Adapted for use in community clinics instead of homes and to be used for fortnightly visits instead of weekly in both studies. | Simplification of curricula language to facilitate provider use. Reluctance to lend toys/materials led to introduction of toy library. Wide developmental age range in groups led to adaptation with more baby-friendly routines and sub-groups by age. | Reach-Up was adapted for twice monthly visits instead of the original weekly visit. Mothers did not like the toy's original appearance which they considered poor. Toy was redesigned to be more appealing.                                | During scale-up in other regions of India e.g. Bangalore, training module was contextualized, and nutrition menu adapted to the local context.                                                                                                                                  |
| <i>Materials</i>                                         | Complaints regarding quality of toys (parents) led to extended provider training to facilitate more 'fun' interactive                                                                                                     | Initial reluctance for recyclable toy materials but toy-making workshops changed perceptions. Toy library                                                                                                                                               | Materials required cultural adaptation. Adaptation guide needed to be clear regarding exactly what could be adapted                                                                                                                        | Materials were translated for regions requiring the desired learning materials.                                                                                                                                                                                                 |

|                                                              |                                                                                                                                                                                                                                                                                 |                                                                                                                                                                                                                                                                                                   |                                                                                                                                                                                                      |          |
|--------------------------------------------------------------|---------------------------------------------------------------------------------------------------------------------------------------------------------------------------------------------------------------------------------------------------------------------------------|---------------------------------------------------------------------------------------------------------------------------------------------------------------------------------------------------------------------------------------------------------------------------------------------------|------------------------------------------------------------------------------------------------------------------------------------------------------------------------------------------------------|----------|
|                                                              | sessions and directions for making new toys.                                                                                                                                                                                                                                    | developed to promote unrestricted use which was appreciated by caregivers.                                                                                                                                                                                                                        | and what concepts had to be maintained to guarantee fidelity.                                                                                                                                        |          |
| <i>Recipient attendance, retention &amp; incentivisation</i> | Attendance challenges included distance to clinic, late start to sessions, and expectation of nutritional supplement. More timely attendance and stricter time-keeping encouraged. Incentivisation included oil supplementation distribution & caregiver motivational meetings. | High value of project nutritional package incentivised attendance. Tutors and providers supported problem-solving to overcome barriers to attendance (i.e. long distances, travel costs, job responsibilities etc.). Encouraging positive social interactions meant beneficiaries more motivated. | Beneficiaries had no other incentives but the program itself. The major cause of attrition was mobile populations due to rental accommodation. Mothers enjoyed and wanted to complete the programme. | -        |
| <b>References</b>                                            | (21-23)                                                                                                                                                                                                                                                                         | (23, 24)                                                                                                                                                                                                                                                                                          | (23, 25)                                                                                                                                                                                             | (23, 26) |

CDA=Child development agent, CHW=Community health worker, RCEL=Responsive caregiving and early learning

# BMJ Open

## Human resources and curricula content for early child development implementation: multi-country mixed-methods evaluation

|                                 |                                                                                                                                                                                                                                                                                                                                                                                                                                                                                                                                                                                                                                                                                                                                                                                                                                                                                                                                                                                                                                                                                                                                                                                                                                                                                                                                                                                                                                                                                                                                                                                                                                                                                                                                                                                                                                                                                            |
|---------------------------------|--------------------------------------------------------------------------------------------------------------------------------------------------------------------------------------------------------------------------------------------------------------------------------------------------------------------------------------------------------------------------------------------------------------------------------------------------------------------------------------------------------------------------------------------------------------------------------------------------------------------------------------------------------------------------------------------------------------------------------------------------------------------------------------------------------------------------------------------------------------------------------------------------------------------------------------------------------------------------------------------------------------------------------------------------------------------------------------------------------------------------------------------------------------------------------------------------------------------------------------------------------------------------------------------------------------------------------------------------------------------------------------------------------------------------------------------------------------------------------------------------------------------------------------------------------------------------------------------------------------------------------------------------------------------------------------------------------------------------------------------------------------------------------------------------------------------------------------------------------------------------------------------|
| Journal:                        | <i>BMJ Open</i>                                                                                                                                                                                                                                                                                                                                                                                                                                                                                                                                                                                                                                                                                                                                                                                                                                                                                                                                                                                                                                                                                                                                                                                                                                                                                                                                                                                                                                                                                                                                                                                                                                                                                                                                                                                                                                                                            |
| Manuscript ID                   | bmjopen-2019-032134.R2                                                                                                                                                                                                                                                                                                                                                                                                                                                                                                                                                                                                                                                                                                                                                                                                                                                                                                                                                                                                                                                                                                                                                                                                                                                                                                                                                                                                                                                                                                                                                                                                                                                                                                                                                                                                                                                                     |
| Article Type:                   | Research                                                                                                                                                                                                                                                                                                                                                                                                                                                                                                                                                                                                                                                                                                                                                                                                                                                                                                                                                                                                                                                                                                                                                                                                                                                                                                                                                                                                                                                                                                                                                                                                                                                                                                                                                                                                                                                                                   |
| Date Submitted by the Author:   | 13-Feb-2020                                                                                                                                                                                                                                                                                                                                                                                                                                                                                                                                                                                                                                                                                                                                                                                                                                                                                                                                                                                                                                                                                                                                                                                                                                                                                                                                                                                                                                                                                                                                                                                                                                                                                                                                                                                                                                                                                |
| Complete List of Authors:       | <p>Kohli-Lynch, Maya; London School of Hygiene and Tropical Medicine, Maternal, Adolescent, Reproductive and Child Health Centre; University of Bristol, School of Social and Community Medicine</p> <p>Ponce Hardy, Victoria; London School of Hygiene and Tropical Medicine, Maternal, Adolescent, Reproductive and Child Health Centre</p> <p>Bernal Salazar, Raquel; Universidad de Los Andes, Economics Department; Universidad de los Andes, Centro de Estudios de Desarrollo Economico (CEDE)</p> <p>Bhopal, Sunil; London School of Hygiene and Tropical Medicine, Maternal &amp; Child Health Intervention Research Group; Northern School of Paediatrics</p> <p>Brentani, Alexandra; Universidade de Sao Paulo, Departamento de Pediatria, Faculdade de Medicina</p> <p>Cavallera, Vanessa; World Health Organization, Department of Mental Health and Substance Abuse</p> <p>Goh, Esther; Bernard Van Leer Foundation</p> <p>Hamadani, Jena; icddr, Maternal and Child Health Division</p> <p>Hughes, Rob; London School of Hygiene and Tropical Medicine, Maternal &amp; Child Health Intervention Research Group</p> <p>Manji, Karim; Muhimbili University of Health and Allied Sciences, Department of Paediatrics and Child Health; Pediatrics</p> <p>Milner, Kate; London School of Hygiene and Tropical Medicine, Maternal, Adolescent, Reproductive and Child Health Centre; Murdoch Childrens Research Institute</p> <p>Radner, James; University of Toronto, Munk School of Global Affairs &amp; Public Policy; Harvard University, Center on the Developing Child</p> <p>Sharma, Sonia; Mobile Crèches, Sector IV</p> <p>Silver, Karlee; Grand Challenges Canada</p> <p>Lawn, Joy; London School of Hygiene and Tropical Medicine, Maternal, Adolescent, Reproductive and Child Health Centre</p> <p>Tann, Cally; London School of Hygiene and Tropical Medicine,</p> |
| <b>Primary Subject Heading</b>: | Public health                                                                                                                                                                                                                                                                                                                                                                                                                                                                                                                                                                                                                                                                                                                                                                                                                                                                                                                                                                                                                                                                                                                                                                                                                                                                                                                                                                                                                                                                                                                                                                                                                                                                                                                                                                                                                                                                              |
| Secondary Subject Heading:      | Paediatrics                                                                                                                                                                                                                                                                                                                                                                                                                                                                                                                                                                                                                                                                                                                                                                                                                                                                                                                                                                                                                                                                                                                                                                                                                                                                                                                                                                                                                                                                                                                                                                                                                                                                                                                                                                                                                                                                                |
| Keywords:                       | early child development, implementation, health systems, child health, evaluation                                                                                                                                                                                                                                                                                                                                                                                                                                                                                                                                                                                                                                                                                                                                                                                                                                                                                                                                                                                                                                                                                                                                                                                                                                                                                                                                                                                                                                                                                                                                                                                                                                                                                                                                                                                                          |

1  
2  
3  
4  
5  
6  
7  
8  
9  
10  
11  
12  
13  
14  
15  
16  
17  
18  
19  
20  
21  
22  
23  
24  
25  
26  
27  
28  
29  
30  
31  
32  
33  
34  
35  
36  
37  
38  
39  
40  
41  
42  
43  
44  
45  
46  
47  
48  
49  
50  
51  
52  
53  
54  
55  
56  
57  
58  
59  
60



SCHOLARONE™  
Manuscripts





I, the Submitting Author has the right to grant and does grant on behalf of all authors of the Work (as defined in the below author licence), an exclusive licence and/or a non-exclusive licence for contributions from authors who are: i) UK Crown employees; ii) where BMJ has agreed a CC-BY licence shall apply, and/or iii) in accordance with the terms applicable for US Federal Government officers or employees acting as part of their official duties; on a worldwide, perpetual, irrevocable, royalty-free basis to BMJ Publishing Group Ltd ("BMJ") its licensees and where the relevant Journal is co-owned by BMJ to the co-owners of the Journal, to publish the Work in this journal and any other BMJ products and to exploit all rights, as set out in our [licence](#).

The Submitting Author accepts and understands that any supply made under these terms is made by BMJ to the Submitting Author unless you are acting as an employee on behalf of your employer or a postgraduate student of an affiliated institution which is paying any applicable article publishing charge ("APC") for Open Access articles. Where the Submitting Author wishes to make the Work available on an Open Access basis (and intends to pay the relevant APC), the terms of reuse of such Open Access shall be governed by a Creative Commons licence – details of these licences and which [Creative Commons](#) licence will apply to this Work are set out in our licence referred to above.

Other than as permitted in any relevant BMJ Author's Self Archiving Policies, I confirm this Work has not been accepted for publication elsewhere, is not being considered for publication elsewhere and does not duplicate material already published. I confirm all authors consent to publication of this Work and authorise the granting of this licence.

Paper Title: **Human resources and curricula content for early child development implementation: multi-country mixed-methods evaluation**

|                |                                                                                                                                                                                                                                                                                                                                                                                                                                                                                                                                                                                                                                                                                                                                                                                                                                                                                                                                                                                                                                                                                                                                                                                                                                                                                                                                                                                                                                                                                                                                                                                                                                                                                                                                                            |
|----------------|------------------------------------------------------------------------------------------------------------------------------------------------------------------------------------------------------------------------------------------------------------------------------------------------------------------------------------------------------------------------------------------------------------------------------------------------------------------------------------------------------------------------------------------------------------------------------------------------------------------------------------------------------------------------------------------------------------------------------------------------------------------------------------------------------------------------------------------------------------------------------------------------------------------------------------------------------------------------------------------------------------------------------------------------------------------------------------------------------------------------------------------------------------------------------------------------------------------------------------------------------------------------------------------------------------------------------------------------------------------------------------------------------------------------------------------------------------------------------------------------------------------------------------------------------------------------------------------------------------------------------------------------------------------------------------------------------------------------------------------------------------|
| Author list:   |                                                                                                                                                                                                                                                                                                                                                                                                                                                                                                                                                                                                                                                                                                                                                                                                                                                                                                                                                                                                                                                                                                                                                                                                                                                                                                                                                                                                                                                                                                                                                                                                                                                                                                                                                            |
| First author:  | Maya Kohli-Lynch <sup>1,2</sup>                                                                                                                                                                                                                                                                                                                                                                                                                                                                                                                                                                                                                                                                                                                                                                                                                                                                                                                                                                                                                                                                                                                                                                                                                                                                                                                                                                                                                                                                                                                                                                                                                                                                                                                            |
| Second author: | Victoria Ponce Hardy <sup>1</sup>                                                                                                                                                                                                                                                                                                                                                                                                                                                                                                                                                                                                                                                                                                                                                                                                                                                                                                                                                                                                                                                                                                                                                                                                                                                                                                                                                                                                                                                                                                                                                                                                                                                                                                                          |
| Alphabetical:  | Raquel Bernal Salazar <sup>3,4</sup> , Sunil Bhopal <sup>5,6</sup> , Alexandra Brentani <sup>7</sup> , Vanessa Cavallera <sup>8</sup> , Esther Goh <sup>9</sup> , Jena Hamadani <sup>10</sup> , Rob Hughes <sup>5</sup> , Karim Manji <sup>11</sup> , Kate M Milner <sup>1,12</sup> , James Radner <sup>13,14</sup> , Sonia Sharma <sup>15</sup> , Karlee Silver <sup>16</sup> , Joy E Lawn <sup>1</sup>                                                                                                                                                                                                                                                                                                                                                                                                                                                                                                                                                                                                                                                                                                                                                                                                                                                                                                                                                                                                                                                                                                                                                                                                                                                                                                                                                   |
| Last author:   | Cally J Tann <sup>1,17</sup>                                                                                                                                                                                                                                                                                                                                                                                                                                                                                                                                                                                                                                                                                                                                                                                                                                                                                                                                                                                                                                                                                                                                                                                                                                                                                                                                                                                                                                                                                                                                                                                                                                                                                                                               |
| Affiliations   | <ol style="list-style-type: none"> <li>1. Maternal, Adolescent, Reproductive and Child Health Centre, London School of Hygiene &amp; Tropical Medicine, London, UK</li> <li>2. School of Social and Community Medicine, University of Bristol, Bristol, UK</li> <li>3. Economics Department, Universidad de los Andes, Bogota, Colombia</li> <li>4. Centre de Estudios de Desarrollo Economico (CEDE), Universidad de los Andes, Colombia</li> <li>5. Maternal &amp; Child Health Intervention Research Group, Department of Population Health, London School of Hygiene &amp; Tropical Medicine, London, UK</li> <li>6. Northern School of Paediatrics, Newcastle upon Tyne, UK</li> <li>7. Departamento de Pediatria, Faculdade de Medicina da Universidade de São Paulo, São Paulo, Brazil</li> <li>8. Department of Mental Health and Substance Abuse, World Health Organization, Geneva, Switzerland</li> <li>9. Bernard van Leer Foundation, The Hague, The Netherlands</li> <li>10. Maternal and Child Health Division, International Centre for Diarrhoeal Disease Research, Dhaka, Bangladesh</li> <li>11. Department of Paediatrics and Child Health, Muhimbili University of Allied Health Allied Sciences, Dar es Salaam, Tanzania</li> <li>12. Murdoch Children's Research Institute, Melbourne, Australia</li> <li>13. Munk School of Global Affairs &amp; Public Policy, University of Toronto, Toronto, Canada</li> <li>14. Center on the Developing Child, Harvard University, Cambridge, Massachusetts, USA</li> <li>15. Mobile Crèches, Sector IV, New Delhi, India</li> <li>16. Grand Challenges Canada, Toronto, Ontario, Canada</li> <li>17. Neonatal Medicine, University College London Hospitals NHS Trust, London, UK</li> </ol> |

**Corresponding Author:** Cally J Tann, c/- Maternal, Adolescent, Reproductive and Child Health Centre, London School of Hygiene & Tropical Medicine, Keppel Street, London, WC1E 7HT, UK, cally.tann@lshtm.ac.uk

**Word count** (excluding title page, abstract, references, textboxes, tables, figures): 4755

## ABSTRACT

**Objective:** The World Health Organization recommends responsive caregiving and early learning (RCEL) interventions to improve early child development (ECD), and to achieve the Sustainable Development Goals' vision of a world where all children thrive. Implementation of RCEL programmes in low- and middle-income countries (LMIC) requires evidence to inform decisions about human resources and curricula content. We aimed to describe human resources and curricula content for implementation of RCEL projects across diverse LMIC, using data from the Grand Challenges Canada® Saving Brains® ECD portfolio.

**Setting:** We evaluated 32 RCEL projects across 17 LMIC on four continents.

**Participants:** Overall, 2,165 workers delivered ECD interventions to 25,909 families.

**Intervention:** Projects were either standalone RCEL or RCEL combined with health and nutrition, and/or safety and security.

**Primary and secondary outcomes:** We undertook a mixed-methods evaluation of RCEL projects within the Saving Brains® portfolio. Quantitative data were collected through standardised reporting tools. Qualitative data were collected from ECD experts and stakeholders and analysed using thematic content analysis, informed by literature review.

**Results:** Major themes regarding human resources included: worker characteristics, incentivisation, retention, training and supervision, and regarding curricula content: flexible adaptation of content and delivery, fidelity, and intervention duration and dosage. Lack of an agreed standard ECD package contributed to project heterogeneity. Incorporation of ECD into existing services may facilitate scale-up but overburdened workers plus potential reductions in service quality remain challenging. Supportive training and supervision, inducement, worker retention, dosage and delivery modality emerged as key implementation decisions.

**Conclusions:** This mixed-method evaluation of a multi-country ECD portfolio identified themes for consideration by policymakers and programme leaders relevant to RCEL implementation in diverse LMIC. Larger studies, that also examine impact, including high-

1  
2  
3 quality process and costing evaluations with comparable data, are required to further inform  
4 decisions for implementation of RCEL projects at national and regional scale.  
5  
6  
7  
8  
9

## 10 **ARTICLE SUMMARY**

### 11 **Strengths and limitations of this study**

- 12  
13  
14  
15  
16 • We analysed data from 32 RCEL projects based in 17 low- and middle-income  
17 countries, from the multi-country Saving Brains® early child development portfolio,  
18 including data from a total of 2,165 frontline workers who delivered interventions to  
19 over 25,000 children and parents.  
20  
21  
22
- 23 • Our mixed-methods approach to this analysis enabled us to draw rich and varied  
24 conclusions from both quantitative project data and qualitative stakeholder  
25 interviews.  
26  
27  
28
- 29 • Several process-related metrics, such as coverage, equity and cost-effectiveness, were  
30 not commonly reported by the projects and so were difficult to explore fully in this  
31 analysis.  
32  
33  
34
- 35 • Impact data were not available for most projects at the time of the evaluation and so  
36 no assessment of impact was included.  
37  
38  
39
- 40 • High heterogeneity within the Saving Brains portfolio presented challenges in  
41 drawing conclusions for individual project implementation.  
42  
43  
44  
45  
46  
47  
48  
49  
50  
51  
52  
53  
54  
55  
56  
57  
58  
59  
60

## BACKGROUND

Optimal early child development (ECD) is central to the Sustainable Development Goals' vision of a world in which children can *thrive*.(1, 2) ECD programmes have the potential to transform human capital across the life course, and scale-up of responsive caregiving and early learning (RCEL) is advocated by the World Health Organization, UNICEF and World Bank, as a key part of the Nurturing Care Framework launched in 2018 (see Box 1).(3-7) Programmes promoting RCEL have been found to be effective for ECD and related to longer term outcomes, including educational attainment and adult earnings.(5, 8)

### **Box 1: Terms for responsive care & early learning for early child development**

Multiple terms are used to describe interventions that promote early child development. The World Health Organization, UNICEF & World Bank's Nurturing Care Framework refers to a spectrum of requirements necessary for reaching full developmental potential, including: good health, security and safety, nutrition, responsive caregiving, and early learning.

In this paper, we use the concept of nurturing care, and specifically the term 'responsive care and early learning' (RCEL). RCEL describes the promotion of ECD through learning, play, and caregiving that is responsive to children's needs.(5, 9, 10) Similar terms include 'responsive care/caregiving', 'responsive stimulation', 'nurturing care', 'psychosocial stimulation', 'early learning' and 'play'.

However, there are limited data to guide practical implementation of RCEL programmes at scale in low- and middle-income countries (LMIC), and a particular lack of data regarding human resources and curricula content.(11-13) Additionally, guidance for contextual adaptation of projects is crucial but complex for RCEL which involves sectors beyond health. These gaps present challenges to decision-makers and may result in small-scale projects making design choices that limit the potential for sustainable scaling.(5, 14, 15) Thus, analysis of implementation factors for scaling of RCEL projects, particularly human resources and curricula content, is needed.(11)

The *Lancet* series 'Advancing Early Child Development: from Science to Scale' (16) and the *Annals of the New York Academy of Sciences* series 'Implementation Research and Practice for Early Childhood Development' (17) described gaps in the literature relating to ECD programming. The *Archives of Diseases in Childhood* series 'Informing design and implementation for early child development programmes' (18-22) provided evidence from

1  
2  
3 the Grand Challenges Canada® (GCC) Saving Brains® portfolio for decision points related to  
4 ECD programming but did not specifically address human resources and curricula content.  
5  
6 This paper responds to this gap, building on *Radner et al's* exploration of lessons learned on  
7 scaling from the Saving Brains portfolio, to explore human resources and curricula content in  
8 a diverse range of RCEL programmes from the same portfolio.(23) We predominantly use a  
9 health sector perspective, and contextualise our findings within learning from multi-country  
10 evaluations of community-based maternal and newborn care and evaluations of mental  
11 health and nutrition programming.  
12  
13  
14  
15  
16  
17  
18

### 19 **Aims & objectives**

20  
21 This paper aims to describe human resources and curricula content for implementation of  
22 RCEL projects across diverse LMIC, using data from the Saving Brains portfolio. We will  
23 address *who* delivers the project, including training, supervision and inducement; and *what*  
24 the specific curricula content is, including materials, intensity, quality, fidelity and adaptation.  
25  
26  
27  
28

29 Objectives are to:

- 30  
31  
32 1. Quantitatively analyse human resources and curricula content for RCEL projects in the  
33 Saving Brains portfolio.
- 34  
35 2. Qualitatively analyse programme design and implementation decisions, focusing on  
36 themes related to human resources and curricula content.
- 37  
38 3. Synthesise lessons learned and implications for future design and implementation of  
39 RCEL programmes at scale.  
40  
41  
42  
43

### 44 **METHODS**

45  
46 We took a mixed-methods approach, incorporating quantitative data from an evaluation of  
47 projects in the Saving Brains portfolio alongside qualitative data from in-depth interviews  
48 (IDI) and focus group discussions (FGD) with ECD experts and Saving Brains project leads.  
49 Impact and outcome data were not available for the majority of projects at the time of the  
50 evaluation and were therefore not included in the evaluation.  
51  
52  
53  
54  
55  
56  
57  
58  
59  
60

## Overview of the Saving Brains Portfolio evaluation

Saving Brains is a diverse portfolio of projects, each aimed at improving ECD in LMIC through interventions in the first thousand days, as outlined by *Radner et al.*(23) Projects sought to improve brain development through preventing brain injury, promoting stimulating and responsive environments and/or protecting children from developmental risk factors.(18) An evaluation of Saving Brains was undertaken in 2016-2017 by a team from the London School of Hygiene & Tropical Medicine in collaboration with the Saving Brains Platform team of experts, led by TruePoint Center/Harvard University and the World Health Organization.(24) The team evaluated 39 Saving Brains Seed and Transition-To-Scale (TTS) grants awarded between 2012 and 2016 to project leads from LMIC with variable design and implementation approaches (see *Milner et al* for summary of projects).(18) Seed grants focused on demonstration of 'proof of concept' over 18-24 months while TTS grants focused on progression towards scale in partnership with other organisations over 3 years. The portfolio evaluation team developed a conceptual evaluation framework (Web Appendix Figure A) based on the Medical Research Council Guidance on Evaluation of Complex Interventions and developed around a portfolio-level 'theory of change' (developed by Saving Brains Platform members) (Web Appendix Figure B).(25) The conceptual evaluation framework provided a structure for the evaluation to systematically consider, describe and assess human resource and curricula content implementation factors. The evaluation team referred to the conceptual evaluation framework throughout the evaluation process to ensure comprehensive assessment of human resource and curricula content issues. The 'theory of change' metric indicators directly relate to Results-based Management and Accountability Framework data points (see below) collected by each project.

### Objective 1. Quantitative data sources and analyses

#### *Quantitative data sources*

Quantitative data on project design and implementation were collected from GCC pre-specified data collection tools (Web Appendix Table A). Service Delivery Forms (SDFs) comprised data regarding human resources and RCEL curricula and the Results-based Management and Accountability Framework (RMAF) comprised data on numbers of recipients and beneficiaries, child growth and development outcomes, parental and home

1  
2  
3 environment outcomes, and funding, coverage and context of projects. Data were extracted  
4 from SDFs and RMAFs and imported into Microsoft Excel for cleaning, management and  
5 analysis (May-Nov 2016).  
6  
7  
8

### 9 *Quantitative analysis*

10  
11  
12 Descriptive statistics relating to frequency and mode of outcome measurement across the  
13 portfolio were generated using Stata 14 and Microsoft Excel. Data on occupation of workers  
14 delivering the RCEL projects were classified according to the International Standardised  
15 Classification of Occupations.(26) For quantitative analysis, projects were grouped to  
16 highlight differences in implementation design factors. Groupings were as follows i) all RCEL  
17 projects ii) standalone RCEL projects and iii) integrated RCEL projects, where 'integrated  
18 projects' were integrated with another domain of the Nurturing Care Framework (other than  
19 RCEL) and 'standalone projects' were not.  
20  
21  
22  
23  
24  
25  
26  
27

## 28 **Objective 2: Qualitative data sources and analyses**

### 29 *Literature review and topic guides*

30  
31  
32  
33  
34  
35  
36  
37  
38  
39  
40  
41  
42  
43  
44  
45  
46  
47  
48  
49  
50  
51  
52  
53  
54  
55  
56  
57  
58  
59  
60  
IDI and FGD were facilitated using topic guides, which were developed based on a literature  
review guided by the Consolidated Criteria for Reporting Qualitative Research. The review  
explored implementation experiences relating to human resources and curricula content  
amongst ECD experts and Saving Brains project leads. Thematic areas of enquiry (Web  
Appendix Table B) were established based on the literature, stakeholder consultation, and  
analysis of written project proposals and progress reports submitted by project leads to GCC  
(Web Appendix Table A). Our analysis was also informed by examples from the literature of  
similar efforts to support decision-making for implementation in other maternal and  
newborn health projects in LMIC.

Medline and Embase were searched, with the following MeSH terms; 'Child development' OR  
'Developmental Disabilities' AND 'Developing Countries'. Additional articles were retrieved  
through reference lists of identified articles and publications from the Saving Brains  
community. Grey literature was searched via websites of major multilateral organisations  
engaged in ECD programming including the World Health Organization, UNICEF, Save the



1  
2  
3 Children Fund, the World Bank, World Vision International, other related organisations, and  
4  
5 Google.

### 6 7 8 *Qualitative data inputs from key informant interviews and focus group discussions*

9  
10 Key informants (n=19) were ECD experts implementing ECD programmes in LMIC (Web  
11 Appendix Table C). ECD experts were purposively selected from professional networks  
12 including national and international programmers and policy makers, ECD researchers,  
13 Saving Brains project leads, and members of the Saving Brains Platform and GCC. All key  
14 informants were invited to participate by email. IDI were conducted with key informants and  
15 FGD with Saving Brains project leads, with between 4 and 10 participants per FGD. All  
16 participants provided verbal informed consent and data collection was concluded once  
17 saturation was reached.

18  
19  
20  
21  
22  
23  
24  
25  
26  
27  
28  
29  
30  
31  
32  
33  
34  
35  
36  
37  
38  
39  
40  
41  
42  
43  
44  
45  
46  
47  
48  
49  
50  
51  
52  
53  
54  
55  
56  
57  
58  
59  
60  
IDI and FGD were conducted in English (Jun-Oct 2016) and were audio recorded or  
transcribed by a member of the evaluation team. Each IDI lasted approximately 60 minutes  
while each FGD lasted between 60 and 90 minutes. All IDI and FGD were conducted face-to-  
face or via an online video link. Interviewers and FGD facilitators summarised and verified  
throughout data collection to improve validity of results. Meetings of Saving Brains  
innovators and partners on prioritising research in ECD and strategies for implementation of  
interventions were audio recorded and/or transcribed. Audio recordings of IDI, FGD and  
meetings were submitted to a third party for transcription. Members of the Saving Brains  
evaluation team conducted IDI (MKL, KMM and VC) and facilitated FGD (CJT, KMM, VC)  
alongside members of the Saving Brains platform.

Qualitative data also included Saving Brains project progress reports; written narratives on  
implementation challenges and mitigation strategies.

### 50 51 *Qualitative analysis*

52  
53  
54  
55  
56  
57  
58  
59  
60  
Written project documents and transcribed IDI and FGD were de-identified, imported and  
coded in NVivo 11. Data were independently coded line-by-line by two members of the  
evaluation team (MKL, KMM). An inductive approach was used to create a coding framework,  
and thematic content analysis was undertaken to explore themes related to human resources

and curricula content until saturation was reached. Inter-rater coding reliability was high on review of NVivo 11 coding reports.

### **Patient and Public Involvement**

This evaluation was conducted without direct patient involvement and they did not contribute to the interpretation of results or writing and editing of this document. However, families were frequently involved in different aspects of the design and interpretation of individual projects within Saving Brains including, but not limited to, the materials used in intervention delivery and methods for incentivising participation.

### **Ethics approval**

The study was approved by the London School of Hygiene & Tropical Medicine Ethics Committee (16001/RR/11202). Deidentified data were used in this analysis.

## **RESULTS**

### **Overview: quantitative and qualitative results**

32 of the 39 Seed and TTS projects included some aspect of RCEL (Figure 1); the 7 non-RCEL projects were not included in this analysis. Of these 32 projects, 34% (n=11) projects were standalone RCEL interventions and 66% (n=21) were integrated with interventions in 'health and nutrition' (10 projects), 'security and safety' (9 projects) or both (2 projects) (Figure 1). Projects were implemented in 17 LMIC across four continents (see Figure 2).

IDI were conducted with 66% (n=21) of Saving Brains project teams including all TTS projects. Emergent themes from the qualitative analysis are presented in Table 1. Saving Brains TTS project leads provided quantitative data on these emergent themes (Table 2).

**Table 1:** Themes and sub-themes from quantitative and qualitative data analysis for 32 Saving Brains projects, and 19 key informant in-depth interviews regarding human resources and curricula content for early child development (ECD) programming

|                        | <b>Themes</b>                            | <b>Sub-themes</b>                                  |
|------------------------|------------------------------------------|----------------------------------------------------|
| <b>Human Resources</b> | 1. Characteristics / selection of worker | 1.1 Health vs other sector                         |
|                        |                                          | 1.2 Integration with existing programmes           |
|                        |                                          | 1.3 Pre-existing government worker vs novel worker |
|                        |                                          | 1.4 Professional vs lay worker                     |

|                                      |                                  |                                        |
|--------------------------------------|----------------------------------|----------------------------------------|
| <b>Curricula content</b>             | 2. Inducement and retention      | 1.5 Qualities and qualifications       |
|                                      |                                  | 2.1 Modalities of incentivisation      |
|                                      |                                  | 2.2 Impact on pre-existing workers     |
|                                      | 3. Training and supervision      | 3.1 Content of training                |
|                                      |                                  | 3.2 Flexibility vs fidelity            |
|                                      |                                  | 3.3 Education theory                   |
|                                      |                                  | 3.4 Supportive relationships           |
|                                      | 4. Content and components        | 4.1 Defining critical components       |
|                                      |                                  | 4.2 Formative work and adaptation      |
|                                      |                                  | 4.3 Flexibility vs fidelity            |
|                                      |                                  | 4.4 Behaviour change                   |
|                                      | 5. Delivery, duration and dosage | 5.1 Adapting delivery to local context |
| 5.2 Intervention duration and dosage |                                  |                                        |
| 5.3 Retention of participants        |                                  |                                        |

**Table 2:** Description of the Saving Brains responsive care and early learning (RCEL) Transition-to-Scale projects: Summary of human resources and curricula content (N=4 projects)

| Project Name                                                       | Transition to scale of an integrated program of nutritional care and psychosocial stimulation to improved malnourished children’s development | An integrated intervention targeted at deprived pre-school children in rural areas | Home visiting programs to improve early child development and maternal mental health                  | Saving Brains, Changing Mindsets                                                                  |
|--------------------------------------------------------------------|-----------------------------------------------------------------------------------------------------------------------------------------------|------------------------------------------------------------------------------------|-------------------------------------------------------------------------------------------------------|---------------------------------------------------------------------------------------------------|
| Lead Institution                                                   | International Centre for Diarrhoeal Disease Research (ICDDR,B)                                                                                | Universidad de los Andes (UDLA)                                                    | Faculdade de Medicina da Universidade de Sao Paulo (USP)                                              | Mobile Crèches for Working Mothers’ Children (MC)                                                 |
| Country                                                            | Bangladesh                                                                                                                                    | Colombia                                                                           | Brazil                                                                                                | India                                                                                             |
| Site                                                               | Dhaka area: Narsingdi and Kishoreganj. Rural                                                                                                  | Central rural regions: Boyacá, Cundinamarca, Santander                             | Sao Paulo, urban slums in western area                                                                | Delhi area, Bangalore, Ahmedabad, Chandigarh                                                      |
| Vision/ Goal/ Objectives                                           | Integrate RCEL intervention for poor, underweight children into routine government health services                                            | Improve quality of a pre-existing public parenting programme in a scalable fashion | Evaluate the efficacy and cost-effectiveness of two alternative platforms for home visiting programme | Demonstrate scalability of workplace-based childcare for children of migrant construction workers |
| No. participating children                                         | 1,597                                                                                                                                         | 2,134                                                                              | 800                                                                                                   | 4,845                                                                                             |
| <b>HUMAN RESOURCES</b>                                             |                                                                                                                                               |                                                                                    |                                                                                                       |                                                                                                   |
| Type                                                               | Assoc Health Professional                                                                                                                     | Lay community member as paraprofessional                                           | Community Health Workers (CHWs) and Child Development Agents (CDAs)                                   | Personal care worker                                                                              |
| Pre-existing / novel cadre                                         | Pre-existing                                                                                                                                  | Pre-existing                                                                       | CHWs pre-existing, CDAs novel cadre                                                                   | Pre-existing                                                                                      |
| Incentivisation, including remuneration                            | Occasional small gifts.                                                                                                                       | Remunerated by government                                                          | 30% elevated salary pre-existing CHWs, salary-matched CDAs                                            | Salaried                                                                                          |
| Qualification/ skill / competence                                  | Technical qualification                                                                                                                       | Secondary education                                                                | No qualification needed                                                                               | Primary & Secondary education                                                                     |
| Gender of workers                                                  | Majority female                                                                                                                               | Majority female                                                                    | Exclusively female                                                                                    | Majority female                                                                                   |
| Length of training                                                 | 15 days                                                                                                                                       | 85 hrs over 3.5 weeks                                                              | 40 hrs initial (Reach Up) & 32 hrs refresher                                                          | 36 days                                                                                           |
| No. of workers recruited (completing training, delivering project) | 354 (320, 168)                                                                                                                                | 171 (171, 171)                                                                     | 15 (15,13)                                                                                            | 139 (83, 67)                                                                                      |
| Frequency of supervision                                           | Minimum once per month.                                                                                                                       | Every six weeks.                                                                   | Once per week.                                                                                        | Six months rigorous, then monthly.                                                                |

| Project Name                         | Transition to scale of an integrated program of nutritional care and psychosocial stimulation to improved malnourished children's development | An integrated intervention targeted at deprived pre-school children in rural areas | Home visiting programs to improve early child development and maternal mental health | Saving Brains, Changing Mindsets                                    |
|--------------------------------------|-----------------------------------------------------------------------------------------------------------------------------------------------|------------------------------------------------------------------------------------|--------------------------------------------------------------------------------------|---------------------------------------------------------------------|
| <b>CURRICULA CONTENT</b>             |                                                                                                                                               |                                                                                    |                                                                                      |                                                                     |
| <i>Group vs individual</i>           | 2 or 4-5 dyads                                                                                                                                | 80% grp, 20% individual                                                            | All individual                                                                       | 70% grp, 30% individual                                             |
| <i>Duration of intervention</i>      | 12 months                                                                                                                                     | 11 months                                                                          | 12 months                                                                            | 3 months                                                            |
| <i>Average length of sessions</i>    | 50 mins                                                                                                                                       | 1 hr                                                                               | 1 hr                                                                                 | 8 hrs (full creche day)                                             |
| <i>Number of sessions</i>            | 25                                                                                                                                            | 55                                                                                 | 24                                                                                   | 75                                                                  |
| <i>Freq. of contacts per month</i>   | 2                                                                                                                                             | 3                                                                                  | 2                                                                                    | 25                                                                  |
| <i>Materials</i>                     | Play materials                                                                                                                                | Books, puzzles, images, and toys (recyclable materials)                            | Books, puzzles, images and toys (recyclable materials)                               | Play materials, blocks, puzzles, big picture books, toys (low cost) |
| <i>Curriculum</i>                    | Adaptation of Reach Up                                                                                                                        | Adaptation of Reach Up                                                             | Adaptation of Reach Up                                                               | Thematic curriculum on school readiness skills                      |
| <i>Use of digital media</i>          | None                                                                                                                                          | None                                                                               | None                                                                                 | None                                                                |
| <i>Mechanism of behaviour change</i> | <i>Mentoring</i>                                                                                                                              | Yes                                                                                | Yes                                                                                  | Yes                                                                 |
|                                      | <i>Problem-solving</i>                                                                                                                        | Yes                                                                                | Yes                                                                                  | -                                                                   |
|                                      | <i>Didactic</i>                                                                                                                               | -                                                                                  | -                                                                                    | -                                                                   |
|                                      | <i>Demonstrations</i>                                                                                                                         | Yes                                                                                | Yes                                                                                  | Yes                                                                 |
|                                      | <i>Service mapping</i>                                                                                                                        | -                                                                                  | -                                                                                    | -                                                                   |
|                                      | <i>Empowerment</i>                                                                                                                            | Yes                                                                                | Yes                                                                                  | Yes                                                                 |
|                                      | <i>Peer support</i>                                                                                                                           | Yes                                                                                | Yes                                                                                  | -                                                                   |
|                                      | <i>Media</i>                                                                                                                                  | -                                                                                  | -                                                                                    | -                                                                   |
| <i>Materials</i>                     | Yes                                                                                                                                           | -                                                                                  | Yes                                                                                  | -                                                                   |
| <b>Published references</b>          | (23, 27, 28)                                                                                                                                  | (23, 29)                                                                           | (23, 29)                                                                             | (23, 30)                                                            |

CDA=Child Development Agents, CHW=Community Health Worker

## Human resources in ECD projects: themes and sub-themes

Three major human resources themes and eleven sub-themes were identified (Table 1).

### 1. Characteristics / selection of workers

Variation in workforce across the Saving Brains portfolio is summarised in Figure 3. The use of health or associate health professionals, such as community health workers, was common. Health professionals commonly delivered projects that included health and nutrition domains (Figure 3a). Lay community members were also common as frontline workers across all project types.

Integrating ECD projects into existing programmes was identified by informants as a key challenge.

*"Early child development is harder than anything because of its integrated nature.... ..we all decided that services had to be fully integrated....and this has imposed an operational burden that is very complicated."* – Saving Brains TTS project lead

1  
2  
3 Approximately one third of workers (34% n=11/32) had either only primary school-level or  
4 no education (Figure 3b). Tertiary-level education of workers was more common for RCEL  
5 projects which included health and nutrition domains (42%, n=5) (Figure 3b), likely reflecting  
6 the greater representation of healthcare professionals delivering these integrated  
7 interventions.  
8  
9

10  
11  
12  
13 Soft skills including interpersonal and communication skills were identified as important by  
14 project leads.  
15  
16

17  
18 *"We have learned a lot about the type of person that can fill the health promoter role. It*  
19 *is important that he/she is committed to the project, responsible, and loves working with*  
20 *kids, especially this age group."* – Saving Brains Seed project lead  
21  
22

23  
24 *"Having a champion in the field is crucial for success...combination of strength and*  
25 *kindness; excellent interpersonal skills; problem solver; works with all stakeholders."* –  
26 Saving Brains TTS project lead  
27  
28  
29

30  
31 A key choice in ECD implementation was whether to use established or novel cadres of  
32 worker. In some projects, novel cadres of worker were recruited to support quality of  
33 implementation. However, limitations of this approach were acknowledged with regards to  
34 sustainability.  
35  
36  
37

38  
39 *"...even after identifying and training them there is no assurance that the government*  
40 *will take up the process."* – Saving Brains TTS project lead  
41  
42  
43

44  
45 Conversely, while a number of projects used pre-existing frontline workers, key informants  
46 also expressed concerns regarding direct control over recruitment, incentivisation,  
47 supervision, and training when shared with a partner organisation (Web Appendix Table D,  
48 ICDDR,B & USP). The increased burden, change in focus, and challenge in coordination for  
49 pre-existing salaried workers was also highlighted by experts and project teams.  
50  
51  
52

53  
54 *"It's a big challenge...you take a health worker and add a 24<sup>th</sup> task to her 23<sup>rd</sup> task,*  
55 *which are requested by six different funders with no coordination between any of*  
56 *them."* - ECD Lead for an International NGO  
57  
58  
59  
60

1  
2  
3                   *"They think [to themselves], 'I'm dealing with dengue and Zika and you expect me to*  
4                   *play with a child for an hour.'"* – Saving Brains TTS project lead  
5  
6  
7

## 8   2. *Provision of incentives based on performance (inducement)*

9

10 Overall, most (61%) project workers were salaried (Figure 3c). However, considering lay  
11 community member workers only, 20% of projects offered no incentives, and a further 20%  
12 offered only a contribution to expenses (Figure 3c). Key informants expressed a range of  
13 opinions about remuneration of community health workers. Some cited elevated status  
14 within the community and personal satisfaction as a non-financial incentivisation. In contrast,  
15 concerns were expressed regarding sustainability and human rights implications of  
16 implementation models that relied on voluntary workers, who were often socially  
17 disadvantaged women. However, all health and most allied health professionals were  
18 salaried and financial remuneration for these groups was considered a key part of  
19 inducement.  
20  
21  
22  
23  
24  
25  
26  
27  
28  
29

30                   *"Asking clinic staff to conduct the sessions meant additional tasks for them and they had*  
31                   *to spend longer hours in the clinic. They therefore had expectations to be paid some*  
32                   *wages for this extra task, but our goal was to integrate the activity into their daily routine*  
33                   *hours to make it sustainable."* – Saving Brains TTS project lead  
34  
35  
36  
37

38 Staff recruitment and retention was a major recurring theme. Of the 2,572 workers recruited  
39 to deliver ECD interventions across the Saving Brains RCEL projects, 2,433 (95%) completed  
40 initial training and, of those trained, 2,165 (84%) ultimately delivered the intervention (Figure  
41 3d). Across the portfolio, retention was most challenging amongst salaried staff who were  
42 mostly health staff with 67% of salaried workers trained delivering the intervention (Figure  
43 3d). Specific reasons for drop-off were not available from existing data.  
44  
45  
46  
47  
48  
49

50 During programme planning, several teams described strategies including 'over-recruitment'  
51 to allow for anticipated staff attrition.  
52  
53  
54

55                   *"In this next phase, we trained many more promoters than we needed, approximately*  
56                   *twice as many as we originally needed in order to have a healthy resource base."* –  
57                   Saving Brains Seed project lead  
58  
59  
60

1  
2  
3  
4  
5  
6  
7  
8  
9  
10  
11  
12  
13  
14  
15  
16  
17  
18  
19  
20  
21  
22  
23  
24  
25  
26  
27  
28  
29  
30  
31  
32  
33  
34  
35  
36  
37  
38  
39  
40  
41  
42  
43  
44  
45  
46  
47  
48  
49  
50  
51  
52  
53  
54  
55  
56  
57  
58  
59  
60

*"It was hard to get [the staff], but we were very successful in keeping them. ... We paid them well which is something that I don't know that the government will be able to do. They also had a lot of support and a lot of training. They really appreciated all that they received from our team..."* – Saving Brains TTS project lead

### 3. Training and supervision

A wide variation in supervision frequency, duration and ratios, and training structure and duration was seen across projects (Table 3).

**Table 3:** Supervision and training of workers delivering responsive care and early learning Saving Brain projects

|                                                                      | Median      | Range  | Inter-quartile range |
|----------------------------------------------------------------------|-------------|--------|----------------------|
| <b>Number of days in training (N=31)</b>                             | 10          | 0-90   | 5-13.6               |
| <b>Number of trainees per workshop (N=31)</b>                        | 10          | 0-50   | 5-20                 |
| <b>Frequency of supervision (N=28)</b>                               | 2 per month | 0-10   | 1.5-4                |
| <b>Duration of supervision (N=27)</b>                                | 2 hours     | 0-8    | 1-4                  |
| <b>Ratio of supervisor to trainee during training session (N=20)</b> | 3:20        | 0.04-2 | 0.1-0.2              |

\*Data from Saving Brains standardised programme reporting 'Service Delivery Form'. Missing data for 1 project on number of days in training and number of trainees per workshop, 4 projects did not report on frequency of supervision and 5 projects on duration. 12 projects did not report on the ratio of supervisor to trainee.

Training and supervision emerged as major themes during qualitative analysis (Table 1). Within training, the need to not only address details of ECD curricula but also a diverse range of related issues including pedagogy, strategies for managing the emotional load of work and administrative requirements, communication skills, and problem-solving abilities were identified. Several key informants also highlighted the value of observational supervision.

*"...not only to see that content is delivered but that it is delivered in a way that parents will be responsive to."* – Saving Brains TTS project lead

The importance of flexible training and supervision protocols that were feasible for staff who had multiple roles and were likely to be sustainable with scale-up was also emphasised.

*"Ongoing training including proficiency evaluations and feedback build confidence in participating community health workers to apply the tools and methodologies to deal with mothers and children. We have learned this over the years of work with community*

1  
2  
3 *health workers and plan to systematize the work into teaching protocols as part of the*  
4 *transition to scale phase.” – Saving Brains TTS project lead*  
5  
6  
7

8 Key informants highlighted the need to develop formal structures for high-quality supportive  
9 training and supervision at all staff levels; this was particularly important in maintaining  
10 fidelity during intervention scale-up (Web Appendix Table D). In addition, discussions  
11 emphasised the importance of peer support amongst workers (Web Appendix Table D).  
12  
13  
14

## 15 16 **Curricula content: themes and sub-themes**

17

18  
19 Two major themes and seven sub-themes were identified with respect to curricula content  
20 (Table 1).  
21  
22

### 23 24 *4. Content and components*

25

26  
27 Improved understanding of the critical components of RCEL interventions was a major theme  
28 identified by key informants as crucial to sustainability and scale-up.  
29

30  
31 Many projects provided general descriptions of content (e.g. parenting programme,  
32 responsive parenting, nutrition) or the original curriculum from which their project was  
33 developed (commonly the established Jamaican ‘Reach Up’ curricula) (Table 2). (21) However,  
34 for many, the critical components were less well defined and described. Specifically, details of  
35 activities for different ages or developmental stages, child health or nutrition components,  
36 behavioural change approaches used, pedagogy, and materials were typically limited. Lack of  
37 an established and standardised framework for describing curricula content was identified by  
38 key informants as a barrier to improved reporting and understanding design factors  
39 responsible for impact.  
40  
41  
42  
43  
44  
45  
46  
47

48  
49 The importance of formative research and piloting for development and adaptation of  
50 interventions to setting was highlighted.  
51

52  
53 *“Project development is also really important...these projects are not ‘off-the-shelf’*  
54 *‘ready-to-go’.” – ECD expert*  
55  
56  
57

58 Additionally, the importance of balancing project flexibility, fidelity and content  
59 heterogeneity with clear, specific and structured curricula was emphasised.  
60



1  
2  
3  
4  
5  
6  
7  
8  
9  
10  
11  
12  
13  
14  
15  
16  
17  
18  
19  
20  
21  
22  
23  
24  
25  
26  
27  
28  
29  
30  
31  
32  
33  
34  
35  
36  
37  
38  
39  
40  
41  
42  
43  
44  
45  
46  
47  
48  
49  
50  
51  
52  
53  
54  
55  
56  
57  
58  
59  
60

*"The other determinant of success I would say is... we were able to develop a contextualized project, delivery product and processes." – Saving Brains Seed project lead*

Specific materials and activities often required guided cultural adaptation to maintain fidelity (Web Appendix Table D). However, it is important to note that key informants placed equal emphasis on behaviour change mechanisms as well as on specific curricula activities and materials.

*"Key components [were] inspiration, confidence... empathy, attachment of mothers and children to the deliverer...assessment for change." – Saving Brains Seed project lead*

##### 5. Delivery, duration and dosage

The importance of project delivery, duration and dosage emerged as a major theme in the analysis. Figure 4 summarises the method and duration of delivery of ECD interventions. The proportion using groups to deliver the intervention was highest amongst standalone RCEL projects and lowest amongst integrated approaches (Figure 4a). Duration of sessions generally lasted longer for groups than individual visits (Figure 4b).

ECD investigators reported that the decision regarding group or individual delivery approach was influenced more by context, efficiency, and feasibility than effectiveness.

*"Our problem...was trying to do something that we thought was evidence based, but that was not a good fit with the socio-political structures and the way people are comfortable in trying new things." – Saving Brains Seed project lead*

Key informants highlighted 'dosage' of the intervention as an important design decision. The median number of project sessions delivered, length of sessions, and length of intervention, ranged broadly (Table 4).

**Table 4:** Summary of project sessions including duration and intensity amongst responsive care and early learning Saving Brain projects (n=32)

|  | Median | Range | Inter-quartile range |
|--|--------|-------|----------------------|
|--|--------|-------|----------------------|

|                                            |             |                 |                |
|--------------------------------------------|-------------|-----------------|----------------|
| <b>Number of project sessions (N=29)</b>   | 24 sessions | 2-192 sessions  | 11-37 sessions |
| <b>Total length of intervention (N=26)</b> | 12 months   | 1-24 months     | 8-12 months    |
| <b>Length of sessions (N=26)</b>           | 1 hour      | 10 mins-8 hours | 45-90 minutes  |

Data from Saving Brains standardised programme reporting 'Service Delivery Form'. Missing data on number of project sessions for three projects, and on total length of intervention and length of sessions for six projects.

The majority (60%, n=19) of projects were primarily targeted at the child or caregiver level as opposed to targeting families or the community more broadly. Geographical, political and economic factors were important in engaging target populations.

*"...some mothers find it difficult to come to the clinics for the fortnightly sessions. The reasons were lack of time, distance from the clinic, not allowed by the father or grandparents of the child and occasionally travelling outside the area."* – Saving Brains

TTS project lead

Project teams used a range of methods to incentivise caregivers to attend sessions. One TTS team trialled both provision of oil supplementation and 'motivational meetings' (Table 2, ICDDR,B); both methods were found to be effective but motivational meetings were adopted due to sustainability.

## DISCUSSION

This is the first paper to report on workforce data from a large multi-country child development portfolio, including 32 RCEL projects with 2,165 workers delivering interventions across 17 LMIC. This analysis addresses human resources and curricula content for implementation at scale; it is noted that these factors do not stand in isolation but interact with each other and other programme design factors as well as with local contexts. *Radner et al.*'s exploration of the Saving Brains portfolio highlighted that workforce decisions around delivery of RCEL programmes can have substantial bearings on programme sustainability and impact. In this paper, we built on this to further probe specifics of workforce choices in ECD programme implementation, particularly from a health sector perspective.<sup>(13, 23)</sup> Resultant themes and sub-themes resonate with and extend existing literature regarding workforce choices, particularly the community health workforce, for programme implementation in LMIC settings.

1  
2  
3 Workforce factors are one of the most critical impediments to implementation at scale. This  
4 is well recognised for ECD programmes, especially given intersectoral complexities. Our  
5 results suggest that whilst challenges exist for integrating ECD into existing services,  
6 introducing novel cadres of worker for standalone ECD programmes may be also challenging  
7 at scale. Within this analysis, challenges related to adding ECD workstreams to the existing  
8 workload of established frontline workers were clearly reported and may have contributed to  
9 poorer retention of salaried health workers, alongside rotation of health workers. This finding  
10 has been mirrored across the implementation literature in other areas of global health; for  
11 example, an economic analysis of community based maternal and newborn care across  
12 seven countries highlighted trade-offs between improved cost-effectiveness associated with  
13 use of existing multipurpose workers and difficulties related to overburdening those  
14 workers.(31-35)

15  
16 Ongoing supportive supervision, not just initial training, was found to be crucial to  
17 intervention quality and fidelity, as has been found in global health more broadly. For  
18 example, quality supervision was emphasised as central to preservation of project quality as  
19 well as worker motivation in the economic analysis of maternal and newborn care mentioned  
20 above, and was examined in more detail in several of these evaluations, including the cluster  
21 randomised controlled Goodstart (III) trial of maternal and newborn care in South Africa.(32,  
22 36) Similarly, supervision and training, and particularly the potential of e-supervision/training,  
23 were highlighted as key concerns for project feasibility in a review of interventions for  
24 children with intellectual disabilities (37) and additionally were found to be critical for  
25 sustainable scale and impact in similar studies, such as PRIME (Programme for Improving  
26 Mental Health Care) and a follow-up study of a cluster randomized trial of a psychosocial  
27 ECD project in Colombia.(33, 38, 39)

28  
29 The challenge of retention of workers emerged as an important theme and is also not  
30 isolated to ECD. Within the Saving Brains portfolio, strategies used to mitigate against poor  
31 retention echoed findings in other global health implementation research including; over-  
32 recruitment, fast-track training, and provision of high-quality training and supervision.(33, 36,  
33 39) *Andrew et al* suggest designing interventions according to geographical practicalities and  
34 other contextual factors to mitigate staff turnover, and thus optimise project quality and  
35 impact.(38) There is appetite for shared learning to help tackle the human resource

1  
2  
3 challenges highlighted in this paper, and resources such as the Early Childhood Workforce  
4 Initiative provide a useful platform for ECD policymakers and programmers globally to work  
5 together.(40, 41)  
6  
7  
8

9  
10 Regarding essential ECD intervention curricula and components for scale-up, commonalities  
11 were seen amongst the larger TTS projects which add to previous literature on this topic.(3,  
12 14) However, there is no agreed standard package for ECD set out by the UN, contributing to  
13 project heterogeneity and precluding clear guidance for policymakers and programmers on  
14 ECD intervention content. This lack of standardised content is in contrast to more biomedical  
15 programmes, such as antenatal and postnatal care packages, as well as broader mental  
16 health and nutrition programmes which, though similar to ECD in their intersectoral nature,  
17 do have some standardised content, such as the World Health Organization and UNICEF's  
18 Infant and Young Child Feeding approach.(31, 42, 43) While lack of description of  
19 intervention content in this portfolio hinders specific recommendations for a standardised  
20 ECD curricula, our findings suggest that the focus of a standardised ECD curricula should be  
21 on engaging parents in activities which promote development, rather than providing  
22 information on developmental milestones, as is seen in many countries.  
23  
24  
25  
26  
27  
28  
29  
30  
31  
32  
33

34 Even with a standard package, contextualisation would be important, and our findings  
35 underline the need for formative research. Across the Saving Brains portfolio, there was a  
36 noticeable lack of in-depth description of curricula content, despite key informants  
37 highlighting this as important for sustainability.(14, 15) A framework for describing  
38 contextualised content of RCEL projects using, for example, parameters described by *Aboud*  
39 *et al* (information, performance, problem-solving, social support, materials and media) would  
40 provide clarity in the literature and strengthen programme comparison and evaluation.(14,  
41 44) Further, as the Nurturing Care Framework proposes, delineating ECD programmes more  
42 clearly into universal, targeted, and indicated packages to respond to the specific needs of  
43 children at particular developmental risk or with developmental disabilities would support  
44 better inclusion of children who otherwise risk not being reached by universal or  
45 conventional service models.(7, 45-47) As *Boggs et al* highlight, improved developmental  
46 monitoring is critical, and ECD workers have a vital role to play in identifying the young  
47 children most at risk of developmental difficulty and referring for ECD intervention, as well as  
48 in intervention delivery.(21) While there is little published literature on early intervention to  
49  
50  
51  
52  
53  
54  
55  
56  
57  
58  
59  
60

1  
2  
3 improve health and developmental outcomes for children with disabilities in LMIC, trials are  
4 underway and emerging models that have been adapted and that are being trialled in the  
5 context of the Zika epidemic may be informative.(48, 49)  
6  
7  
8  
9

10 Regarding delivery strategy, group sessions were frequently favoured across the Portfolio,  
11 notably based on increased practicality, efficiency, and acceptability, rather than increased  
12 effectiveness.(23) Previous evidence for both ECD and health programmes supports the use  
13 of a combination of home visits and group sessions as more effective in terms of information  
14 consolidation and parental behavioural change.(8, 14, 50) Future ECD research would benefit  
15 from an alignment of outcomes, where feasible, to ensure comparability in assessment of  
16 effectiveness. Intervention dosage was variable across the Portfolio and the need for  
17 flexibility in this when adapting to different contexts, for example during implementation of  
18 the 'Reach Up' package in Brazil, frequently emerged during analysis.(51) Dosage variability  
19 was similarly reported during the Goodstart (III) trial and was attributed to contextual and  
20 workforce factors including occupation, remuneration, and community recognition of  
21 workers.(36)  
22  
23  
24  
25  
26  
27  
28  
29  
30  
31

### 32 **Strengths and Limitations**

34  
35 Many of the limitations of this evaluation are common to ECD programming more broadly.  
36 Several process-related metrics were not commonly reported including coverage, equity, and  
37 cost-effectiveness, likely influenced by the small-scale and 'proof of concept' nature of most  
38 projects.(39) The donor-facing system of data collection and reporting within the portfolio  
39 may have introduced bias, with investigators feeling obliged to report positively, however  
40 the open learning culture within the Saving Brains Platform acted to substantially reduce this.  
41 Grant awardees were selected by GCC and so projects and their aims may reflect funder  
42 priorities. The diversity in human resources and curricula content between projects made it  
43 difficult to draw conclusions for individual RCEL programme implementation from the  
44 portfolio-level evaluation outcomes. Impact data were not available for most projects at the  
45 time of the evaluation and so assessment of impact was not included. Enhancing linkages  
46 between implementation processes and impacts within this portfolio and more broadly has  
47 the potential to strengthen evidence to inform policy and programming. Additionally, while  
48 this paper describes design decisions, there was not scope to explore the reasons behind  
49  
50  
51  
52  
53  
54  
55  
56  
57  
58  
59  
60

1  
2  
3 these decisions. Exploration of these reasons may contribute to stronger and clearer  
4 evidence, policy and programming.  
5  
6

## 7 8 **CONCLUSION** 9

10 We have reported on the largest study to date of workforce and curricula content for ECD  
11 from a large and varied portfolio of 32 projects, providing a detailed description and new  
12 synthesis about implementation challenges and enablers for ECD programming. Despite  
13 heterogeneity of projects, clear themes have emerged with parallels to LMIC programmatic  
14 learning in other areas, such as global mental health and nutrition. Development of a more  
15 standardised package or planning guide for ECD programmes would mitigate some of the  
16 challenges reported here, but programmes still need to be adapted to context. Carrying out  
17 and learning from such adaptation could be supported by a common framework for  
18 describing content and delivery strategies. More systematic evaluations of implementation  
19 costs, including worker costs will be essential inputs for planning of routine ECD  
20 programmes, within and beyond the health sector. Further research investigating  
21 associations between human resource and curricula content choices and, importantly, impact  
22 is needed.  
23  
24  
25  
26  
27  
28  
29  
30  
31  
32  
33

## 34 35 **FIGURE CAPTIONS/LEGENDS** 36

37  
38 Figure 1: Project inclusion flow chart: inclusions and subsets of responsive care and early  
39 learning projects from the Saving Brains portfolio (n=39)  
40  
41

42  
43 Figure 2: Project implementation countries  
44

45  
46 6 projects (Brazil), 4 projects (India, Kenya), 3 projects (Pakistan), 2 projects (Bangladesh,  
47 Guatemala, Peru, Vietnam), 1 project (Colombia, Democratic Republic of Congo, Ethiopia,  
48 Grenada, Jamaica, Nigeria, Rwanda, Zambia, Zimbabwe), 0 projects  
49  
50

51  
52 Note: Total number of countries of implementation >32 as one project implemented in 3  
53 countries  
54  
55

56  
57 Figure 3: Occupation, incentivisation, qualification and retention of frontline workers  
58 amongst Saving Brains portfolio responsive care and early learning (RCEL) projects  
59  
60

1  
2  
3 a) Occupation of frontline worker delivering responsive care and early learning (RCEL)  
4 projects by type of RCEL intervention project. (N=32 projects)  
5  
6

7  
8 No missing data (N=32 projects). Figures on bars represent number of projects.  
9

10 Other' =teaching professionals, social work professionals, personal care workers and  
11 combinations of occupation types.  
12  
13

14 b) Reported level of education / qualification of frontline workers across all responsive care  
15 and early learning (RCEL) projects (N=32 projects)  
16  
17

18  
19 Data reported from Service Delivery Forms which reports on the level of education or  
20 qualifications that front-line workers had (rather than what implementers felt that they  
21 needed). No missing data.  
22  
23

24  
25 c) Incentivisation of front-line workers delivering responsive care and early learning (RCEL)  
26 projects according to cadre of worker (N=25 projects)  
27  
28

29  
30 Total 'n' is greater than number of projects included (N=25) as several projects used more  
31 than one occupation as workers. Piece rate=any irregular payment where pay is per task  
32 rather than fixed salary payment.  
33  
34

35  
36 d) Retention of worker amongst responsive care and early learning (RCEL) projects according  
37 to method of incentivisation (N=29 projects)  
38  
39

40  
41 Data reported from the Results-based Management and Analysis Framework (Web Annex  
42 Table A) reported from each project. Missing data from 3 projects. Piece rate=any irregular  
43 payment where pay is per task rather than fixed salary payment.  
44  
45

46  
47  
48 Figure 4: Method and duration of delivery of intervention curricula amongst Saving Brains  
49 portfolio responsive care and early learning (RCEL) projects  
50

51  
52 a) Method of project delivery: group vs individual by type of RCEL intervention project (N=31  
53 projects)  
54  
55

56  
57  
58 Missing data from 1 project.  
59  
60

1  
2  
3 b) Median duration of project sessions comparing projects delivering curricula in group vs  
4  
5  
6 individual sessions by type of RECL intervention project (N=26 projects)  
7

8  
9 Missing data from 6 projects.  
10

## 11 **AUTHOR CONTRIBUTIONSHIP STATEMENT**

12  
13  
14 The first draft of the paper was undertaken by CJT, MKL and VPH. Other specific  
15 contributions were made by RB, SB, AB, VC, EG, JH, RH, KM, KMM, JR, SS, KS, and JEL. All  
16 authors reviewed and agreed on the final manuscript.  
17  
18  
19

## 20 **ACKNOWLEDGEMENTS**

21  
22  
23 We thank all the investigators, participants and researchers involved in projects included in  
24 the Saving Brains portfolio and evaluation. We thank Grand Challenges Canada as funder of  
25 unpublished data. We thank the Expert Advisory Group (Pia Britto, Tarun Dua, EG, Sally  
26 Grantham-McGregor, Melissa Gladstone, JH, RH, KM, JR, Muneera Rasheed, KS, Arjun  
27 Upadhyay) for their guidance; and we are grateful to Claudia da Silva for administrative  
28 assistance.  
29  
30  
31  
32  
33  
34

## 35 **COMPETING INTERESTS**

36  
37  
38 No competing interests.  
39

## 40 **FUNDING**

41  
42  
43 This paper has been made possible by funding support from the Bernard van Leer  
44 Foundation. The Saving Brains impact and process evaluation was funded by Grand  
45 Challenges Canada. Grand Challenges Canada is funded by the Government of Canada.  
46  
47  
48  
49

## 50 **DISCLAIMER**

51  
52  
53 The authors alone are responsible for the views expressed in this article and they do not  
54 necessarily represent the views, decisions or policies of the institution with which they are  
55 affiliated.  
56  
57  
58

## 59 **Data sharing**



1  
2  
3 Supplementary data have been published online and may also be accessed by emailing  
4 cally.tann@lshtm.ac.uk.  
5  
6  
7  
8  
9  
10  
11  
12  
13  
14  
15  
16  
17  
18  
19  
20  
21  
22  
23  
24  
25  
26  
27  
28  
29  
30  
31  
32  
33  
34  
35  
36  
37  
38  
39  
40  
41  
42  
43  
44  
45  
46  
47  
48  
49  
50  
51  
52  
53  
54  
55  
56  
57  
58  
59  
60

For peer review only

## REFERENCES

1. United Nations. Sustainable Development Goals 2015.
2. Every Woman Every Child. The Global Strategy for Women's, Children's and Adolescents' Health (2016-2030). 2015.
3. Daelmans B, Black M, Lombardi J, Lucas J, Richter L, Silver K, et al. Effective interventions and strategies for improving early child development. *BMJ*. 2015;351:h4029.
4. Yousafzai A, Obradović J, Rasheed M, Rizvi A, Portilla X, Tirado-Strayer N, et al. Effects of responsive stimulation and nutrition interventions on children's development and growth at age 4 years in a disadvantaged population in Pakistan: a longitudinal follow-up of a cluster-randomised factorial effectiveness trial. *Lancet Glob Health*. 2016;4(8):e548-e58.
5. Engle P, Black M, Behrman J, Cabral de Mello M, Gertler P, Kapiriri L, et al. Strategies to avoid the loss of developmental potential in more than 200 million children in the developing world. *Lancet*. 2007;369(9557):229-42.
6. Britto P, Lye S, Proulx K, Yousafzai A, Matthews S, Vaivada T, et al. Nurturing care: promoting early childhood development. *Lancet*. 2016;389(10064):91-102.
7. World Health Organisation. Nurturing Care Framework. 2018.
8. Engle P, Fernald L, Alderman H, Behrman J, O'Gara C, Yousafzai A, et al. Strategies for reducing inequalities and improving developmental outcomes for young children in low-income and middle-income countries. *Lancet*. 2011;378(9799):1339-53.
9. Yousafzai A, Rasheed M, Daelmans B, Manji S, Arnold C, Lingam R, et al. Capacity building in the health sector to improve care for child nutrition and development. *Ann N Y Acad Sci*. 2014;1308(1):172-82.
10. Black M, Walker S, Fernald L, Andersen C, DiGirolamo A, Lu C, et al. Early childhood development coming of age: science through the life course. *Lancet*. 2016;389(10064):77-90.
11. Aboud F, Yousafzai A, Nores M. State of the science on implementation research in early child development and future directions. *Ann N Y Acad Sci*. 2018;1419(Special Issue: Implementation Research and Practice for Early Childhood Development):264-71.
12. Yousafzai A, Aboud F. Review of implementation processes for integrated nutrition and psychosocial stimulation interventions. *Ann N Y Acad Sci*. 2014;1308(1):33-45.
13. Neuman M, Kimberly J, Chua P. A Review of the Literature: early childhood care and education (ECCE) personnel in low- and middle-income countries. . Paris: UNESCO; 2015.
14. Aboud F, Yousafzai A. Global health and development in early childhood. *Ann Rev Psychol*. 2015;66:433-57.
15. Frongillo E, Tofail F, Hamadani J, Warren A, Mehrin S. Measures and indicators for assessing impact of interventions integrating nutrition, health, and early childhood development. *Ann N Y Acad Sci*. 2014;1308(1):68-88.
16. Advancing Early Child Development: from Science to Scale. *Lancet*; 2016.
17. Special Issue: Implementation Research and Practice for Early Childhood Development. In: Yousafzai A, Aboud F, Nores M, Britto P, editors. *Annals of the New York Academy of Sciences* 2018.
18. Milner K, Bernal R, Brentani A, Britto P, Dua T, Gladstone M, et al. Contextual design choices and partnerships for scaling early child development programmes. *Arch Dis Child*. 2019;104(Suppl 1):S3-12.
19. Arregoces L, Hughes R, Tann C, Ponce Hardy V, Upadhyay A, Lawn J. Accountability for funds for Nurturing Care: what can we measure? *Arch Dis Child*. 2019;104(Suppl 1):S34-42.
20. Milner K, Bhopal S, Dua T, Gladstone M, Hamadani J, Hughes R, et al. Counting outcomes, coverage and quality for early child development programmes. *Arch Dis Child*. 2019;104(Suppl 1 ):S13-21.
21. Boggs D, Milner K, Chandna J, Black M, Cavallera V, Dua T, et al. Rating early child development outcome measurement tools for routine health programme use. *Arch Dis Child*. 2019;104(Suppl 1):S22-33.
22. Cavallera V, Tomlinson M, Radner J, Coetzee B, Daelmans B, Hughes RC, et al. Scaling early child development: what are the barriers and enablers? *Arch Dis Child*. 2019;104(Suppl 1):43-50.
23. Radner J, Ferrer M, McMahon D, Shankar A, Silver K. Practical considerations for transitioning early childhood interventions to scale: lessons from the Saving Brains portfolio. *Ann N Y Acad Sci*. 2018;1419(Special issue: Implementation Research and Practice for Early Childhood Development):230-48.
24. Milner K, Kohli-Lynch M, Tann C, Lawn J, On behalf of the Expert Advisory Group and Saving Brains Platform. *Saving Brains Portfolio Impact and Process Evaluation Report*. London, United Kingdom: London School of Hygiene & Tropical Medicine; 2016.

25. Moore GF, Audrey S, Barker M, Bond L, Bonell C, Hardeman W, et al. Process evaluation of complex interventions: Medical Research Council guidance. *BMJ : British Medical Journal*. 2015;350.
26. International Standard Classification of Occupations. ISCO-08. Geneva: International Labour Office; 2012.
27. Hamadani J, Mehrin S, Tofail F, Hazan M, Huda S, Baker-Henningham H, et al. Integrating an early childhood development programme into the Bangladeshi Primary Health Care Services: A cluster randomised trial. *Lancet Glob Health*. 2018.
28. Hamadani J, Nahar B, Huda S, Tofail F. Integrating early child development programs into health and nutrition services in Bangladesh: benefits and challenges. *Ann N Y Acad Sci*. 2014;1308(1):192-203.
29. Attanasio O, Baker-Henningham H, Bernal R, Meghir C, Pineda D, Rubio-Codina M. Early Stimulation and Nutrition: the impacts of a scalable intervention. NBER Working Paper. 2018(25059).
30. Bajaj M, Sharma S. Scaling-up early childhood centres for migrant construction workers' children in India. *Early Childhood Matters*. 2016;125:74-9.
31. Lawn J, Bhutta Z, Wall S, Ptereson S, Daviaud E. Cadres, content and costs for community-based care for mothers and newborns from seven countries: implications for universal health coverage. *Health Policy Plan*. 2017;32(Special Issue (Community-based maternal & newborn care economic analysis: Multi-country analysis of costs and health systems with implications for scale up)):i1-i5.
32. Daviaud E, Owen H, Pitt C, Kerber KJ, Bianchi Jassir F, Barger D, et al. Overview, methods and results of multi-country community-based maternal and newborn care economic analysis. *Health Policy Plan*. 2017;32(Special Issue (Community-based maternal & newborn care economic analysis: Multi-country analysis fo costs and health syystems with implications for scale up)):i6-i20.
33. Mendenhall E, de Silva M, Hanlon C, Petersen I, Shidhaye R, Jordans M, et al. Acceptability and feasibility of using non-specialist health workers to deliver mental health care: Stakeholders perceptions from the PRIME district sites in Ethiopia, India, Nepal, South Africa, and Uganda. *Soc Sci Med*. 2014;118:33-42.
34. Tomlinson M, Hunt X, Rotheram-Borus M. Diffusing and scaling evidence-based interventions: eight lessons for early child development from the implementation of perinatal home visiting in South Africa. *Annals of the New York Academy of Sciences*. 2018;1419(Special Issue: Implementation Research and Practice for Early Childhood Development):218-29.
35. Black R, Taylor C, Arole S, Bang A, Bhutta Z, Chowdhury A, et al. Comprehensive review of the evidence regarding the effectiveness of community-based primary health care in improving maternal, neonatal and child health: 8. summary and recommendations of the Expert Panel. *J Glob Health*. 2017;7(1):010908.
36. Daviaud E, Nkonki L, Ijumba P, Doherty T, Lawn J, Owen H, et al. South-Africa (Goodstart III) trial: community-based maternal and newborn care economic analysis. *Health Policy Plan*. 2017;32(Special Issue (Community-based maternal & newborn care economic analysis: Multi-country analysis of costs and health systems with implications for scale up)):i53-i63.
37. Reichow B, Servili C, Taghi Yasamy M, Barbui C, Saxena S. Non-Specialist Psychosocial Interventions for Children and Adolescents with Intellectual Disability or Lower-Functioning Autism Spectrum Disorders: A Systematic Review. *PLoS Med*. 2013;10(12):e1001572.
38. Andrew A, Attanasio O, Fitzsimons E, Grantham-McGregor S, Meghir C, Rubio-Codina M. Impacts 2 years after a scalable early childhood development intervention to increase psychosocial stimulation in the home: A follow-up of a cluster randomized controlled trial in Colombia. *PLoS Med*. 2018;15(4).
39. Lund C, Tomlinson M, de Silva M, Fekadu A, Shidhaye R, Jordans M, et al. PRIME: A Programme to Reduce the Treatment Gap for Mental Disorders in Five Low- and Middle-Income Countries. *PLOS One*. 2012;9(12).
40. Early Childhood Workforce Initiative 2019 [Available from: <https://www.earlychildhoodworkforce.org/>].
41. Mitter R, Putcha V. Strengthening and Supporting the Early Childhood Workforce: Training and professional development. Washington DC: Results for Development; 2018.
42. World Health Organisation. Nutrition - Infant and young child feeding 2019 [cited 2019. Available from: [https://www.who.int/nutrition/publications/infant\\_feeding/en/](https://www.who.int/nutrition/publications/infant_feeding/en/)].
43. World Health Organisation. Mental Health 2019 [cited 2019. Available from: [https://www.who.int/mental\\_health/en/](https://www.who.int/mental_health/en/)].
44. Yousafzai A, Rasheed M, Siyal S. Integration of parenting and nutrition interventions in a community health program in Pakistan: an implementation evaluation. *Ann N Y Acad Sci*. 2018;1419(Special Issue: Implementation Research and Practice for Early Childhood Development):160-78.
45. Yousafzai A, Lynch P, Gladstone M. Moving beyond prevalence studies: screening and interventions for children with disabilities in low-income and middle-income countries. *Arch Dis Child*. 2014;99(9):840-8.

- 1  
2  
3 46. Kuper H, Smythe T, Duttine A. Reflections on Health Promotion and Disability in Low and Middle-  
4 Income Countries: Case Study of Parent-Support Programmes for Children with Congenital Zika Syndrome. *Int J*  
5 *Environ Res Public Health*. 2018;15(3).  
6 47. Zuurmond M, Nyanta G, Baltussen M, Seeley J, Abanga J, Shakespeare T, et al. A support programme  
7 for caregivers of children with disabilities in Ghana: Understanding the impact on the wellbeing of caregivers.  
8 *Child Care Health Dev*. 2018;45(1):45-53.  
9 48. Benfer K, Novak I, Morgan C, Whittingham K, Khan N, Ware R, et al. Community-based parent-  
10 delivered early detection and intervention programme for infants at high risk of cerebral palsy in a low-  
11 resource country (Learning through Everyday Activities with Parents (LEAP-CP): protocol for a randomised  
12 controlled trial. *BMJ Open*. 2018;8.  
13 49. ISRCTN Current Controlled Trials [Internet]. Improving early detection and intervention for young  
14 infants at high risk of neurodevelopmental delay and disability in Uganda London: BioMed Central; 2018 Nov  
15 22 [cited 2018 Dec 12]. Available from: <http://www.isrctn.com/ISRCTN44380971>.  
16 50. Rockers P, Barnighausen T. Interventions for hiring, retaining and training district health systems  
17 managers in low- and middle-income countries. *Cochrane Database Syst Rev*. 2013;4:CD009035.  
18 51. Smith J, Baker-Henningham H, Brentani A, Mugweni R, Walker S. Implementation of Reach Up early  
19 childhood parenting program: acceptability, appropriateness, and feasibility in Brazil and Zimbabwe. *Ann N Y*  
20 *Acad Sci*. 2018;1419(Special Issue: Implementation Research and Practice for Early Childhood Development):1-  
21 21.  
22  
23  
24  
25  
26  
27  
28  
29  
30  
31  
32  
33  
34  
35  
36  
37  
38  
39  
40  
41  
42  
43  
44  
45  
46  
47  
48  
49  
50  
51  
52  
53  
54  
55  
56  
57  
58  
59  
60

Figure 1: Project inclusion flow chart: inclusions and subsets of responsive care and early learning projects from the Saving Brains portfolio (n=39)

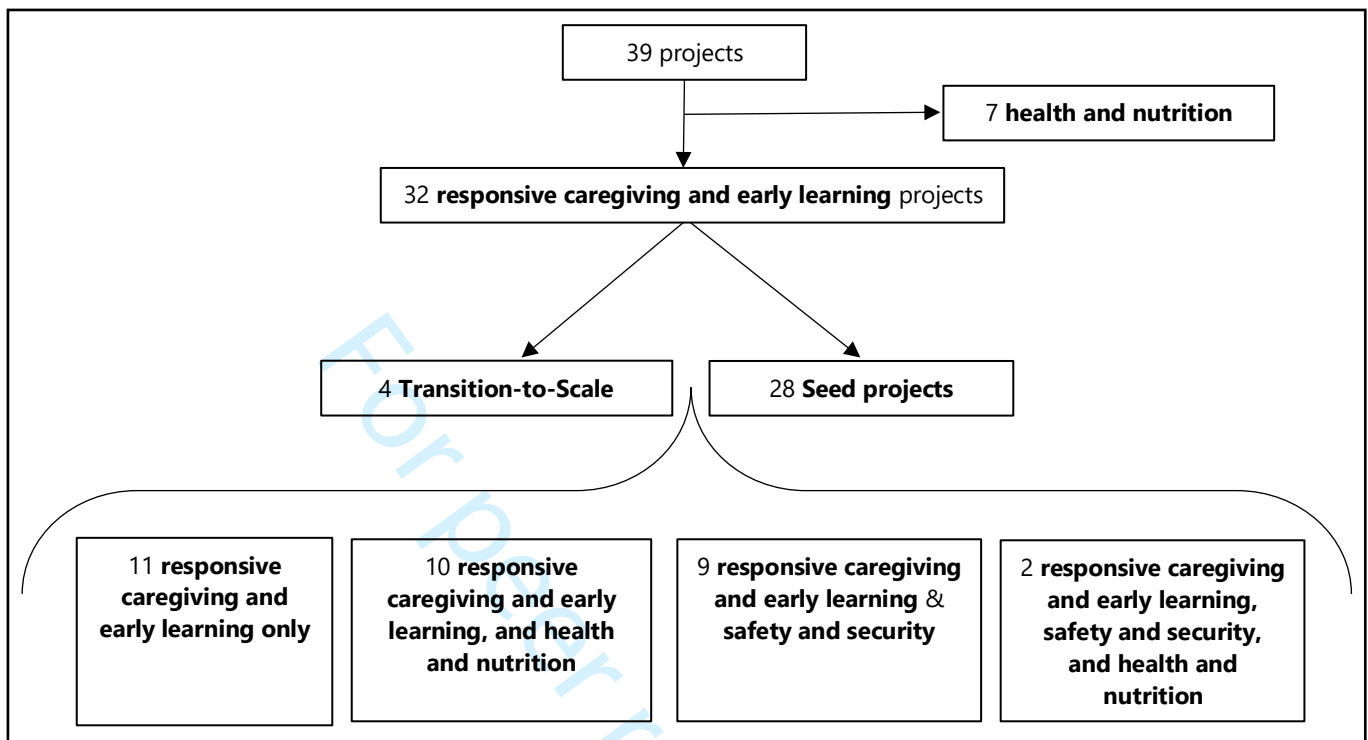

1  
2  
3  
4  
5  
6  
7  
8  
9  
10  
11  
12  
13  
14  
15  
16  
17  
18  
19  
20  
21  
22  
23  
24  
25  
26  
27  
28  
29  
30  
31  
32  
33  
34  
35  
36  
37  
38  
39  
40  
41  
42  
43  
44  
45  
46  
47  
48  
49  
50  
51  
52  
53  
54  
55  
56  
57  
58  
59  
60

**Figure 2: Project implementation countries**



- 6 projects (Brazil)
- 4 projects (India, Kenya)
- 3 projects (Pakistan)
- 2 projects (Bangladesh, Guatemala, Peru, Vietnam)
- 1 project (Colombia, Democratic Republic of Congo, Ethiopia, Grenada, Jamaica, Nigeria, Rwanda, Zambia, Zimbabwe)
- 0 projects

Note: Total number of countries of implementation >32 as one project implemented in 3 countries

**Figure 3: Occupation, incentivisation, qualification and retention of frontline workers amongst Saving Brains portfolio responsive care and early learning (RCEL) projects**

a) Occupation of frontline worker delivering responsive care and early learning (RCEL) projects by type of RCEL intervention project. (N=32 projects)

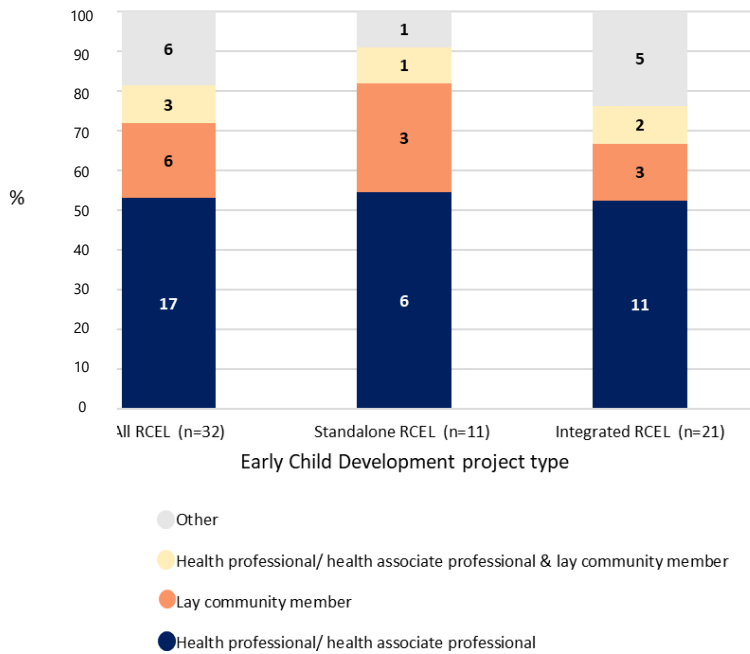

b) Reported level of education / qualification of frontline workers across all responsive care and early learning (RCEL) projects (N=32 projects)

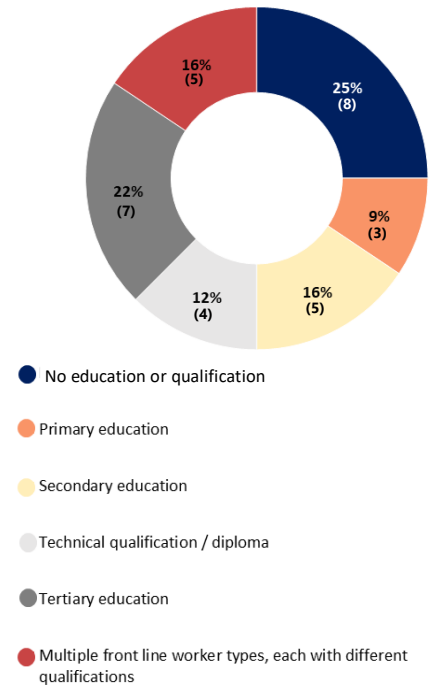

No missing data (N=32 projects). Figures on bars represent number of projects. 'Other'=teaching professionals, social work professionals, personal care workers and combinations of occupation types.

Data reported from Service Delivery Forms which reports on the level of education or qualifications that front-line workers had (rather than what implementers felt that they needed). No missing data.

c) Incentivisation of front-line workers delivering responsive care and early learning (RCEL) projects according to cadre of worker (N=25 projects)

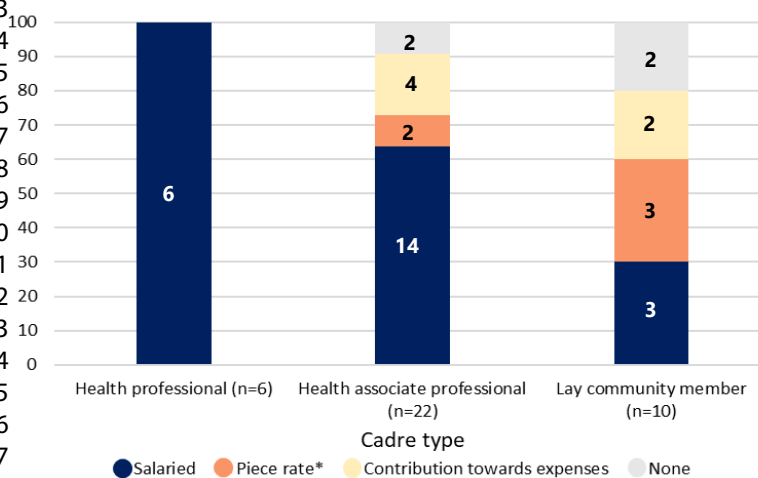

d) Retention of worker amongst responsive care and early learning (RCEL) projects according to method of incentivisation (N=29 projects)

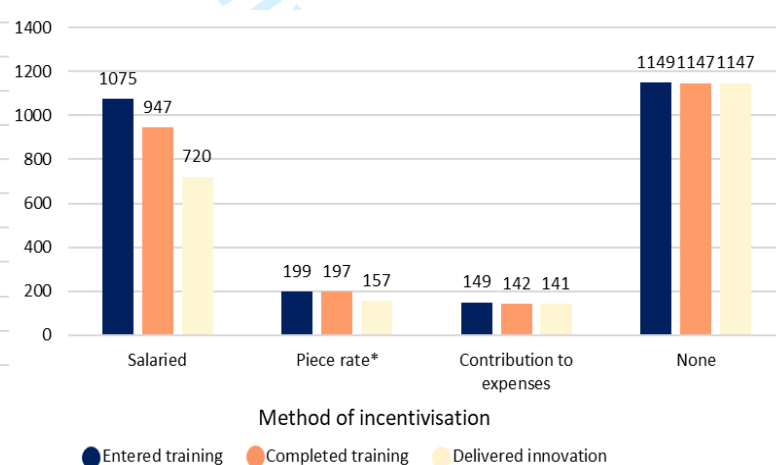

Total 'n' is greater than number of projects included (N=25) as several projects used more than one occupation as workers. Piece rate=any irregular payment where pay is per task rather than fixed salary payment.

Data reported from the Results-based Management and Analysis Framework (Web Annex Table A) reported from each project. Missing data from 3 projects. Piece rate=any irregular payment where pay is per task rather than fixed salary payment.

**Figure 4: Method and duration of delivery of intervention curricula amongst Saving Brains portfolio responsive care and early learning (RCEL) projects**

a) Method of project delivery: group vs individual by type of RCEL intervention project (N=31 projects)

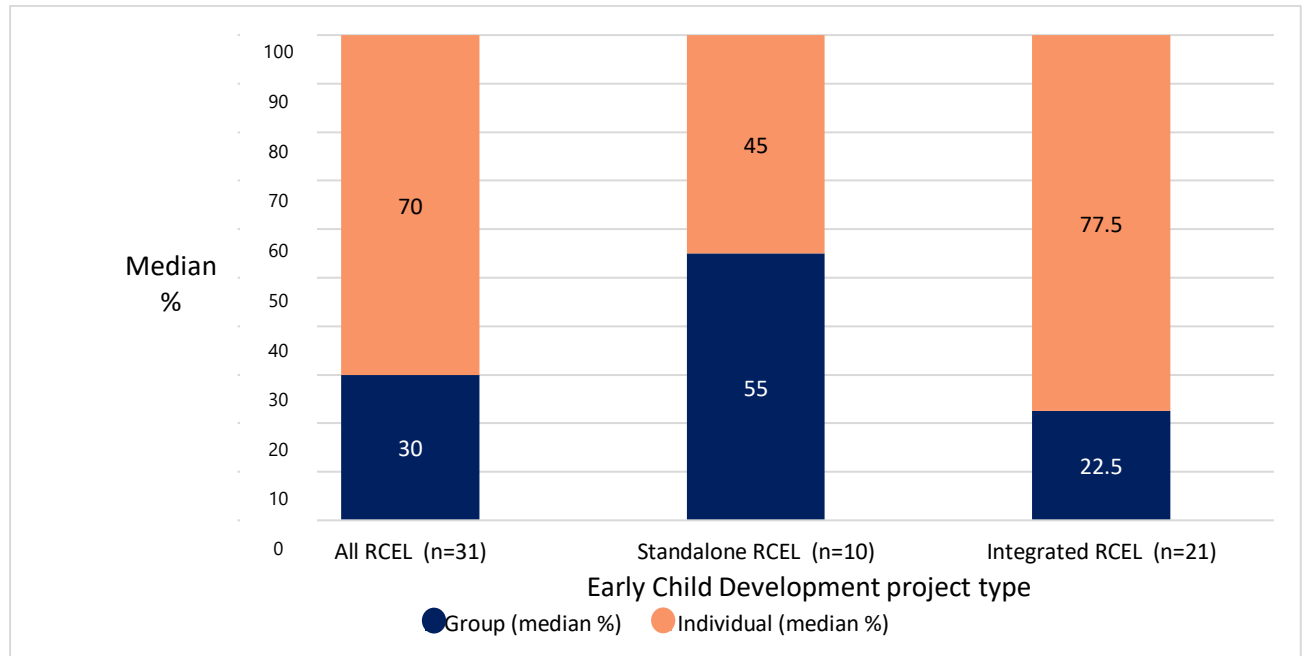

Missing data from 1 project.

b) Median duration of project sessions comparing projects delivering curricula in group vs individual sessions by type of RECL intervention project (N=26 projects)

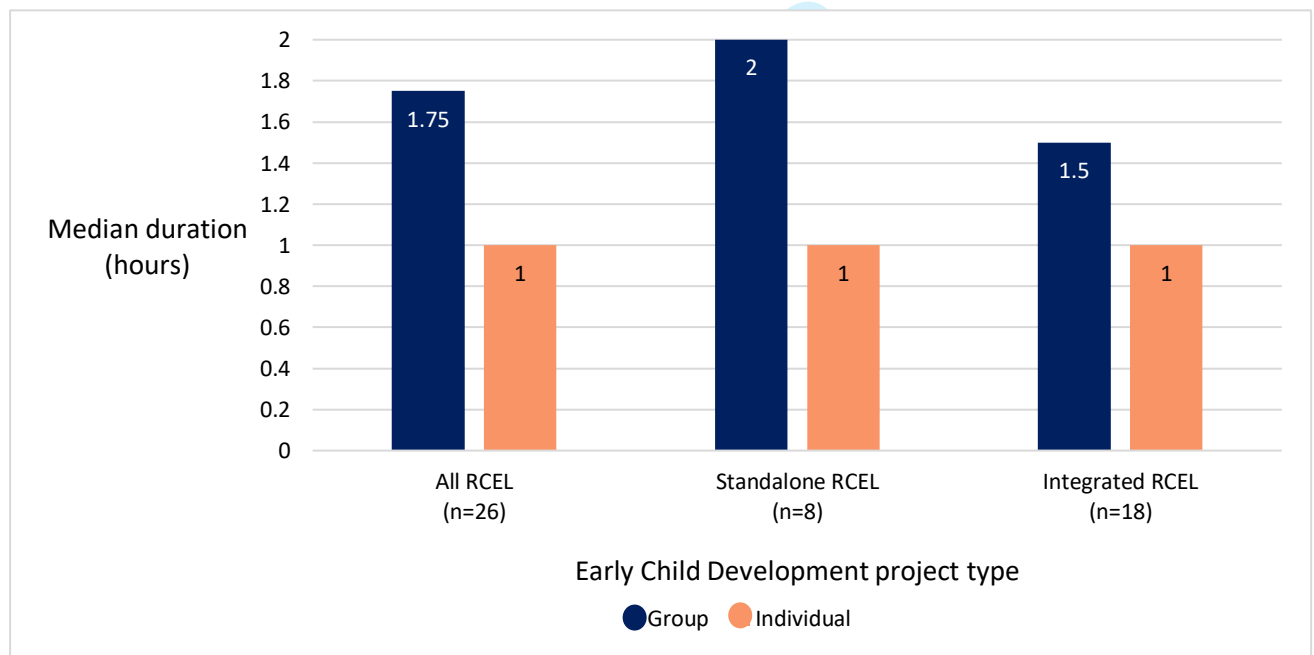

Missing data from 6 projects.



Web Appendix Figure A: Portfolio Conceptual Evaluation Framework



LMICs = Low- and middle-income countries

Seed grants focused on demonstration of 'proof of concept' over 18-24 months.

Transition to scale grants focused on progression towards scale in partnership with other organisations over 3 years.

Web Appendix Figure B: Saving Brains portfolio level Theory of Change



SB=Saving Brains

Note: Theory of Change was developed by Grand Challenges Canada Saving Brains platform members [about/guidelines.xhtml](https://www.gccanada.ca/saving-brains/about/guidelines.xhtml)

Web Appendix Table A: Data sources utilised for the Saving Brains portfolio evaluation

| Data Source                                                         | Description                                                                                                                                                                                             | Timing of data collection                                                                  | Organisation receiving data                          | Data type                  | Number of data source items                              |
|---------------------------------------------------------------------|---------------------------------------------------------------------------------------------------------------------------------------------------------------------------------------------------------|--------------------------------------------------------------------------------------------|------------------------------------------------------|----------------------------|----------------------------------------------------------|
| <b>Service delivery forms</b>                                       | Document completed by grantees used to collect projected, interim and/or final and quantitative information on workforce and intervention delivery                                                      | Yearly                                                                                     | Grand Challenges Canada                              | Quantitative & Qualitative | 32<br>(Endpoint service delivery forms)                  |
| <b>Results-based Management and Accountability Framework (RMAF)</b> | Framework completed by grantee which facilitates the collection of data and comparison of results around core metrics                                                                                   | Six-monthly                                                                                | Grand Challenges Canada                              | Quantitative & Qualitative | 7                                                        |
| <b>RMAF+</b>                                                        | Framework completed by grantee developed from the original RMAF and Theory of Change containing more detailed metrics on impact, process and context of innovations (Round 3 onwards)                   | Six-monthly                                                                                | Grand Challenges Canada                              | Quantitative & Qualitative | 25                                                       |
| <b>Progress reports</b>                                             | Narrative reports completed by grantees detailing project progression, challenges, lessons learned, results, dissemination and next steps                                                               | Six-monthly                                                                                | Grand Challenges Canada                              | Qualitative                | 32                                                       |
| <b>Research proposals</b>                                           | Proposal of innovation design completed by potential grantees                                                                                                                                           | Point of application for grant                                                             | Grand Challenges Canada                              | Qualitative                | 32                                                       |
| <b>Saving Brains community meeting transcripts</b>                  | Transcripts from discussions between grantees and platform members at two Saving Brains community meetings                                                                                              | 21 <sup>st</sup> -22 <sup>nd</sup> Jun 2016<br>25 <sup>th</sup> -26 <sup>th</sup> Oct 2016 | London School of Hygiene & Tropical Medicine (LSHTM) | Qualitative                | 2                                                        |
| <b>Key informant interviews</b>                                     | Key informants, including Saving Brains project leads, identified through professional networks and approached for interview on relevant themes                                                         | Jun-Oct 2016                                                                               | World Health Organization & LSHTM                    | Qualitative                | 19                                                       |
| <b>Grantee interviews</b>                                           | Grantees identified by LSHTM and platform members for thematic discussion                                                                                                                               | Jul-Sept 2016                                                                              | LSHTM<br>Qualitative                                 | Qualitative                | 21                                                       |
| <b>Focus group discussions</b>                                      | Grantees selected and invited to focus group discussions, either online or during Saving Brains community meetings, on workforce choices, supervision and training, and monitoring quality and coverage | Jun-Oct 2016                                                                               | LSHTM                                                | Qualitative                | 13<br><br>(4-10 participants per focus group discussion) |

Web Appendix Table B: Interview and focus group topic guides from Saving Brains evaluation

| <b>Thematic questions for key informant interviews and focus groups (Toronto Saving Brains Community Meeting (June 21-22 2016) and webinars (August 17, 24 and September 2 2016)).</b> |                                                                                                                                                                                                                                                                                                                                                                                                                                                                                                                                                                                                                                                                                                                                                                                                                                                                                                                                                                                                                                                                                                                                                                                                                                                                                                                                 |
|----------------------------------------------------------------------------------------------------------------------------------------------------------------------------------------|---------------------------------------------------------------------------------------------------------------------------------------------------------------------------------------------------------------------------------------------------------------------------------------------------------------------------------------------------------------------------------------------------------------------------------------------------------------------------------------------------------------------------------------------------------------------------------------------------------------------------------------------------------------------------------------------------------------------------------------------------------------------------------------------------------------------------------------------------------------------------------------------------------------------------------------------------------------------------------------------------------------------------------------------------------------------------------------------------------------------------------------------------------------------------------------------------------------------------------------------------------------------------------------------------------------------------------|
| <b>Impact and outcome metrics question guide</b>                                                                                                                                       |                                                                                                                                                                                                                                                                                                                                                                                                                                                                                                                                                                                                                                                                                                                                                                                                                                                                                                                                                                                                                                                                                                                                                                                                                                                                                                                                 |
| <b>Background</b>                                                                                                                                                                      | Limitations of child development metrics pose a major challenge in policy and programming efforts to improve early child development outcomes in low- and middle-income country (LMIC) settings. Various initiatives are underway to improve measurement of outcomes at population and individual level (e.g. newly published data from McCoy <i>et al</i> , funded by the Saving Brains® Programme, Grand Challenges Canada®, providing the first global and regional estimates of the number of children failing to reach developmental milestones based on parent report measures. <sup>(1)</sup> However major challenges remain and collaboration is required to improve measurement of impact of interventions on child development outcomes at scale in low-resources settings.                                                                                                                                                                                                                                                                                                                                                                                                                                                                                                                                          |
| <b>Objectives</b>                                                                                                                                                                      | To discuss as a group; <ol style="list-style-type: none"> <li>1. Different approaches to impact measurement that have been taken across the Saving Brains portfolio</li> <li>2. Challenges and benefits of different approaches taken</li> <li>3. Lessons learned for policy makers and programmers attempting to measure impact of early child development (ECD) interventions at scale</li> </ol>                                                                                                                                                                                                                                                                                                                                                                                                                                                                                                                                                                                                                                                                                                                                                                                                                                                                                                                             |
| <b>Questions</b>                                                                                                                                                                       | <ol style="list-style-type: none"> <li>1. How has impact been measured across the Saving Brains portfolio?</li> <li>2. How were decisions reached about impact measures used? What factors influenced these decisions?</li> <li>3. How has use of these impact measures worked in practice?</li> <li>4. How about intermediary outcome measurement in terms of environment, caregiver relationships etc.?</li> <li>5. What have been the programming requirements to support this in terms of human resources, cost, timeline etc.?</li> <li>6. Have measures used required translation and adaptation in your local context and if so, how has this been managed?</li> <li>7. Do measures used include children less than 3 years and children with disabilities?</li> <li>8. Could measures used within the Saving Brains portfolio be used if innovations were scaled up at National level? If so, how and what would be required to support this? If not, what alternatives would you recommend for programmers and policy makers?</li> <li>9. Given the range of players involved, how can coordination within ECD networks be improved to support development of improved metrics?</li> <li>10. Any other aspects of impact measurement that you think are important considerations which we have not covered?</li> </ol> |
| <b>Cadre question guide</b>                                                                                                                                                            |                                                                                                                                                                                                                                                                                                                                                                                                                                                                                                                                                                                                                                                                                                                                                                                                                                                                                                                                                                                                                                                                                                                                                                                                                                                                                                                                 |
| <b>Background</b>                                                                                                                                                                      | Choices around human resources for implementation of ECD interventions have significant implications for effectiveness, sustainability and scale-up. Across the Savings Brains portfolio, a broad range of workers have been used to implement innovations with potential lessons for policy makers and programmers aiming to implement ECD interventions at scale in a range of contexts.                                                                                                                                                                                                                                                                                                                                                                                                                                                                                                                                                                                                                                                                                                                                                                                                                                                                                                                                      |
| <b>Objectives</b>                                                                                                                                                                      | <ol style="list-style-type: none"> <li>1. To discuss the range of workers used to implement innovations across settings.</li> <li>2. To discuss rationale for choice of workers used across settings.</li> <li>3. To discuss programming implications with use of different cadres of workers.</li> </ol>                                                                                                                                                                                                                                                                                                                                                                                                                                                                                                                                                                                                                                                                                                                                                                                                                                                                                                                                                                                                                       |
| <b>Questions</b>                                                                                                                                                                       | <ol style="list-style-type: none"> <li>1. What was the rationale for selection of worker type across different SB innovations?</li> </ol>                                                                                                                                                                                                                                                                                                                                                                                                                                                                                                                                                                                                                                                                                                                                                                                                                                                                                                                                                                                                                                                                                                                                                                                       |

**Thematic questions for key informant interviews and focus groups (Toronto Saving Brains Community Meeting (June 21-22 2016) and webinars (August 17, 24 and September 2 2016)).**

2. What challenges and benefits were noted with use of various cadres of workers across settings?
3. Where pre-existing categories of workers were used, what were the pros and cons experienced? How was the overall workload for individual workers managed when implementing 'additional' ECD intervention?
4. Where new worker groups were used, what were the pros and cons of this approach? How were issues of financing, governance and sustainability managed?
5. How were decisions around incentivisation reached?
6. Where community health workers were used, how were decisions reached around type of community health worker, level of training, supervision, equipment and incentivisation?
7. Where community health workers were used with the goal of improving equity and coverage of interventions, were these tracked? And if so, provisional recommendations or findings?
8. When thinking about decisions at a national scale, are there additional factors that need to be considered about human resources for implementation of ECD interventions?

**Content (positive stimulation interventions) question guide**

**Background**

Available evidence provides general guidance to policy makers and programmers about elements of positive stimulation interventions associated with increased effectiveness.(2) In particular, use of a structured evidence based curriculum, provision of opportunity to practice skills with the child, provision of feedback to the parent, adequate training and supervision for staff, integrated health, nutrition and ECD elements and both community and government support are thought to be important in intervention effectiveness.(2) There are also an increasing range of resources available to programmers implementing ECD interventions.(3, 4) However, from a practical perspective programmers still face detailed choices about intervention design and pros and cons of alternate choices in different settings may not be clear.

**Objectives**

1. To consider key intervention design questions raised when implementing positive stimulation interventions across the Saving Brains portfolio.
2. To consider how choices were made around these intervention design elements.
3. To consider relevance of lessons learned to programmers developing models for ECD interventions at national scale.

**Questions**

1. Across the Saving Brains portfolio what factors have informed choices about the following elements of positive stimulation interventions;
2. Target of intervention (e.g. parent, parent and child, child only)
3. Age of children
4. Number of contacts
5. Frequency of contacts
6. Duration of contacts
7. Chosen curriculum (with as much detail re actual curriculum as possible)
8. With regards to choices made, what has worked well and why?
9. Are there areas which have not worked well and if so, please describe?
10. Are there design elements that need to change to enable scale up and if so, please provide examples?
11. Any other elements that you consider important for programmers at national level to consider when developing models for implementation at scale?

*NB That questions re universal vs targeted and integration of interventions are asked elsewhere but could also be covered here.*

**Delivery setting question guide**

**Background**

**Thematic questions for key informant interviews and focus groups (Toronto Saving Brains Community Meeting (June 21-22 2016) and webinars (August 17, 24 and September 2 2016)).**

ECD interventions are delivered in diverse settings in terms of geography, rural/urban, different sectors, facility/communities or home or often a mix of settings.  
Decisions about setting have implications for policy and on many aspects of programming.

**Objectives**

To discuss as a group;

1. How decisions about implementation setting were made across the portfolio
2. Implications of those decisions, both positive and negative on program implementation and scale-up
3. Lessons learned for policy makers and programmers designing ECD programmes at national

**Questions**

1. How were decisions about the setting for implementation of your ECD programme reached (e.g. convenience, targeting of vulnerable subgroup, prior involvement with that sector etc.)?
2. What information did you use in deciding about the setting of implementation for your program?
3. Was there any information that if you'd had it earlier, would have altered your decision about setting?
4. Benefits specific to your setting?
5. Challenges specific to your setting?
6. What implications has setting choice had on the ease of program implementation?
7. What recommendations about delivery setting would you make to policy makers and programmers designing ECD programmes at national scale?
8. Anything further that you would like to highlight about implementation setting that we have not covered so far?

**Universal and targeted approaches**

**Background**

Universal approaches to improving ECD aim to increase protective factors and reduced risks for adverse child development at a whole population level. Targeted approaches are aimed specifically at children identified as having a higher-than-population-baseline risk of adverse developmental outcomes.

While systems which provide both universal and targeted ECD interventions are ideal, in resource limited settings, some have suggested that services should initially be targeted to the most vulnerable.<sup>(5)</sup> Further, from a rights perspective, it can be argued that ensuring equity through inclusion of children with specific additional risk factors (e.g. disability, membership to ethnic minority subgroups etc.) is a priority, regardless of setting.

There are however many challenges. While effectiveness of interventions may be greatest for certain vulnerable population sub-groups, with potentially favourable 'benefit to cost ratio' for investment, scaling up services to include those 'hardest to reach' may involve higher initial costs.<sup>2</sup> These complexities pose challenges for policy makers trying to develop ECD programmes which are equitable but also provide sustainable coverage at scale.

**Objectives**

To discuss as a group;

1. The rationale for selection of targeted versus universal approaches to ECD implementation in different settings within the Saving Brains portfolio.
2. Programming implications for both approaches
3. Requirements to inform policy makers in decisions about either universal or targeted approach to implementation

**Questions**

1. What was the rationale for selection of targeted versus universal approaches to ECD implementation in your context?
2. In interventions where a targeted approach was taken, how was the target population

**Thematic questions for key informant interviews and focus groups (Toronto Saving Brains Community Meeting (June 21-22 2016) and webinars (August 17, 24 and September 2 2016)).**

identified (e.g. data driven, empirically, opportunistically)?

3. What are the benefits and disadvantages of a targeted approach in different settings?
4. What are the benefits and disadvantages of a universal approach in different settings?
5. What have been the programming implications of different approaches taken (e.g. human resources, training and supervision, financial)?
6. Have there been implications for financial sustainability and if so, moving forward, what strategies might be used to address these?
7. For interventions taking a universal approach, what strategies have been implemented to ensure inclusion of disadvantaged population subgroups including children with disabilities?
8. What recommendations about intervention targeting would you make to policy makers and programmers designing ECD programmes at national scale?
9. Anything further that you would like to highlight about implementation setting that we have not covered so far?

**Processes for monitoring coverage and quality at scale**

**Background**

Processes to ensure quality and coverage are important for effective and equitable implementation of ECD interventions.(2) However, review by Yousafzai et al has highlighted the need for further consideration of implementation processes to facilitate more comprehensive guidance as to how to effectively implement interventions.(6, 7) The Saving Brains portfolio provides a unique opportunity to consider implementation processes in order to provide more detailed guidance for programming at scale.

**Objectives**

To discuss:

1. Priorities in measuring quality and coverage of intervention.
2. Approaches used to monitor quality and coverage across the portfolio.
3. Considerations for monitoring coverage and quality of ECD interventions at scale.

**Questions**

1. What do you think are the 3 most important elements of 'quality' of implementation to measure?
2. What indicators have been most helpful in measuring these?
3. What processes of supervision and training have been developed to support this? (As much detail as possible re number of supervisors per worker, frequency, duration and mode of supervision)
4. What has been required to support monitoring of quality and coverage in terms of;
5. Data sources - are these procedures integrated into existing national data collection systems or stand-alone systems?
6. Technical and funding support?
7. Incentivisation of workers?
8. How have findings from monitoring been incorporated into ongoing implementation?
9. Would these approaches to monitoring of quality be feasible and appropriate for interventions delivered at national scale?
10. What strategies have been used to ensure equitable coverage of interventions?
11. What strategies have been used to reach the most difficult to reach populations including children with disabilities?
12. What challenges have been faced with regard to retention of participants? How have these challenges been overcome?
13. How would these approaches need modified for implementation at national scale?

**Integration**

**Background**

Integrated delivery of ECD with interventions in other sectors is often recommended to promote holistic care of children and their families, to maximise synergies of interventions and for efficiency.

**Thematic questions for key informant interviews and focus groups (Toronto Saving Brains Community Meeting (June 21-22 2016) and webinars (August 17, 24 and September 2 2016)).**

However, an integrated approach to service delivery also has many implications for programming.

**Objectives**

To consider as a group;

1. Experience with integrated innovations across the Saving Brains portfolio in terms.

**Questions**

1. What has been the rationale for choosing ECD specific or integrated ECD approaches in different settings across the portfolio?
2. Where integrated approaches have been taken, how has this worked?
3. What have been the programmatic implications of an integrated approach in terms of;
4. Work-load for workers?
5. Training and supervision?
6. Equipment?
7. Cost?
8. Monitoring and evaluation?
9. How has governance across sectors been managed?
10. What are the implications of an integrated approach for implementation at national scale?
11. Are there other elements of an integrated approach which are important to consider in implementation of ECD programmes at national scale?

**Questions for experts in the field**

1. What do you consider to be priority needs for policy makers and programmers in implementing ECD programming at national scale, once a decision has been made to invest in early child development?
2. With regards to ECD programmes at scale, what do you consider to be the key design decisions for policy makers and programmers?
3. Given the challenges of measuring impact in ECD programmes and the constraints that this poses to progress in policy and planning, what do you see as next steps in improving developmental outcome metrics within programmes and at national scale?
4. If it were possible to monitor 3 indicators on the pathway to improving ECD at a national level, what would you measure and why?
5. What key lessons can be learned about cadres of worker for delivery of ECD interventions from other global child health interventions? In particular, what lessons around use of Community Health Workers (CHWs) are relevant for CHWs delivery of positive stimulation interventions in home settings?



## References

1. McCoy DC, Peet ED, Ezzati M, Danaei G, Black MM, Sudfeld CR, Fawzi W, Fink G. Early childhood developmental status in low-and middle-income countries: national, regional, and global prevalence estimates using predictive modeling. *PLoS Medicine*. 2016 Jun;13(6).
2. Engle PL, Fernald LC, Alderman H, Behrman J, O'Gara C, Yousafzai A, et al. Strategies for reducing inequalities and improving developmental outcomes for young children in low-income and middle-income countries. *Lancet*. 2011;378(9799):1339-53.
3. WHO. MEETING REPORT Nurturing human capital along the life course: Investing in early child development. 2013.
4. Jeffery C, Tanner TC, and Whitney S. Odden. Later Impacts of Early Childhood Interventions: A Systematic Review. 2015.
5. Sayre RK, Denboba, A.D., Lombardi, J., Elder, L.K., Rawlings, L.B. and Wodon, Q.T. Stepping up Early Childhood Development: Investing in young children for high returns. Washington DC: 2014.
6. Yousafzai AK AF. Review of implementation processes for integrated nutrition and psychosocial stimulation interventions. *Annals of the New York Academy of Sciences* 2014;1308(1):33-45.
7. Yousafzai AK, Rasheed MA, Daelmans B, Manji S, Arnold C, Lingam R, et al. Capacity building in the health sector to improve care for child nutrition and development. *Annals of the New York Academy of Sciences*. 2014;1308(1):172-82.

Web Appendix Table C: Key informants contributing to qualitative components of portfolio evaluation

|                                                                                                                                                                                                                                                   | Organisation Type/Name                                       | Position                        | Question theme                                                                       |
|---------------------------------------------------------------------------------------------------------------------------------------------------------------------------------------------------------------------------------------------------|--------------------------------------------------------------|---------------------------------|--------------------------------------------------------------------------------------|
| <b>EARLY CHILD DEVELOPMENT (ECD) POLICY AND PROGRAMMING</b>                                                                                                                                                                                       |                                                              |                                 |                                                                                      |
| 1                                                                                                                                                                                                                                                 | Saving Brains                                                | Executive                       | ECD research, policy and programming; contemporary challenges and future directions. |
| 2.                                                                                                                                                                                                                                                | Multilateral UN organisation                                 | Policy and programming.         | ECD research, policy and programming; contemporary challenges and future directions. |
| 3.                                                                                                                                                                                                                                                | Multilateral UN organisation                                 | Policy and programming.         | ECD research, policy and programming; contemporary challenges and future directions. |
| 4.                                                                                                                                                                                                                                                | Private international ECD foundation                         | Policy maker.                   | ECD research, policy and programming; contemporary challenges and future directions. |
| 5.                                                                                                                                                                                                                                                | International Financial Institution.                         | Policy maker.                   | ECD research, policy and programming; contemporary challenges and future directions. |
| 6.                                                                                                                                                                                                                                                | Multilateral non-government organisation.                    | Policy & programming.           | ECD programming, iNGO perspective on what is needed to progress the field            |
| 7.                                                                                                                                                                                                                                                | International Child Health Research Institution              | Policy, programming & research. | ECD in global child health – challenges and future directions.                       |
| 8.                                                                                                                                                                                                                                                | Non-government disability-ECD organisation - national level. | Policy and programming.         | Inclusion in ECD programming – iNGO perspective                                      |
| 9.                                                                                                                                                                                                                                                | Ministry of Health, sub-Saharan African country.             | Policy and Programming          | ECD in global child health, health perspectives.                                     |
| <b>OTHER EXPERTS IN FIELD</b>                                                                                                                                                                                                                     |                                                              |                                 |                                                                                      |
| <b>General</b>                                                                                                                                                                                                                                    |                                                              |                                 |                                                                                      |
| 10.                                                                                                                                                                                                                                               | Public health academic institution, UK                       | Senior Researcher               | Research priorities in ECD                                                           |
| 11.                                                                                                                                                                                                                                               | Public health academic institution, USA.                     | Senior Researcher.              | Challenges, priorities and approaches in future ECD research.                        |
| <b>Specific technical</b>                                                                                                                                                                                                                         |                                                              |                                 |                                                                                      |
| 12.                                                                                                                                                                                                                                               | Public health academic institution, USA.                     | Senior Researcher.              | Impact metrics                                                                       |
| 13.                                                                                                                                                                                                                                               | Public health academic institution, USA.                     | Researcher.                     | Impact metrics                                                                       |
| 14.                                                                                                                                                                                                                                               | Public health academic institution, UK                       | Senior Researcher.              | Impact metrics                                                                       |
| 15.                                                                                                                                                                                                                                               | Multilateral UN organisation.                                | Senior Researcher.              | Impact metrics                                                                       |
| 16.                                                                                                                                                                                                                                               | Saving Brains Grant Recipient Research Institution.          | Senior Researcher.              | Implementation process metrics, human resourcing.                                    |
| 17.                                                                                                                                                                                                                                               | Saving Brains Grant Recipient Research Institution.          | Senior Researcher.              | Implementation process metrics, cost-effectiveness                                   |
| 18.                                                                                                                                                                                                                                               | Saving Brains Grant Recipient Research Institution.          | Senior Researcher.              | Integration.                                                                         |
| 19.                                                                                                                                                                                                                                               | Academic Centre, USA.                                        | Senior Researcher.              | Implementation process knowledge gaps, priority questions and research methodology.  |
| <b>Saving Brains Platform</b>                                                                                                                                                                                                                     |                                                              |                                 |                                                                                      |
| Members of the Saving Brains Platform team who were consulted about various aspects of the evaluation, their experiences working within the Saving Brains portfolio and in regard to specific technical, programming and research related themes. |                                                              |                                 |                                                                                      |
| <b>Grantees</b>                                                                                                                                                                                                                                   |                                                              |                                 |                                                                                      |
| Twenty-one of thirty-nine (54%) of research teams were specifically interviewed regarding their innovation and various aspects of their experiences within the Saving Brains portfolio.                                                           |                                                              |                                 |                                                                                      |

ECD=Early Child Development

Web Appendix Table D: Saving Brains responsive care and early learning (RCEL) Transition-to-Scale projects: Summary of challenges and course correction

| Project Name                                             | Transition to scale of an integrated program of nutritional care and psychosocial stimulation to improve malnourished children's development                                                                              | An integrated intervention targeted at deprived pre-school children in rural areas                                                                                                                                                                      | Home visiting programs to improve early child development and maternal mental health                                                                                                                                                                                           | Saving Brains, Changing Mindsets                                                                                                                                                                                                                                                |
|----------------------------------------------------------|---------------------------------------------------------------------------------------------------------------------------------------------------------------------------------------------------------------------------|---------------------------------------------------------------------------------------------------------------------------------------------------------------------------------------------------------------------------------------------------------|--------------------------------------------------------------------------------------------------------------------------------------------------------------------------------------------------------------------------------------------------------------------------------|---------------------------------------------------------------------------------------------------------------------------------------------------------------------------------------------------------------------------------------------------------------------------------|
| <b>HUMAN RESOURCES: CHALLENGES AND COURSE CORRECTION</b> |                                                                                                                                                                                                                           |                                                                                                                                                                                                                                                         |                                                                                                                                                                                                                                                                                |                                                                                                                                                                                                                                                                                 |
| <i>Interaction with existing services</i>                | Integration and coordination with health services in rural Bangladesh.                                                                                                                                                    | Competition from a new government-run parenting program, ICBF.                                                                                                                                                                                          | Integration into existing family health strategy home-visits increased visit frequency but reduced number of families visited. Local workers demanded financial incentives to deliver new project and prioritized pre-existing activities.                                     | Issues encountered were gaining confidence and trust of construction companies, quality assurance of individual NGOs, securing adequate infrastructure, particularly as a decline in the construction industry slowed project progress                                          |
| <i>Adaptation for implementation</i>                     | -                                                                                                                                                                                                                         | Shift required from didactic learning to 'demonstration and practice' method of learning. Supervision forms were adapted to type of data collected.                                                                                                     | Busy schedule of Community Health Workers (CHWs) meant missed appointments were not rescheduled. Child Development Agents (CDAs) more frequently rescheduled visits. Supervision was jeopardised by existing heavy workloads and required intervention by project coordinator. | During scale-up, the focus remained on strengthening supervision quality of partner NGOs.                                                                                                                                                                                       |
| <i>Training time commitment</i>                          | Training schedule difficulty for government clinic workers was mitigated by split of training schedules to maintain clinic duty cover.                                                                                    | Long training time commitment was mitigated by incentivisation.                                                                                                                                                                                         | -                                                                                                                                                                                                                                                                              | -                                                                                                                                                                                                                                                                               |
| <i>Staff recruitment / remuneration / retention</i>      | Salaried government workers expected incentivisation for additional work and some refused to conduct sessions; this was mitigated by motivational meetings and supervision.                                               | Attrition of workers was mitigated through fast-track training programme. Workers in one affluent town did not value RCEL project, and tasks were unfamiliar to these workers (<3% of sample).                                                          | Difficulty in identifying CHWs to deliver intervention in addition to existing routine. High turnover of CHWs considering intervention too time consuming.                                                                                                                     | Difficulties in identifying sufficiently qualified workers, but not overqualified and viewed RCEL as 'beneath their station'. Initial high attrition rates as workers apprehensive about working with children <3 yrs. Changes made to training modules and selection criteria. |
| <i>Supervision</i>                                       | -                                                                                                                                                                                                                         | Reluctance from providers unfamiliar with close coaching was mitigated by promoting positive tutoring relationships. Implications and impacts from rurality of workers on supervision.                                                                  | Supervision not considered a priority by supervisor priority requiring project coordinator to intervene, holding meetings with CDAs and performing supervised visits.                                                                                                          | -                                                                                                                                                                                                                                                                               |
| <b>CONTENT: CHALLENGES AND COURSE CORRECTION</b>         |                                                                                                                                                                                                                           |                                                                                                                                                                                                                                                         |                                                                                                                                                                                                                                                                                |                                                                                                                                                                                                                                                                                 |
| <i>Adaptation for implementation</i>                     | Minor adaptations to Reach-up for the pair study and major adaptation for the group study. Adapted for use in community clinics instead of homes and to be used for fortnightly visits instead of weekly in both studies. | Simplification of curricula language to facilitate provider use. Reluctance to lend toys/materials led to introduction of toy library. Wide developmental age range in groups led to adaptation with more baby-friendly routines and sub-groups by age. | Reach-Up was adapted for twice monthly visits instead of the original weekly visit. Mothers did not like the toy's original appearance which they considered poor. Toy was redesigned to be more appealing.                                                                    | During scale-up in other regions of India e.g. Bangalore, training module was contextualized, and nutrition menu adapted to the local context.                                                                                                                                  |
| <i>Materials</i>                                         | Complaints regarding quality of toys (parents) led to extended provider training to facilitate more 'fun' interactive                                                                                                     | Initial reluctance for recyclable toy materials but toy-making workshops changed perceptions. Toy library                                                                                                                                               | Materials required cultural adaptation. Adaptation guide needed to be clear regarding exactly what could be adapted                                                                                                                                                            | Materials were translated for regions requiring the desired learning materials.                                                                                                                                                                                                 |

|                                                              |                                                                                                                                                                                                                                                                                 |                                                                                                                                                                                                                                                                                                   |                                                                                                                                                                                                      |        |
|--------------------------------------------------------------|---------------------------------------------------------------------------------------------------------------------------------------------------------------------------------------------------------------------------------------------------------------------------------|---------------------------------------------------------------------------------------------------------------------------------------------------------------------------------------------------------------------------------------------------------------------------------------------------|------------------------------------------------------------------------------------------------------------------------------------------------------------------------------------------------------|--------|
|                                                              | sessions and directions for making new toys.                                                                                                                                                                                                                                    | developed to promote unrestricted use which was appreciated by caregivers.                                                                                                                                                                                                                        | and what concepts had to be maintained to guarantee fidelity.                                                                                                                                        |        |
| <i>Recipient attendance, retention &amp; incentivisation</i> | Attendance challenges included distance to clinic, late start to sessions, and expectation of nutritional supplement. More timely attendance and stricter time-keeping encouraged. Incentivisation included oil supplementation distribution & caregiver motivational meetings. | High value of project nutritional package incentivised attendance. Tutors and providers supported problem-solving to overcome barriers to attendance (i.e. long distances, travel costs, job responsibilities etc.). Encouraging positive social interactions meant beneficiaries more motivated. | Beneficiaries had no other incentives but the program itself. The major cause of attrition was mobile populations due to rental accommodation. Mothers enjoyed and wanted to complete the programme. | -      |
| <b>References</b>                                            | (1-3)                                                                                                                                                                                                                                                                           | (1, 4)                                                                                                                                                                                                                                                                                            | (1, 4)                                                                                                                                                                                               | (1, 5) |

CDA=Child development agent, CHW=Community health worker, RCEL=Responsive caregiving and early learning

#### References

1. Radner J, Ferrer M, McMahon D, Shankar A, Silver K. Practical considerations for transitioning early childhood interventions to scale: lessons from the Saving Brains portfolio. *Ann N Y Acad Sci.* 2018;1419(Special issue: Implementation Research and Practice for Early Childhood Development):230-48.
2. Hamadani J, Mehrin S, Tofail F, Hazan M, Huda S, Baker-Henningham H, et al. Integrating an early childhood development programme into the Bangladeshi Primary Health Care Services: A cluster randomised trial. *Lancet Glob Health.* 2018.
3. Hamadani J, Nahar B, Huda S, Tofail F. Integrating early child development programs into health and nutrition services in Bangladesh: benefits and challenges. *Ann N Y Acad Sci.* 2014;1308(1):192-203.
4. Attanasio O, Baker-Henningham H, Bernal R, Meghir C, Pineda D, Rubio-Codina M. Early Stimulation and Nutrition: the impacts of a scalable intervention. *NBER Working Paper.* 2018(25059).
5. Bajaj M, Sharma S. Scaling-up early childhood centres for migrant construction workers' children in India. *Early Childhood Matters.* 2016;125:74-9.
