# Supplementary material for: Human resources and curricula content for early child development implementation: multicountry mixed methods evaluation
Source: PubMed Central journal article supplement — BMJ Open. 2020 Apr 26;10(4):e032134. doi: 10.1136/bmjopen-2019-032134 (PMC7204990; doi:10.1136/bmjopen-2019-032134), 2020-04-26
Supplement: bmjopen-2019-032134supp001.pdf [file bmjopen-2019-032134supp001.pdf]

Web Appendix Figure A: Portfolio Conceptual Evaluation Framework

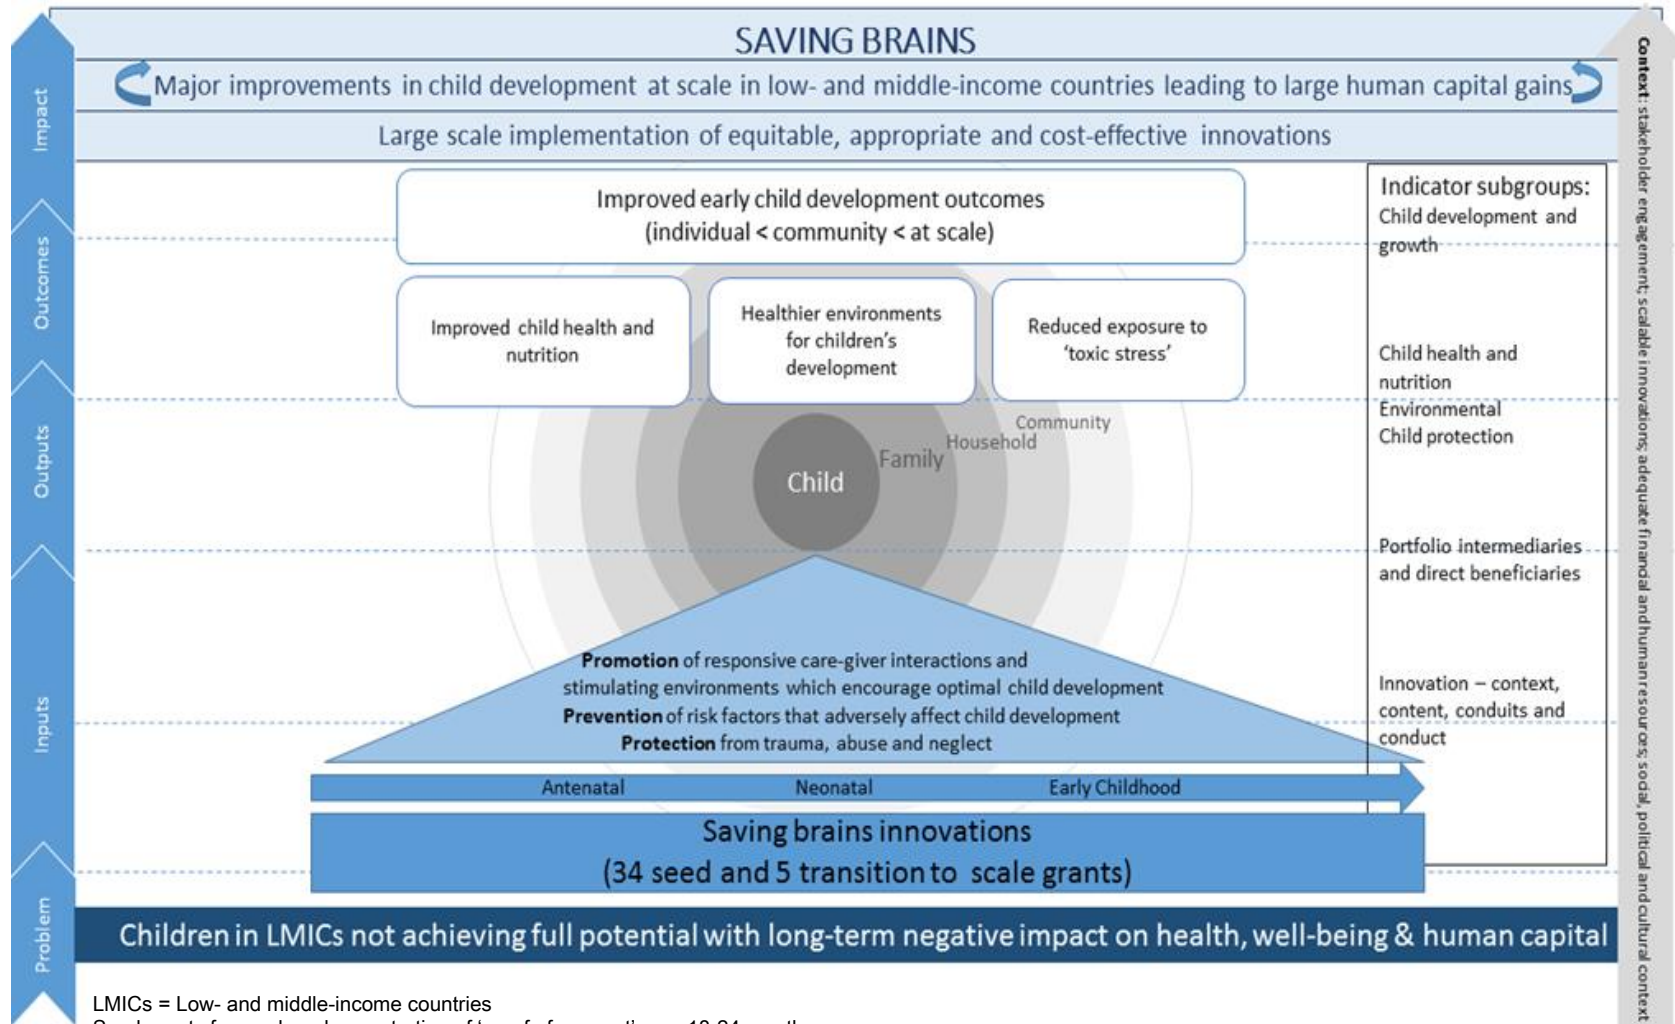

LMICs = Low- and middle-income countries

Seed grants focused on demonstration of 'proof of concept' over 18-24 months.

Transition to scale grants focused on progression towards scale in partnership with other organisations over 3 years.
