# Supplementary material for: Human resources and curricula content for early child development implementation: multicountry mixed methods evaluation
Source: PubMed Central journal article supplement — BMJ Open. 2020 Apr 26;10(4):e032134. doi: 10.1136/bmjopen-2019-032134 (PMC7204990; doi:10.1136/bmjopen-2019-032134), 2020-04-26
Supplement: bmjopen-2019-032134supp002.pdf [file bmjopen-2019-032134supp002.pdf]

Web Appendix Figure B: Saving Brains portfolio level Theory of Change

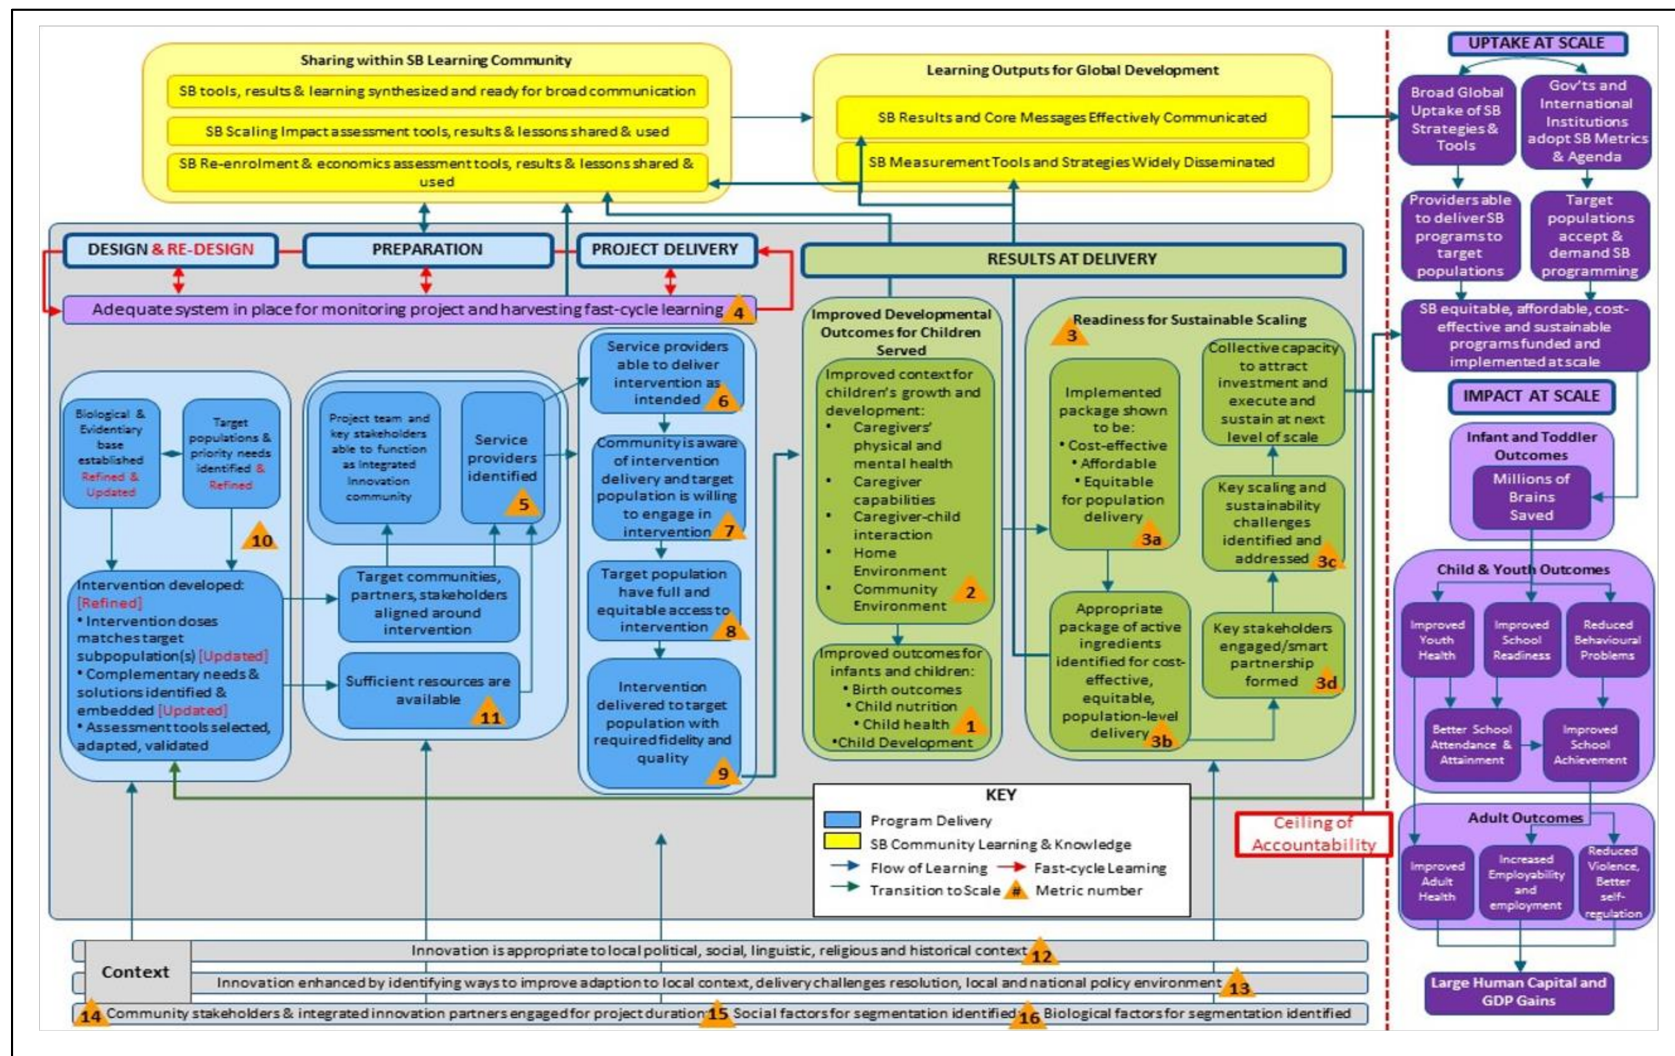

SB=Saving Brains

Note: Theory of Change was developed by Grand Challenges Canada Saving Brains platform members.
