# Supplementary material for: Human resources and curricula content for early child development implementation: multicountry mixed methods evaluation
Source: PubMed Central journal article supplement — BMJ Open. 2020 Apr 26;10(4):e032134. doi: 10.1136/bmjopen-2019-032134 (PMC7204990; doi:10.1136/bmjopen-2019-032134), 2020-04-26
Supplement: bmjopen-2019-032134supp003.pdf [file bmjopen-2019-032134supp003.pdf]

Web Appendix Table A: Data sources utilised for the Saving Brains portfolio evaluation

| Data Source                                                         | Description                                                                                                                                                                                             | Timing of data collection                                                                  | Organisation receiving data                          | Data type                  | Number of data source items                              |
|---------------------------------------------------------------------|---------------------------------------------------------------------------------------------------------------------------------------------------------------------------------------------------------|--------------------------------------------------------------------------------------------|------------------------------------------------------|----------------------------|----------------------------------------------------------|
| <b>Service delivery forms</b>                                       | Document completed by grantees used to collect projected, interim and/or final and quantitative information on workforce and intervention delivery                                                      | Yearly                                                                                     | Grand Challenges Canada                              | Quantitative & Qualitative | 32<br>(Endpoint service delivery forms)                  |
| <b>Results-based Management and Accountability Framework (RMAF)</b> | Framework completed by grantee which facilitates the collection of data and comparison of results around core metrics                                                                                   | Six-monthly                                                                                | Grand Challenges Canada                              | Quantitative & Qualitative | 7                                                        |
| <b>RMAF+</b>                                                        | Framework completed by grantee developed from the original RMAF and Theory of Change containing more detailed metrics on impact, process and context of innovations (Round 3 onwards)                   | Six-monthly                                                                                | Grand Challenges Canada                              | Quantitative & Qualitative | 25                                                       |
| <b>Progress reports</b>                                             | Narrative reports completed by grantees detailing project progression, challenges, lessons learned, results, dissemination and next steps                                                               | Six-monthly                                                                                | Grand Challenges Canada                              | Qualitative                | 32                                                       |
| <b>Research proposals</b>                                           | Proposal of innovation design completed by potential grantees                                                                                                                                           | Point of application for grant                                                             | Grand Challenges Canada                              | Qualitative                | 32                                                       |
| <b>Saving Brains community meeting transcripts</b>                  | Transcripts from discussions between grantees and platform members at two Saving Brains community meetings                                                                                              | 21 <sup>st</sup> -22 <sup>nd</sup> Jun 2016<br>25 <sup>th</sup> -26 <sup>th</sup> Oct 2016 | London School of Hygiene & Tropical Medicine (LSHTM) | Qualitative                | 2                                                        |
| <b>Key informant interviews</b>                                     | Key informants, including Saving Brains project leads, identified through professional networks and approached for interview on relevant themes                                                         | Jun-Oct 2016                                                                               | World Health Organization & LSHTM                    | Qualitative                | 19                                                       |
| <b>Grantee interviews</b>                                           | Grantees identified by LSHTM and platform members for thematic discussion                                                                                                                               | Jul-Sept 2016                                                                              | LSHTM Qualitative                                    | Qualitative                | 21                                                       |
| <b>Focus group discussions</b>                                      | Grantees selected and invited to focus group discussions, either online or during Saving Brains community meetings, on workforce choices, supervision and training, and monitoring quality and coverage | Jun-Oct 2016                                                                               | LSHTM                                                | Qualitative                | 13<br><br>(4-10 participants per focus group discussion) |
