# Supplementary material for: Human resources and curricula content for early child development implementation: multicountry mixed methods evaluation
Source: PubMed Central journal article supplement — BMJ Open. 2020 Apr 26;10(4):e032134. doi: 10.1136/bmjopen-2019-032134 (PMC7204990; doi:10.1136/bmjopen-2019-032134), 2020-04-26
Supplement: bmjopen-2019-032134supp005.pdf [file bmjopen-2019-032134supp005.pdf]

Web Appendix Table C: Key informants contributing to qualitative components of portfolio evaluation

|                                                                                                                                                                                                                                                   | Organisation Type/Name                                       | Position                        | Question theme                                                                       |
|---------------------------------------------------------------------------------------------------------------------------------------------------------------------------------------------------------------------------------------------------|--------------------------------------------------------------|---------------------------------|--------------------------------------------------------------------------------------|
| <b>EARLY CHILD DEVELOPMENT (ECD) POLICY AND PROGRAMMING</b>                                                                                                                                                                                       |                                                              |                                 |                                                                                      |
| 1.                                                                                                                                                                                                                                                | Saving Brains                                                | Executive                       | ECD research, policy and programming; contemporary challenges and future directions. |
| 2.                                                                                                                                                                                                                                                | Multilateral UN organisation                                 | Policy and programming.         | ECD research, policy and programming; contemporary challenges and future directions. |
| 3.                                                                                                                                                                                                                                                | Multilateral UN organisation                                 | Policy and programming.         | ECD research, policy and programming; contemporary challenges and future directions. |
| 4.                                                                                                                                                                                                                                                | Private international ECD foundation                         | Policy maker.                   | ECD research, policy and programming; contemporary challenges and future directions. |
| 5.                                                                                                                                                                                                                                                | International Financial Institution.                         | Policy maker.                   | ECD research, policy and programming; contemporary challenges and future directions. |
| 6.                                                                                                                                                                                                                                                | Multilateral non-government organisation.                    | Policy & programming.           | ECD programming, iNGO perspective on what is needed to progress the field            |
| 7.                                                                                                                                                                                                                                                | International Child Health Research Institution              | Policy, programming & research. | ECD in global child health – challenges and future directions.                       |
| 8.                                                                                                                                                                                                                                                | Non-government disability-ECD organisation - national level. | Policy and programming.         | Inclusion in ECD programming – iNGO perspective                                      |
| 9.                                                                                                                                                                                                                                                | Ministry of Health, sub-Saharan African country.             | Policy and Programming          | ECD in global child health, health perspectives.                                     |
| <b>OTHER EXPERTS IN FIELD</b>                                                                                                                                                                                                                     |                                                              |                                 |                                                                                      |
| <b>General</b>                                                                                                                                                                                                                                    |                                                              |                                 |                                                                                      |
| 10.                                                                                                                                                                                                                                               | Public health academic institution, UK                       | Senior Researcher               | Research priorities in ECD                                                           |
| 11.                                                                                                                                                                                                                                               | Public health academic institution, USA.                     | Senior Researcher.              | Challenges, priorities and approaches in future ECD research.                        |
| <b>Specific technical</b>                                                                                                                                                                                                                         |                                                              |                                 |                                                                                      |
| 12.                                                                                                                                                                                                                                               | Public health academic institution, USA.                     | Senior Researcher.              | Impact metrics                                                                       |
| 13.                                                                                                                                                                                                                                               | Public health academic institution, USA.                     | Researcher.                     | Impact metrics                                                                       |
| 14.                                                                                                                                                                                                                                               | Public health academic institution, UK                       | Senior Researcher.              | Impact metrics                                                                       |
| 15.                                                                                                                                                                                                                                               | Multilateral UN organisation.                                | Senior Researcher.              | Impact metrics                                                                       |
| 16.                                                                                                                                                                                                                                               | Saving Brains Grant Recipient Research Institution.          | Senior Researcher.              | Implementation process metrics, human resourcing.                                    |
| 17.                                                                                                                                                                                                                                               | Saving Brains Grant Recipient Research Institution.          | Senior Researcher.              | Implementation process metrics, cost-effectiveness                                   |
| 18.                                                                                                                                                                                                                                               | Saving Brains Grant Recipient Research Institution.          | Senior Researcher.              | Integration.                                                                         |
| 19.                                                                                                                                                                                                                                               | Academic Centre, USA.                                        | Senior Researcher.              | Implementation process knowledge gaps, priority questions and research methodology.  |
| <b>Saving Brains Platform</b>                                                                                                                                                                                                                     |                                                              |                                 |                                                                                      |
| Members of the Saving Brains Platform team who were consulted about various aspects of the evaluation, their experiences working within the Saving Brains portfolio and in regard to specific technical, programming and research related themes. |                                                              |                                 |                                                                                      |
| <b>Grantees</b>                                                                                                                                                                                                                                   |                                                              |                                 |                                                                                      |
| Twenty-one of thirty-nine (54%) of research teams were specifically interviewed regarding their innovation and various aspects of their experiences within the Saving Brains portfolio.                                                           |                                                              |                                 |                                                                                      |

ECD=Early Child Development
